# Supplementary material for: Analysis of risk factors and outcome in peritoneal dialysis patients with early-onset peritonitis: a multicentre, retrospective cohort study
Source: PubMed Central journal article supplement — BMJ Open. 2020 Feb 13;10(2):e029949. doi: 10.1136/bmjopen-2019-029949 (PMC7045164; doi:10.1136/bmjopen-2019-029949), 2020-02-13
Supplement: bmjopen-2019-029949.draft_revisions.pdf [file bmjopen-2019-029949.draft_revisions.pdf]

# BMJ Open

BMJ Open is committed to open peer review. As part of this commitment we make the peer review history of every article we publish publicly available.

When an article is published we post the peer reviewers' comments and the authors' responses online. We also post the versions of the paper that were used during peer review. These are the versions that the peer review comments apply to.

The versions of the paper that follow are the versions that were submitted during the peer review process. They are not the versions of record or the final published versions. They should not be cited or distributed as the published version of this manuscript.

BMJ Open is an open access journal and the full, final, typeset and author-corrected version of record of the manuscript is available on our site with no access controls, subscription charges or pay-per-view fees (<http://bmjopen.bmj.com>).

If you have any questions on BMJ Open's open peer review process please email [info.bmjopen@bmj.com](mailto:info.bmjopen@bmj.com)

# BMJ Open

**The analysis of risk factors and outcome in peritoneal dialysis patients with early-onset peritonitis: a multi-center, retrospective, cohort study.**

|                               |                                                                                                                                                                                                                                                                                                                                                                                                                                                                                                                                                                                                                                                                                                                                       |
|-------------------------------|---------------------------------------------------------------------------------------------------------------------------------------------------------------------------------------------------------------------------------------------------------------------------------------------------------------------------------------------------------------------------------------------------------------------------------------------------------------------------------------------------------------------------------------------------------------------------------------------------------------------------------------------------------------------------------------------------------------------------------------|
| Journal:                      | <i>BMJ Open</i>                                                                                                                                                                                                                                                                                                                                                                                                                                                                                                                                                                                                                                                                                                                       |
| Manuscript ID                 | bmjopen-2019-029949                                                                                                                                                                                                                                                                                                                                                                                                                                                                                                                                                                                                                                                                                                                   |
| Article Type:                 | Research                                                                                                                                                                                                                                                                                                                                                                                                                                                                                                                                                                                                                                                                                                                              |
| Date Submitted by the Author: | 20-Feb-2019                                                                                                                                                                                                                                                                                                                                                                                                                                                                                                                                                                                                                                                                                                                           |
| Complete List of Authors:     | Ma, Xiaoyan; Shanghai East Hospital, Department of Nephrology<br>Shi, Yingfeng; Shanghai East Hospital, Department of Nephrology<br>Tao, Min; Shanghai East Hospital, Department of Nephrology<br>Jiang, Xiaolu; Shanghai East Hospital, Department of Nephrology<br>Wang, Yi; Shanghai East Hospital, Department of Nephrology<br>Zang, Xiujuan; Department of Nephrology, Shanghai Songjiang District Central Hospital<br>Jin, Dewei; Shanghai East Hospital, Department of Nephrology<br>Zhuang, Shougang; Shanghai East Hospital, Department of Nephrology;<br>Rhode Island Hospital, Department of Medicine<br>Liu, Na; Department of Nephrology, Shanghai East Hospital, Tongji University School of Medicine, Shanghai, China, |
| Keywords:                     | Peritoneal dialysis, Early-onset peritonitis, Risk factors, Outcomes                                                                                                                                                                                                                                                                                                                                                                                                                                                                                                                                                                                                                                                                  |
|                               |                                                                                                                                                                                                                                                                                                                                                                                                                                                                                                                                                                                                                                                                                                                                       |

SCHOLARONE™  
Manuscripts

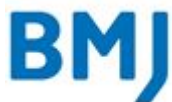

I, the Submitting Author has the right to grant and does grant on behalf of all authors of the Work (as defined in the below author licence), an exclusive licence and/or a non-exclusive licence for contributions from authors who are: i) UK Crown employees; ii) where BMJ has agreed a CC-BY licence shall apply, and/or iii) in accordance with the terms applicable for US Federal Government officers or employees acting as part of their official duties; on a worldwide, perpetual, irrevocable, royalty-free basis to BMJ Publishing Group Ltd ("BMJ") its licensees and where the relevant Journal is co-owned by BMJ to the co-owners of the Journal, to publish the Work in this journal and any other BMJ products and to exploit all rights, as set out in our [licence](#).

The Submitting Author accepts and understands that any supply made under these terms is made by BMJ to the Submitting Author unless you are acting as an employee on behalf of your employer or a postgraduate student of an affiliated institution which is paying any applicable article publishing charge ("APC") for Open Access articles. Where the Submitting Author wishes to make the Work available on an Open Access basis (and intends to pay the relevant APC), the terms of reuse of such Open Access shall be governed by a Creative Commons licence – details of these licences and which [Creative Commons](#) licence will apply to this Work are set out in our licence referred to above.

Other than as permitted in any relevant BMJ Author's Self Archiving Policies, I confirm this Work has not been accepted for publication elsewhere, is not being considered for publication elsewhere and does not duplicate material already published. I confirm all authors consent to publication of this Work and authorise the granting of this licence.

1  
2  
3  
4 1 **The analysis of risk factors and outcome in peritoneal dialysis patients with**  
5  
6 2 **early-onset peritonitis: a multi-center, retrospective, cohort study.**

7  
8 3 Xiaoyan Ma<sup>1\*</sup>, Yingfeng Shi<sup>1\*</sup>, Min Tao<sup>1\*</sup>, Xiaolu Jiang<sup>1\*</sup>, Yi Wang<sup>1</sup>, Xiujuan Zang<sup>2</sup>,  
9  
10 4 Dewei Jin<sup>1</sup>, Shougang Zhuang<sup>1,3</sup>, Na Liu<sup>1</sup>

11  
12 5  
13  
14 6  
15  
16 7 <sup>1</sup>Department of Nephrology, Shanghai East Hospital, Tongji University School of  
17  
18 8 Medicine, Shanghai, China; <sup>2</sup>Department of Nephrology, Shanghai Songjiang District  
19  
20 9 Central Hospital, Shanghai, China; <sup>3</sup>Department of Medicine, Rhode Island Hospital  
21  
22 10 and Brown University School of Medicine, Providence, RI, USA

23  
24 11  
25  
26 12 \*These authors make an equal contribution to this study.

27  
28 13  
29  
30 14 **Corresponding author: Na Liu**, M.D., Ph.D., Department of Nephrology, Shanghai  
31  
32 15 East Hospital, Tongji University School of Medicine, 150 Jimo road, Pudong new  
33  
34 16 district, Shanghai 200120, China. **E-mail:** naliubrown@163.com.

1  
2  
3  
4 29 **ABSTRACT**

5 30 **Objectives** To investigate the risk factors associated with EOP and its influence on  
6  
7 31 patients' technique survival and mortality in Shanghai.

8  
9 32 **Study design** Retrospective, cohort study.

10  
11 33 **Setting** Three peritoneal dialysis centers in Shanghai.

12  
13 34 **Participants** PD patients from June 1, 2006, to May 1, 2018, were recruited and  
14  
15 35 followed up until December 31, 2018. According to time-to-first episode of  
16  
17 36 peritonitis, patients were divided into non-peritonitis (n=144), early-onset peritonitis  
18  
19 37 ( $\leq 6$  months, n=74) and late-onset peritonitis (LOP) ( $> 6$  months, n=139).

20  
21 38 **Primary and secondary outcome measures** Early-onset peritonitis was defined as  
22  
23 39 the first episode of peritonitis occurring within 6 months after the initiation of  
24  
25 40 peritoneal dialysis (PD). The outcomes were all-cause mortality and technique failure.

26  
27 41 **Results** Of the 357 patients, 74 (20.7%) patients developed their first episode of  
28  
29 42 peritonitis within the first 6 months. Compared with the LOP group, the EOP group  
30  
31 43 had older ages, more female patients, higher Charlson comorbidity index (CCI) score  
32  
33 44 and white blood cell levels, lower serum albumin levels and renal function at the time  
34  
35 45 of initiation of PD and higher diabetes mellitus and peritonitis rates ( $P<0.05$ ).  
36  
37 46 Staphylococcus was the most common Gram-positive organism in both EOP and LOP  
38  
39 47 groups. The multivariate logistic regression analysis showed that factors associated  
40  
41 48 with EOP included older age (odds ratio (OR) 1.027,  $P=0.041$ ), a higher CCI score  
42  
43 49 (OR 1.298,  $P=0.008$ ), low serum albumin level (OR 0.929,  $P=0.015$ ) and low eGFR  
44  
45 50 (OR 0.907,  $P=0.046$ ) at start of PD. In the Cox proportional hazards model, EOP was  
46  
47 51 a significant predictor of technique failure (hazard ratio (HR) 1.664,  $P=0.048$ ). There  
48  
49 52 were no differences between EOP and LOP for all-cause mortality.

50  
51 53 **Conclusion** Older age, a higher CCI score and lower serum albumin level and eGFR  
52  
53 54 before PD were significantly associated with EOP. EOP also predicted a high  
54  
55 55 peritonitis rate and poor clinical outcomes.

56  
57 56  
58  
59  
60

1  
2  
3  
4 57 **KEY WORDS** Peritoneal dialysis; Early-onset peritonitis; Risk factors; Outcomes.  
5  
6

7  
8  
9  
10 58

## 11 59 **ARTICLE SUMMARY**

### 12 60 **Article focus**

- 13 61 ● The risk factors associated with EOP and its influence on patients' technique  
14  
15 62 survival and mortality in Shanghai.

### 16 63 **Key messages**

- 17  
18 64 ● Older age, a higher CCI score and lower serum albumin level and eGFR before  
19  
20 65 PD were significantly associated with EOP.  
21  
22 66 ● EOP predicted a high peritonitis rate and poor clinical outcomes.  
23  
24  
25  
26  
27  
28

### 29 67 **Strengths and limitations of this study**

- 30  
31 68 ● There is a strict exclusion criteria based on PD histories.  
32  
33 69 ● We conducted a multi-center study which ensured sufficient power in obtaining  
34  
35 70 the risk factors of EOP.  
36  
37 71 ● This was a retrospective cohort study, lacking of some objective information such  
38  
39 72 as medical level, economic development and living standard, which may cause  
40  
41 73 bias.  
42  
43 74 ● The study did not compare the risk factors of EOP between male and female  
44  
45 75 patients.  
46  
47 76 ● Although this was a multicenter study, the sample size was relatively small.  
48  
49  
50  
51  
52  
53  
54  
55  
56  
57  
58  
59  
60

## 79 INTRODUCTION

80 In developing countries, the number of peritoneal dialysis (PD) patients has been  
81 increasing over time.<sup>1 2</sup> Peritoneal dialysis (PD)-related peritonitis is a serious  
82 complication during PD therapy and remains the major reason for technique failure.<sup>3</sup>  
83 Peritoneum suffered from the frequency and the timing of infection could impact  
84 peritoneum structure and change the permeability of the membrane, leading to  
85 peritoneal fibrosis.<sup>4</sup> Therefore, finding the risk factors for peritonitis in the early PD  
86 period is important to reduce technique failures and mortality of PD patients.

87 The definition of early-onset peritonitis varies widely between studies, which  
88 generally refers to peritoneal dialysis related peritonitis occurring within 3-24 months  
89 after surgical catheterization.<sup>5 6</sup> Previous studies showed that the first episode of  
90 peritonitis in PD patients could significantly affect the prognosis of end-stage renal  
91 disease (ESRD) patients.<sup>7</sup> However, few studies have specifically examined the risk  
92 factors for peritonitis in the early PD period. And most of these were observational  
93 cohort studies carried out in single centers,<sup>5 8 9</sup> limiting the generalizability of their  
94 observed outcomes. To determine the risk factors for early-onset peritonitis in  
95 Chinese CKD patients and its influence on patients' technique survival and mortality,  
96 we conducted this multiple-center, retrospective cohort study.

## 98 METHODS

### 99 Study Population

100 This was a multi-center retrospective cohort study included 357 patients with ESRD  
101 who underwent PD in Department of Nephrology in Baoshan branch of Shanghai  
102 First People's Hospital, Shanghai Songjiang District Central Hospital and Shanghai  
103 East Hospital, Tongji University School of Medicine. All incident PD patients from  
104 June 1, 2006, to May 1, 2018, were recruited and followed up until December 31,  
105 2018. They agreed to take part in the survey and provided informed consents. The  
106 exclusion criteria were as follows: patients who had been using PD for fewer than 90  
107 days, patients with an age younger than 18 years and patients who initiated PD in

1  
2  
3  
4 108 other PD centers and previously accepted HD or kidney transplantation. Patients were  
5  
6 109 followed until any of the following events: death, a change to HD, renal  
7  
8 110 transplantation or until December 31, 2018. Dialysis catheters were placed through  
9  
10 111 sterile surgical techniques, patients initiated PD by Dianeal with 1.5% or 2.5%  
11  
12 112 dextrose (Baxter Healthcare, Guangzhou, China). Dialysate concentration was 1.5%  
13  
14 113 dextrose and replaced every four hours during the day, while 2.5% at night and kept  
15  
16 114 in the body. Mupirocin ointment was used in every patient to prevent exit site  
17  
18 115 infection. A total of 213 patients who had at least one episode of peritonitis.  
19  
20 116 According to time-to-first episode of peritonitis, patients were divided into  
21  
22 117 non-peritonitis (n=144), early-onset peritonitis ( $\leq 6$  months, n=74) and late-onset  
23  
24 118 peritonitis ( $> 6$  months, n=139). We collected baseline characteristics within 1-3  
25  
26 119 months from the start of PD, including demographic data (age, gender, smoking,  
27  
28 120 drinking, CCI, BMI), medical history, drug-taking history, biochemical data (white  
29  
30 121 blood cell, hemoglobin, serum electrolyte, fasting blood glucose, total cholesterol,  
31  
32 122 total triglyceride, high-density lipoprotein cholesterol, low-density lipoprotein  
33  
34 123 cholesterol, and serum albumin, uric acid, creatinine, blood urea nitrogen, estimated  
35  
36 124 glomerular filtration rate (eGFR), the clearance rate of urea nitrogen (Kt/V), residual  
37  
38 125 renal function (RRF)), cause of ESRD, peritonitis episodes. Peritoneal fluid effluent  
39  
40 126 from patients with peritonitis was collected and cultured for 1 to 5 days to identify the  
41  
42 127 bacterial flora in the dialysate.  
43  
44  
45

128

### 129 **Primary and secondary outcome measures**

48 130 Early-onset peritonitis was defined as the first episode of peritonitis occurring within  
49  
50 131 6 months after the initiation of peritoneal dialysis (PD). The outcomes were all-cause  
51  
52 132 mortality and technique failure.  
53

54 133

### 56 134 **Study definitions**

58 135 Diagnostic criteria for peritonitis based on the 2010 International Society for  
59  
60



1  
2  
3  
4 136 Peritoneal Dialysis (ISPD) guidelines.<sup>6</sup> Patients diagnosed as peritonitis should meet  
5  
6 137 at least two of the following three standards: (1) Clinical symptoms or signs of  
7  
8 138 peritonitis; (2) Leucocyte count (at least 100/mm<sup>3</sup>) and polymorphonuclear  
9  
10 139 neutrophilic cells proportion (at least 50%) in peritoneal fluid effluent; (3) Related  
11  
12 140 pathogens in smear or culture of peritoneal fluid. Early-onset peritonitis was defined  
13  
14 141 as the first episode of peritonitis occurring within 6 months after the initiation of PD.  
15  
16 142 The outcomes were all-cause mortality and technique failure. Death was an end-point  
17  
18 143 event in the patient survival analysis. Switching to HD or receiving renal  
19  
20 144 transplantation were censored. Technique failure was defined as the transfer to HD  
21  
22 145 therapy permanently due to ultrafiltration failure, peritonitis, exit-site infection and  
23  
24 146 other operational problems.  
25

26 147

#### 28 148 **Patient and public involvement**

29  
30 149 No patient was involved in the design or conduct of the study, but the results of the  
31  
32 150 study will be shared to patients coming for follow-up.  
33

34 151

#### 36 152 **Statistical analysis**

37  
38 153 All statistical analyses were performed by SPSS 20.0 for Windows (IBM Corp.,  
39  
40 154 Armonk, NY, USA). The normal distributed data were showed as mean±standard  
41  
42 155 deviation (SD) and the skewed data were showed as median values with the 25th to  
43  
44 156 75th percentile intervals. Categorical data were expressed as frequency (n) and  
45  
46 157 percentage (%). As for normally distributed data, student's t-test is using for  
47  
48 158 analyzing the differences between the EOP group and LOP group, while one-way  
49  
50 159 ANOVA for differences among in non-peritonitis, EOP group and LOP groups. The  
51  
52 160 Wilcoxon rank sum test for skewed continuous data and the Chi-square test or  
53  
54 161 Fisher's exact test for categorical data. The Kaplan-Meier survival curves were drawn  
55  
56 162 for each event of interest (technique survival and patient survival) and the log-rank  
57  
58 163 test was used to compare curves. Univariate Cox proportional hazards regression was  
59  
60

1  
2  
3  
4 164 used to select significant factors associated with study outcomes. Variables whose  
5  
6 165  $P < 0.05$  were selected for inclusion in the final multivariate Cox model. Multivariate  
7  
8 166 logistic regression was calculated to select significant risk factors for EOP and the  
9  
10 167 inclusion standard was also  $P < 0.05$ . Collinearity of variables was tested. A two-tailed  
11  
12 168  $P$  value  $< 0.05$  was considered statistically significant.

13  
14 169

## 15 16 170 **RESULTS**

### 17 18 171 **Patient Characteristics**

19  
20 172 A total of 357 patients with ESRD underwent CAPD in three dialysis centers in  
21  
22 173 Shanghai during the study period. All patients used Dianeal with 1.5% or 2.5%  
23  
24 174 dextrose. The first episode of peritonitis was experienced by 74 (20.7%) patients  
25  
26 175 within 6 months after the start of PD. Median follow-up time for the 357 patients was  
27  
28 176 33.0 months (interquartile range 14.0-50.0 months). There were 211 males (59.1%)  
29  
30 177 with an average age of  $61.6 \pm 14.0$  years, and 145 females (40.9%) with an average  
31  
32 178 age of  $65.3 \pm 12.9$  years. The most common primary renal diseases were chronic  
33  
34 179 glomerulonephritis (43.1%) and diabetic nephropathy (34.2%). Compared with the  
35  
36 180 LOP patients, the EOP patient group had older ages, more female patients, higher  
37  
38 181 Charlson comorbidity index (CCI) score and white blood cell levels, lower serum  
39  
40 182 albumin levels and renal function at the time of initiation of PD and higher diabetes  
41  
42 183 mellitus and peritonitis rates ( $P < 0.05$ ). Additional demographic and laboratory  
43  
44 184 characteristics of the study population are present in Table 1.

45  
46 185

### 47 48 186 **Causative organisms**

49  
50 187 In table 2, among 213 patients with peritonitis, 47 (22.1%) were due to Gram-positive  
51  
52 188 organisms, 24 (11.3%) were due to Gram-negative organisms, 6 (2.8%) were due to  
53  
54 189 fungi, 1 (0.4%) were due to multiple organisms, and 135 (63.4%) were  
55  
56 190 culture-negative. Staphylococcus was the most common Gram-positive organism in  
57  
58 191 both groups. Compared with the EOP patient group, the LOP patient group had more

1  
2  
3  
4 192 culture-negative peritonitis (89.2% vs. 14.9%,  $P < 0.001$ ).

5  
6 193

7  
8 194 **Outcomes**

9  
10 195 The total peritonitis rate was 0.660 episodes per patient-year (213 patients presented  
11 196 509 episodes of peritonitis during 771.33 patient-years of follow-up). Early-onset first  
12 197 episode of peritonitis had a lower cure rate (17.6% vs 33.8%, Table 2.), higher rate of  
13 198 transferring to hemodialysis (27.0% vs 19.4%, Table 2.), and higher mortality (21.6%  
14 199 vs 14.4%, Table 2.) compared to late-onset first episode of peritonitis.

15  
16 200

17  
18 201 **Technique failure**

19  
20 202 After adjusting for serum albumin, age in the multivariate Cox analysis for technique  
21 203 failure, EOP was significantly associated with technique failure compared with the  
22 204 LOP group, with a hazard ratio (HR) of 1.664 (Table 3,  $P = 0.048$ ). Kaplan-Meier  
23 205 analysis showed that compared with LOP group, technique survival was lower in the  
24 206 EOP group (log rank 7.985,  $P = 0.005$ , Fig.1).

25  
26 207

27  
28 208 **All-cause mortality**

29  
30 209 During the study period, a total of 52 peritonitis patients died: 16 patients in the EOP  
31 210 group and 20 patients in the LOP group. After adjusting for age and serum albumin,  
32 211 there were no significant differences between the EOP and LOP groups in the  
33 212 multivariate Cox proportional hazards model (Table 3). Fig. 2 describes cumulative  
34 213 survival by EOP and LOP groups using the Kaplan-Meier analysis. Compared with  
35 214 LOP group, cumulative survival was lower in the EOP group (log rank 4.060,  
36 215  $P = 0.044$ ).

37  
38 216

39  
40 217 **Risk factors of early-onset peritonitis**

41  
42 218 Variables in Table 1 were tried in a univariate logistic regression model, and only  
43 219 variables with  $P$  value  $< 0.10$  or traditional risk factors for peritonitis were depicted in  
44  
45  
46  
47  
48  
49  
50  
51  
52  
53  
54  
55  
56  
57  
58  
59  
60

1  
2  
3  
4 220 Table 4. Based on the simple logistic regression analysis of risk factors associated  
5  
6 221 with EOP (Table 4), we constructed a multiple logistic regression model using  
7  
8 222 variables including gender, age, CCI score, diabetes, serum albumin, eGFR. We  
9  
10 223 found that older age, higher CCI score, lower serum albumin level and eGFR at the  
11  
12 224 start of PD, were significantly associated with EOP (Table 4). Every 1 year increase  
13  
14 225 in age improved the risk of EOP by 2.7% (OR 1.027, P=0.041). Every 1 score  
15  
16 226 increase in the CCI improved the risk of EOP by 26.1% (OR 1.298, P=0.008). Every  
17  
18 227 1 g/L increase in the baseline serum albumin level lowered the risk of EOP by 7.4%  
19  
20 228 (OR 0.929, P=0.015). Every 1 ml/min/1.73 m<sup>2</sup> increase in the eGFR lowered the risk  
21  
22 229 of EOP by 9.8% (OR 0.907, P=0.046).

23  
24 230

## 25 26 231 **DISCUSSION**

27  
28  
29 232 Our retrospective cohort study of 357 PD patients showed that 74 (20.7%) patients in  
30  
31 233 three Shanghai dialysis centers developed the first episodes of peritonitis within the  
32  
33 234 first 6 months. Older age, higher CCI score, lower serum albumin level and eGFR at  
34  
35 235 the start of PD, were significantly associated with EOP. In addition, an early  
36  
37 236 peritonitis onset predicted a high peritonitis rate and technique failure.

38  
39 237 Early-onset peritonitis is a major complication of peritoneal dialysis, directly or  
40  
41 238 indirectly causing the abandon of dialysis treatment. In this study, among 213 patients  
42  
43 239 with peritonitis, 47 (22.1%) were due to Gram-positive organisms, 24 (11.3%) were  
44  
45 240 due to Gram-negative organisms, 6 (2.8%) were due to fungi. Staphylococcus was the  
46  
47 241 most common Gram-positive organism in both early-onset and late-onset peritonitis.  
48  
49 242 This bacterial flora distribution and high incidence of staphylococcus were similar to  
50  
51 243 previous reports.<sup>10-12</sup> Fungal peritonitis was rare in PD patients, but could bring out  
52  
53 244 irreversible peritoneal damage.<sup>13</sup> Recent clinical studies confirmed that the incidence  
54  
55 245 of fungal peritonitis was only 3%-6%,<sup>13</sup> while the relative mortality rate was up to  
56  
57 246 20%-30%.<sup>14</sup> The culture-negative proportion for the first peritonitis episode was high  
58  
59 247 in the LOP patients (89.2%). This may primary attributed to early antibiotic treatment  
60

1  
2  
3  
4 248 before effluent culture, especially in these patients who have received therapy at the  
5  
6 249 early stage of peritonitis in local hospitals. Several ways that pathogenic bacteria  
7  
8 250 intruded into peritoneal: dialysis catheter, dialysis catheter outlet and subcutaneous  
9  
10 251 tunnel, intestinal infection and hematogenous peritonitis. Thus, standardized dialysis  
11  
12 252 catheter procedures and individualized antibiotics treatment are called to reduce the  
13  
14 253 incidence of peritonitis.

15  
16 254 It was well known that PD patients lost about 10 g of protein per day from  
17  
18 255 abdominal cavity, especially when combined with early-onset peritonitis. Loss of  
19  
20 256 protein would cause negative nitrogen balance and malnutrition, leading to a decline  
21  
22 257 in immune function and increased susceptibility to pathogenic microorganisms.<sup>15</sup>  
23  
24 258 Malnutrition was one of the most common complications in PD patients, and plasma  
25  
26 259 albumin level was an important clinical predictor. Hypoalbuminemia was proved to  
27  
28 260 be related with malnutrition, protein losses, and inflammation.<sup>16 17</sup> Wang Qin et al.  
29  
30 261 discovered that patients with an initial serum albumin level less than 2.9 g/dL had a  
31  
32 262 higher incidence of peritonitis. And they regarded hypoalbuminemia as an  
33  
34 263 independent predictor for subsequent peritonitis at the start of PD therapy.<sup>18</sup> Further  
35  
36 264 studies demonstrated that low serum albumin level increased all-cause,  
37  
38 265 cardiovascular, and infection related mortality in both PD and HD patients.<sup>19</sup> In  
39  
40 266 addition to peritoneal infection, hypoalbuminemia was also found to be associated  
41  
42 267 with septicemia, pneumonia and other inflammatory responses.<sup>20-24</sup> In this study, we  
43  
44 268 reaffirmed that a low baseline serum albumin level is an independent risk factors for  
45  
46 269 EOP. Every 1 g/L increase in the baseline serum albumin level lowered the risk of  
47  
48 270 EOP by 7.4% (OR 0.929, P=0.015).

49  
50 271 Our study showed that older dialysis patients had a greater chance of developing  
51  
52 272 early-onset peritonitis. It was reported that those patients were more likely to progress  
53  
54 273 to a worse outcome, such as HD, renal transplantation or death.<sup>25</sup> Incidence of  
55  
56 274 malnutrition in elderly PD patients was more common than young and middle-aged  
57  
58 275 patients. Together with cardiovascular diseases, cerebrovascular disease, hearing and  
59  
60

1  
2  
3  
4 276 visual impairments, all of these factors increase and aggravate the episode of  
5  
6 277 peritonitis.<sup>26-28</sup> Malnutrition in elder not only affected the quality of dialysis patients'  
7  
8 278 life, but also was an important factor in comorbidity and mortality.<sup>29</sup> Other elements  
9  
10 279 that increased the peritonitis susceptibility in elderly patients included generalized  
11  
12 280 functional deterioration, weakened immune system,<sup>30</sup> combined chronic diseases, bad  
13  
14 281 eyesight, poor aseptic concept, lack of compliance and living alone. Their atypical  
15  
16 282 clinical symptoms of peritonitis could be regarded as another essential reason.  
17  
18 283 Up-regulated pain threshold, unobtrusive bellyache and mild subjective symptoms  
19  
20 284 might cover up early-onset peritonitis until the occurrence of liquid turbidity, which  
21  
22 285 would delay the best time for treatment.

23  
24 286 Comparison in biochemical indicators shown that Kt/V and residual renal  
25  
26 287 function decreased significantly after early-onset peritonitis. Multivariate logistic  
27  
28 288 regression showed that every 1 ml/min/1.73 m<sup>2</sup> increase in the eGFR lowered the risk  
29  
30 289 of EOP by 9.8% (OR 0.907, P=0.046). These results suggest that early infection with  
31  
32 290 peritonitis might further worsen renal function, especially the scavenging capacity of  
33  
34 291 solutes by residual kidney. Early inflammatory response and renal function damage  
35  
36 292 might be the underlying causes of peritonitis. Many studies draw a similar conclusion  
37  
38 293 that the survival rate of PD patients mainly depends on residual renal function, rather  
39  
40 294 than the peritoneal cleaning capacity.<sup>31-33</sup> Harris et al. further put forward that residual  
41  
42 295 renal function less than 4 ml·min<sup>-1</sup>·1.73m<sup>-2</sup> was associated with high mortality during  
43  
44 296 peritoneal dialysis.<sup>34</sup> Therefore, we should pay close attention to the change of  
45  
46 297 residual renal function when monitoring the adequacy of dialysis.

47  
48 298 The relationship between peritonitis and technique failure and death have been  
49  
50 299 investigated in previous Chinese single-center studies.<sup>35 36</sup> A study in Chinese  
51  
52 300 Zhejiang province showed that, EOP was a significant predictor of all-cause  
53  
54 301 mortality. As for technique failure, they found no significant differences between  
55  
56 302 EOP and LOP.<sup>35</sup> However, a study in Chinese Guangzhou province indicated that  
57  
58 303 technique failure in EOP group was lower than LOP group, but patient survival did  
59  
60

1  
2  
3  
4 304 not differ between the two groups.<sup>36</sup> Our present study got the similar results with  
5  
6 305 Guangzhou study. In the Cox proportional hazards model, EOP was a significant  
7  
8 306 predictor of technique failure (hazard ratio (HR) 1.664, 95% CI 1.003-2.761,  
9  
10 307 P=0.048). There were no differences between EOP and LOP for all-cause mortality.  
11  
12 308 These conclusions might be limited by regional and demographic differences in  
13  
14 309 different dialysis center. However, all three studies indicated that patients who  
15  
16 310 experienced peritonitis early after the initiation of PD were likely having more  
17  
18 311 episodes of peritonitis. Repeating peritonitis in EOP patients have an obvious impact  
19  
20 312 on membrane permeability, increasing severe systemic inflammation, reducing  
21  
22 313 ultrafiltration and leading to worse clinical outcomes.<sup>37</sup> Thus, we put forward several  
23  
24 314 targeted opinions for each role involved in PD treatment according to the above  
25  
26 315 correlation factor analysis of early-onset peritonitis, in order to reduce infection  
27  
28 316 incidence, raise therapeutic effect of PD, improve patient's life quality and prognosis.  
29  
30 317 (1) Patient: every PD patients should set up an aseptic concept and follow standard  
31  
32 318 operation. (2) Family: family members have obligation to assist patients in  
33  
34 319 completing PD operations, especially for elderly and poor eyesight patients. (3)  
35  
36 320 Society: A series of policies are needed to ensure the treatment right and medical  
37  
38 321 insurance benefits of PD patients. (4) Nurse: Experienced nurses should carry out  
39  
40 322 professional and systematic training on normalized PD operation for patients and their  
41  
42 323 families. (5) Doctor: Doctors should pay attention to the treatment of basic diseases,  
43  
44 324 such as hypertension, diabetes and stroke. At the same time in preventing infection  
45  
46 325 and protecting peritoneal function, doctors must grasp the opportunity of conversion  
47  
48 326 from PD to HD. Studies suggested that timely transformation to HD treatment for  
49  
50 327 patients with recurrent peritonitis and other PD related complications can improve  
51  
52 328 survival rate.<sup>38</sup>

53  
54 329 There are several limitations to this study. First, this was a retrospective cohort  
55  
56 330 study, lacking of some objective information such as medical level, economic  
57  
58 331 development and living standard, which may cause bias. Second, although this was a  
59  
60

1  
2  
3  
4 332 multicenter study, the sample size was relatively small. Further larger size and  
5  
6 333 prospective investigation are necessary.  
7

8 334

9  
10 335 **CONCLUSION**

11 336 In summary, this retrospective cohort study found that older age, a higher CCI score  
12  
13 337 and lower serum albumin and eGFR before PD were significantly associated with  
14  
15 338 EOP. In addition, an early peritonitis onset predicted a high peritonitis rate and worse  
16  
17 339 clinical outcomes. Understanding the risk factors for EOP helps to develop effective  
18  
19 340 measures to prevent or delay the complication of peritoneal dialysis as much as  
20  
21 341 possible.  
22  
23 342

24  
25  
26 343 **Acknowledgements** The authors appreciate all the participants and their families.  
27  
28 344 They also thank the members of the study team from Shanghai East Hospital  
29  
30 345 Affiliated to Tongji University School of Medicine, Shanghai Songjiang District  
31  
32 346 Central Hospital and Baoshan Branch of Shanghai First People's Hospital for their  
33  
34 347 assistance in completing this project.  
35

36 348

37  
38 349 **Author Contributors**

39  
40 350 X.M., Y.S. M.T. and X.J. contributed equally to this work. X.M., Y.S. M.T. and X.J.  
41  
42 351 performed the statistical analysis and wrote the manuscript; X.M., Y.S., M.T., X.J.,  
43  
44 352 Y.W., D.J. and X.Z. participated in the data collection; X.M., Y.S., S.Z. and N.L.  
45  
46 353 contributed to discussion; X.M., S.Z. and N.L. participated in the design of the study  
47  
48 354 and edited the manuscript. All authors contributed to data interpretation and revisions  
49  
50 355 of the manuscript critically for important intellectual content. All authors approved  
51  
52 356 the final version of the submitted manuscript and agreed to be accountable for all  
53  
54 357 aspects of the work in ensuring that questions related to the accuracy or integrity of  
55  
56 358 any part of work are appropriately investigated and resolved.  
57

58 359  
59  
60



**360 Funding**

361 This study was supported by the National Nature Science Foundation of China grants  
362 (81670690, 81470991 and 81200492 to N.L., 81270778, 81470920, 81670623 and  
363 81830021 to S.Z.), the Key Discipline Construction Project of Pudong Health Bureau  
364 of Shanghai (PWZxk2017-05 to N.L.), the Branch grant of National key grants of  
365 Ministry of Science and Technology (2018YFA0108802 to S.Z.), the US National  
366 Institutes of Health (2R01DK08506505A1 to S.Z.), the Shanghai Scientific  
367 Committee of China (13PJ1406900 to N.L.).

368 **Competing interests** None declared.

369 **Patient consent** Obtained.

**370 Ethics approval and consent to participate**

371 The study was conducted according to the guidelines of the Helsinki Declaration and  
372 was approved by the Human Research Ethics Committee of Shanghai East Hospital  
373 Affiliated to Tongji University School of Medicine, Human Research Ethics  
374 Committee of Shanghai Songjiang District Central Hospital and the Human Research  
375 Ethics Committee of Baoshan Branch of Shanghai First People's Hospital. Written  
376 informed consent was obtained from each participant before data collection.

377 **Provenance and peer review** Not commissioned; externally peer reviewed.

378 **Data sharing statement** The data sets generated and analysed during the current  
379 study are available from the corresponding author upon reasonable request.

380 **Open Access** This is an Open Access article distributed in accordance with the  
381 Creative Commons Attribution Non Commercial (CC BY-NC 4.0) license, which  
382 permits others to distribute, remix, adapt, build upon this work non-commercially, and  
383 license their derivative works on different terms, provided the original work is  
384 properly cited and the use is non-commercial.

1  
2  
3  
4 385 See: <http://creativecommons.org/licenses/by-nc/4.0/>

5  
6 386 © Article author(s) (or their employer(s) unless otherwise stated in the text of the  
7  
8  
9 387 article) 2018. All rights reserved. No commercial use is permitted unless otherwise  
10  
11  
12 388 expressly granted.

13  
14 389

15 390

16 390  
17 391 **REFERENCES**

18  
19 392 1. Li PK, Chow KM, Van de Luitgaarden MW, et al. Changes in the worldwide  
20  
21 393 epidemiology of peritoneal dialysis. *Nat Rev Nephrol* 2017;13:90-103.

22  
23 394 2. Jain AK, Blake P, Cordy P, et al. Global trends in rates of peritoneal dialysis. *J Am*  
24  
25 395 *Soc Nephrol* 2012;23:533-44.

26  
27 396 3. Cho Y, Johnson DW. Peritoneal dialysis-related peritonitis: towards improving  
28  
29 397 evidence, practices, and outcomes. *Am J Kidney Dis* 2014;64:278-89.

30  
31 398 4. Thirugnanasambathan T, Hawley CM, Badve SV, et al. Repeated peritoneal  
32  
33 399 dialysis-associated peritonitis: a multicenter registry study. *Am J Kidney Dis*  
34  
35 400 2012;59:84-91.

36  
37 401 5. Feng S, Wang Y, Qiu B, et al. Impact of early-onset peritonitis on mortality and  
38  
39 402 technique survival in peritoneal dialysis patients. *Springerplus* 2016;5:1676.

40  
41 403 6. Li P, Szeto C, Piraino B, et al. Peritoneal dialysis-related infections  
42  
43 404 recommendations: 2010 update. *Perit Dial Int* 2010;30:393-423.

44  
45 405 7. Béchade C, Guittet L, Evans D, et al. Early failure in patients starting peritoneal  
46  
47 406 dialysis: a competing risks approach. *Nephrol Dial Transplant* 2014;29:2127-35.

48  
49 407 8. Hsieh YP, Wang SC, Chang CC, et al. The negative impact of early peritonitis on  
50  
51 408 continuous ambulatory peritoneal dialysis patients. *Perit Dial Int* 2014;34:627-35.

52  
53 409 9. Fourtounas C, Savidaki E, Dousdabanis P, et al. Peritonitis during the first year  
54  
55 410 after commencement of peritoneal dialysis has an impact on technique survival and  
56  
57 411 patient morbidity. *Adv Perit Dial* 2006;22:50-4.

58  
59 412 10. Hsieh Y, Wang S, Chang C, et al. The negative impact of early peritonitis on  
60

- 1  
2  
3  
4 413 continuous ambulatory peritoneal dialysis patients. *Perit Dial Int* 2014;34:627-35.
- 5  
6 414 11. Barretti P, Doles J, Pinotti D, et al. Efficacy of antibiotic therapy for peritoneal  
7  
8 415 dialysis-associated peritonitis: a proportional meta-analysis. *BMC Infect Dis*  
9  
10 416 2014;14:445.
- 11  
12 417 12. Govindarajulu S, Hawley C, McDonald S, et al. Staphylococcus aureus peritonitis  
13  
14 418 in Australian peritoneal dialysis patients: predictors, treatment, and outcomes in  
15  
16 419 503 cases. *Perit Dial Int* 2010;30:311-9.
- 17  
18 420 13. Matuszkiewicz-Rowinska J. Update on fungal peritonitis and its treatment. *Perit*  
19  
20 421 *Dial Int* 2009;29 Suppl 2:S161-5.
- 21  
22 422 14. Szeto C, Chow K. Gram-negative peritonitis--the Achilles heel of peritoneal  
23  
24 423 dialysis? *Perit Dial Int* 2007;27 Suppl 2:S267-71.
- 25  
26 424 15. Li Z, An X, Mao H, et al. Association between depression and  
27  
28 425 malnutrition-inflammation complex syndrome in patients with continuous  
29  
30 426 ambulatory peritoneal dialysis. *Int Urol Nephrol* 2011;43:875-82.
- 31  
32 427 16. Fanali G, di Masi A, Trezza V, et al. Human serum albumin: from bench to  
33  
34 428 bedside. *Mol Aspects Med* 2012;33:209-90.
- 35  
36 429 17. Yu Z, Tan B, Dainty S, et al. Hypoalbuminaemia, systemic albumin leak and  
37  
38 430 endothelial dysfunction in peritoneal dialysis patients. *Nephrol Dial Transplant*  
39  
40 431 2012;27:4437-45.
- 41  
42 432 18. Wang Q, Bernardini J, Piraino B, et al. Albumin at the start of peritoneal dialysis  
43  
44 433 predicts the development of peritonitis. *Am J Kidney Dis* 2003;41:664-9.
- 45  
46 434 19. Mehrotra R, Duong U, Jiwakanon S, et al. Serum albumin as a predictor of  
47  
48 435 mortality in peritoneal dialysis: comparisons with hemodialysis. *Am J Kidney Dis*  
49  
50 436 2011;58:418-28.
- 51  
52 437 20. Seo M, Choa M, You J, et al. Hypoalbuminemia, Low Base Excess Values, and  
53  
54 438 Tachypnea Predict 28-Day Mortality in Severe Sepsis and Septic Shock Patients  
55  
56 439 in the Emergency Department. *Yonsei Med J* 2016;57:1361-9.
- 57  
58 440 21. Mizuno T, Mizokami F, Fukami K, et al. The influence of severe  
59  
60

- 1  
2  
3  
4 441 hypoalbuminemia on the half-life of vancomycin in elderly patients with  
5  
6 442 methicillin-resistant *Staphylococcus aureus* hospital-acquired pneumonia. *Clin*  
7  
8 443 *Interv Aging* 2013;8:1323-8.
- 9  
10 444 22. Juneja M, Baidoo L, Schwartz M, et al. Geriatric inflammatory bowel disease:  
11  
12 445 phenotypic presentation, treatment patterns, nutritional status, outcomes, and  
13  
14 446 comorbidity. *Dig Dis Sci* 2012;57:2408-15.
- 15  
16 447 23. Don B, Kaysen G. Serum albumin: relationship to inflammation and nutrition.  
17  
18 448 *Semin Dial* 2004;17:432-7.
- 19  
20 449 24. Magnussen B, Oren Gradel K, Gorm Jensen T, et al. Association between  
21  
22 450 Hypoalbuminaemia and Mortality in Patients with Community-Acquired  
23  
24 451 Bacteraemia Is Primarily Related to Acute Disorders. *PLoS ONE*  
25  
26 452 2016;11:e0160466.
- 27  
28 453 25. Maitra S, Burkart J, Fine A, et al. Patients on chronic peritoneal dialysis for ten  
29  
30 454 years or more in North America. *Peritoneal Dialysis International Journal of the*  
31  
32 455 *International Society for Peritoneal Dialysis* 2000;20 Suppl 2:S127.
- 33  
34 456 26. Sakaci T, Ahabap E, Koc Y, et al. Clinical outcomes and mortality in elderly  
35  
36 457 peritoneal dialysis patients. *Clinics (Sao Paulo)* 2015;70:363-8.
- 37  
38 458 27. Valderrabano F, Jofre R, Lopez-Gomez JM. Quality of life in end-stage renal  
39  
40 459 disease patients. *Am J Kidney Dis* 2001;38:443-64.
- 41  
42 460 28. Joly D, Anglicheau D, Alberti C, et al. Octogenarians reaching end-stage renal  
43  
44 461 disease: cohort study of decision-making and clinical outcomes. *J Am Soc*  
45  
46 462 *Nephrol* 2003;14:1012-21.
- 47  
48 463 29. Tennankore KK, Bargman JM. Nutrition and the kidney: recommendations for  
49  
50 464 peritoneal dialysis. *Advances in Chronic Kidney Disease* 2013;20:190-201.
- 51  
52 465 30. Hsieh YP, Chang CC, Wen YK, et al. Predictors of Peritonitis and the Impact of  
53  
54 466 Peritonitis on Clinical Outcomes of Continuous Ambulatory Peritoneal Dialysis  
55  
56 467 Patients in Taiwan—10 Years' Experience in a Single Center. *Peritoneal Dialysis*  
57  
58 468 *International Journal of the International Society for Peritoneal Dialysis*  
59  
60

- 1  
2  
3  
4 469 2014;34:85.
- 5  
6 470 31. Szeto C, Kwan B, Chow K, et al. Predictors of residual renal function decline in  
7  
8 471 patients undergoing continuous ambulatory peritoneal dialysis. *Perit Dial Int*  
9  
10 472 2015;35:180-8.
- 11  
12 473 32. Vilar E, Farrington K. Emerging importance of residual renal function in  
13  
14 474 end-stage renal failure. *Semin Dial* 2011;24:487-94.
- 15  
16 475 33. Raimann J, Kitzler T, Levin N. Factors affecting loss of residual renal function(s)  
17  
18 476 in dialysis. *Contrib Nephrol* 2012;178:150-6.
- 19  
20 477 34. Harris S, Lamping D, Brown E, et al. Clinical outcomes and quality of life in  
21  
22 478 elderly patients on peritoneal dialysis versus hemodialysis. *Perit Dial Int*  
23  
24 479 2002;22:463-70.
- 25  
26 480 35. Tian Y, Xie X, Xiang S, et al. Risk Factors and Outcomes of Early-Onset  
27  
28 481 Peritonitis in Chinese Peritoneal Dialysis Patients. *Kidney Blood Press Res*  
29  
30 482 2017;42:1266-76.
- 31  
32 483 36. Wu H, Huang R, Yi C, et al. Risk Factors for Early-Onset Peritonitis in Southern  
33  
34 484 Chinese Peritoneal Dialysis Patients. *Perit Dial Int* 2016;36:640-46.
- 35  
36 485 37. van Diepen AT, van Esch S, Struijk DG, et al. The first peritonitis episode alters  
37  
38 486 the natural course of peritoneal membrane characteristics in peritoneal dialysis  
39  
40 487 patients. *Perit Dial Int* 2015;35:324-32.
- 41  
42 488 38. Panagoutsos S, Kantartzi K, Passadakis P, et al. Timely transfer of peritoneal  
43  
44 489 dialysis patients to hemodialysis improves survival rates. *Clin Nephrol*  
45  
46 490 2006;65:43-7.
- 47  
48  
49 491  
50  
51  
52 492  
53 493  
54 494  
55 495  
56 496  
57 497  
58  
59  
60

498

499

500

501

Table 1. Baseline characteristic of the study population

| Variable                              | Peritonitis-free<br>(N=144) | EOP<br>(N=74)     | LOP<br>(N=139)    | P value between<br>EOP and LOP | P value |
|---------------------------------------|-----------------------------|-------------------|-------------------|--------------------------------|---------|
| Age (years)                           | 63.18±13.91                 | 65.87±13.20       | 61.40±13.53       | 0.022                          | 0.075   |
| Gender (male, n, %)                   | 84 (58.3)                   | 37 (50.7)         | 90 (64.7)         | 0.047                          | 0.135   |
| Smoking (%)                           | 40 (27.8)                   | 22 (29.7)         | 31 (22.3)         | 0.233                          | 0.415   |
| Drinking (%)                          | 31 (21.5)                   | 20 (27.0)         | 32 (23.0)         | 0.517                          | 0.659   |
| Charlson comorbidity index score      | 3.76±1.51                   | 5.73±2.17         | 4.42±1.93         | <0.001                         | <0.001  |
| Body mass index (kg/m <sup>2</sup> )  | 23.55±3.76                  | 24.19±3.31        | 24.32±3.38        | 0.791                          | 0.174   |
| White blood cell (10 <sup>9</sup> /L) | 6.42±2.21                   | 8.33±2.67         | 7.13±2.53         | 0.001                          | <0.001  |
| Hemoglobin (g/L)                      | 83.67±17.70                 | 89.10±22.90       | 88.53±19.77       | 0.849                          | 0.059   |
| Serum calcium (mmol/L)                | 1.98±0.29                   | 2.14±0.41         | 2.11±0.33         | 0.514                          | 0.001   |
| Serum phosphorus (mmol/L)             | 1.77±0.55                   | 1.91±0.61         | 1.83±0.78         | 0.457                          | 0.349   |
| Serum potassium (mmol/L)              | 4.39±0.65                   | 4.41±0.74         | 4.39±0.80         | 0.865                          | 0.980   |
| Fasting blood glucose (mmol/L)        | 5.38±2.01                   | 6.49±2.93         | 6.09±2.10         | 0.261                          | 0.001   |
| TC (mmol/L)                           | 4.02 (3.36, 5.11)           | 4.59 (3.54, 6.06) | 4.43 (3.57, 5.70) | 0.537                          | 0.022   |
| TG (mmol/L)                           | 1.28 (0.97, 1.74)           | 1.30 (1.00, 2.39) | 1.24 (1.00, 2.17) | 0.469                          | 0.430   |
| HDL-C (mmol/L)                        | 1.11 (0.85, 1.33)           | 1.18 (0.97, 1.43) | 1.19 (0.98, 1.48) | 0.740                          | 0.042   |
| LDL-C (mmol/L)                        | 2.44 (1.94, 3.11)           | 2.65 (2.01, 3.25) | 2.38 (2.00, 3.09) | 0.238                          | 0.473   |
| Serum albumin (g/L)                   | 33.26±6.26                  | 30.01±7.15        | 33.37±4.92        | <0.001                         | <0.001  |
| Serum uric acid (mmol/L)              | 516.93±142.32               | 495.46±183.30     | 536.48±185.05     | 0.124                          | 0.231   |
| Serum creatinine (μmol/L)             | 792.38±315.96               | 749.77±268.11     | 660.42±302.69     | 0.034                          | 0.001   |
| Blood urea nitrogen (mmol/L)          | 28.38±10.17                 | 25.69±10.73       | 24.51±9.85        | 0.421                          | 0.005   |
| eGFR (ml/min/1.73 m <sup>2</sup> )    | 6.41±3.10                   | 6.84±3.82         | 8.48±4.13         | 0.005                          | <0.001  |
| Total Kt/V                            | 2.06 (1.69, 2.44)           | 2.10 (1.71, 2.54) | 2.33 (1.93, 3.04) | 0.008                          | 0.001   |
| Residual renal function               | 2.37 (0.43, 4.30)           | 1.98 (0.29, 3.82) | 3.72 (1.74, 5.03) | 0.003                          | 0.002   |
| Diabetes mellitus (%)                 | 64 (44.4)                   | 54 (73.0)         | 79 (56.8)         | 0.021                          | <0.001  |
| Hypertension (%)                      | 126 (87.5)                  | 66 (89.2)         | 116 (83.5)        | 0.258                          | 0.439   |
| Dyslipidemia (%)                      | 54 (37.5)                   | 41 (55.4)         | 74 (53.2)         | 0.762                          | 0.009   |
| Cardiovascular disease (%)            | 43 (29.9)                   | 30 (40.5)         | 51 (36.7)         | 0.582                          | 0.241   |
| Cerebrovascular disease (%)           | 21 (14.6)                   | 30 (40.5)         | 55 (39.6)         | 0.890                          | <0.001  |
| Calcium                               | 90 (62.5)                   | 44 (59.5)         | 72 (51.8)         | 0.285                          | 0.179   |
| Iron                                  | 73 (50.7)                   | 41 (55.4)         | 68 (48.9)         | 0.367                          | 0.664   |
| Anti-diabetic medications (%)         | 54 (37.5)                   | 38 (51.4)         | 46 (33.1)         | 0.009                          | 0.031   |
| Anti-hypertension medications (%)     | 124 (86.1)                  | 65 (87.8)         | 112 (80.6)        | 0.178                          | 0.284   |
| Lipid-lowering medications (%)        | 38 (26.4)                   | 36 (48.6)         | 61 (43.9)         | 0.506                          | 0.001   |
| Cause of ESKD                         |                             |                   |                   | 0.182                          | 0.008   |
| Glomerulonephritis (%)                | 57 (39.6)                   | 29 (39.2)         | 68 (48.9)         |                                |         |
| Diabetes (%)                          | 42 (29.2)                   | 34 (45.9)         | 46 (33.1)         |                                |         |
| Other (%)                             | 45 (31.3)                   | 11 (14.9)         | 25 (18.0)         |                                |         |
| Peritonitis episodes (%)              |                             |                   |                   | 0.006                          | 0.006   |
| 1                                     |                             | 17 (23.0)         | 57 (41.0)         |                                |         |
| 2                                     |                             | 16 (21.6)         | 35 (25.2)         |                                |         |
| ≥3                                    |                             | 41 (55.4)         | 47 (33.8)         |                                |         |

EOP, early-onset peritonitis; LOP, late-onset peritonitis; TC, total cholesterol; TG total triglyceride; HDL-C, high-density lipoprotein cholesterol; LDL-C, low-density lipoprotein cholesterol; GFR, glomerular filtration rate; ESKD, end stage kidney disease

502

503

504

Table 2. Organism and outcome of different vintages of peritonitis (n, %)

| Causative organisms          | Early-onset peritonitis<br>episodes (n) | Late-onset peritonitis<br>episodes (n) | P value |
|------------------------------|-----------------------------------------|----------------------------------------|---------|
| Causative organisms          |                                         |                                        |         |
| Gram-positive organisms      | 38 (51.4)                               | 9 (6.5)                                | <0.001  |
| Staphylococcus aureus        | 7 (18.4)                                | 0 (0.0)                                | 0.163   |
| Coagulase-negative           | 3 (7.9)                                 | 0 (0.0)                                | 0.384   |
| Staphylococcus               | 16 (42.1)                               | 8 (88.9)                               | 0.012   |
| Streptococcus species        | 4 (10.5)                                | 1 (11.1)                               | 0.959   |
| Enterococcus species         | 4 (10.5)                                | 0 (0.0)                                | 0.309   |
| Other Gram-positives         | 4 (10.5)                                | 0 (0.0)                                | 0.309   |
| Gram-negative organisms      | 20 (27.0)                               | 4 (2.9)                                | <0.001  |
| Escherichia coli             | 8 (40.0)                                | 0 (0.0)                                | 0.121   |
| Klebsiella species           | 6 (30.0)                                | 1 (25.0)                               | 0.841   |
| Acinetobacter species        | 4 (20.0)                                | 1 (25.0)                               | 0.822   |
| Pseudomonas Aeruginosa       | 2 (10.0)                                | 1 (25.0)                               | 0.408   |
| Other Gram-negatives         | 0 (0.0)                                 | 1 (25.0)                               | 0.022   |
| Fungi                        | 4 (5.4)                                 | 2 (1.4)                                | 0.096   |
| Multiple organisms           | 1 (1.4)                                 | 0 (0.0)                                | 0.170   |
| Culture-negative peritonitis | 11 (14.9)                               | 124 (89.2)                             | <0.001  |
| Outcomes                     |                                         |                                        | 0.063   |
| Complete cure                | 13 (17.6)                               | 47 (33.8)                              |         |
| Relapse or recurrence        | 25 (33.8)                               | 45 (32.4)                              |         |
| Transfer to hemodialysis     | 20 (27.0)                               | 27 (19.4)                              |         |
| Death                        | 16 (21.6)                               | 20 (14.4)                              |         |

505

506

507

508

509

510

511

512

513

514

515

516

517

518

519

520

521

522

523

Table 3. Cox proportional hazards model for technique failure and patient mortality. The analyzed variables included age, sex, time to first peritonitis (EOP vs. LOP), serum albumin, Charlson comorbidity index score, diabetes, eGFR

| Variable                                | Univariate Cox regression analysis |             |         | Multivariate Cox regression analysis |             |         |
|-----------------------------------------|------------------------------------|-------------|---------|--------------------------------------|-------------|---------|
|                                         | HR                                 | (95%CI)     | P value | HR                                   | (95%CI)     | P value |
| Technique failure                       |                                    |             |         |                                      |             |         |
| Time to first peritonitis (EOP vs. LOP) | 1.872                              | 1.201-2.919 | 0.006   | 1.664                                | 1.003-2.761 | 0.048   |
| Serum albumin                           | 0.967                              | 0.935-0.999 | 0.041   | 0.988                                | 0.949-1.029 | 0.557   |
| Age                                     | 1.018                              | 1.003-1.034 | 0.020   | 1.008                                | 0.991-1.026 | 0.371   |
| Sex (men vs. women)                     | 0.965                              | 0.649-1.435 | 0.860   |                                      |             |         |
| Charlson comorbidity index score        | 1.078                              | 0.986-1.177 | 0.098   |                                      |             |         |
| Diabetes                                | 1.380                              | 0.918-2.072 | 0.121   |                                      |             |         |
| eGFR                                    | 0.979                              | 0.928-1.031 | 0.418   |                                      |             |         |
| Patient mortality                       |                                    |             |         |                                      |             |         |
| Time to first peritonitis (EOP vs. LOP) | 1.968                              | 1.006-3.851 | 0.048   | 1.499                                | 0.683-3.289 | 0.313   |
| Serum albumin                           | 0.949                              | 0.907-0.993 | 0.025   | 0.961                                | 0.902-1.023 | 0.214   |
| Age                                     | 1.037                              | 1.014-1.061 | 0.002   | 1.014                                | 0.987-1.041 | 0.316   |
| Sex (men vs. women)                     | 0.862                              | 0.498-1.492 | 0.596   |                                      |             |         |
| Charlson comorbidity index score        | 0.999                              | 0.878-1.138 | 0.990   |                                      |             |         |
| Diabetes                                | 1.176                              | 0.672-2.057 | 0.570   |                                      |             |         |
| eGFR                                    | 0.935                              | 0.860-1.016 | 0.111   |                                      |             |         |

524

525

526

527

528

529

530

531

532

533

534

535

536

537

538

539

540

541



542

543

544

545

546

Table 4. Logistic regression analysis of factors associated with early-onset peritonitis

| Variable                         | Univariate logistic regression analysis |             |         | Multivariate logistic regression analysis |             |         |
|----------------------------------|-----------------------------------------|-------------|---------|-------------------------------------------|-------------|---------|
|                                  | OR                                      | (95%CI)     | P value | OR                                        | (95%CI)     | P value |
| Sex (men vs. women)              | 0.560                                   | 0.315-0.995 | 0.048   | 0.712                                     | 0.353-1.435 | 0.342   |
| Age                              | 1.026                                   | 1.004-1.049 | 0.023   | 1.027                                     | 1.001-1.054 | 0.041   |
| Body mass index                  | 0.988                                   | 0.906-1.078 | 0.790   |                                           |             |         |
| Charlson comorbidity index score | 1.355                                   | 1.173-1.566 | <0.001  | 1.298                                     | 1.069-1.574 | 0.008   |
| Diabetes                         | 2.051                                   | 1.111-3.786 | 0.022   | 1.260                                     | 0.556-2.856 | 0.579   |
| Serum albumin                    | 0.901                                   | 0.853-0.951 | <0.001  | 0.929                                     | 0.876-0.986 | 0.015   |
| eGFR                             | 0.888                                   | 0.815-0.967 | 0.006   | 0.907                                     | 0.825-0.998 | 0.046   |

547

548

549

550

551

552

553

554

555

556

557

558

559

560

561

562

563

564

565

566

567

568

569

570

571

572

573

574

1  
2  
3 575

4 576

5 577

6 578

7 579 **Figure legends**

8 580

9 581 Fig.1. Technique survival according to EOP and LOP.

10 582

11 583 Fig.2. Patient survival according to EOP and LOP.

12 584

13 585

14 586

15  
16  
17  
18  
19  
20  
21  
22  
23  
24  
25  
26  
27  
28  
29  
30  
31  
32  
33  
34  
35  
36  
37  
38  
39  
40  
41  
42  
43  
44  
45  
46  
47  
48  
49  
50  
51  
52  
53  
54  
55  
56  
57  
58  
59  
60

For peer review only

1  
2  
3  
4  
5  
6  
7  
8  
9  
10  
11  
12  
13  
14  
15  
16  
17  
18  
19  
20  
21  
22  
23  
24  
25  
26  
27  
28  
29  
30  
31  
32  
33  
34  
35  
36  
37  
38  
39  
40  
41  
42  
43  
44  
45  
46  
47  
48  
49  
50  
51  
52  
53  
54  
55  
56  
57  
58  
59  
60

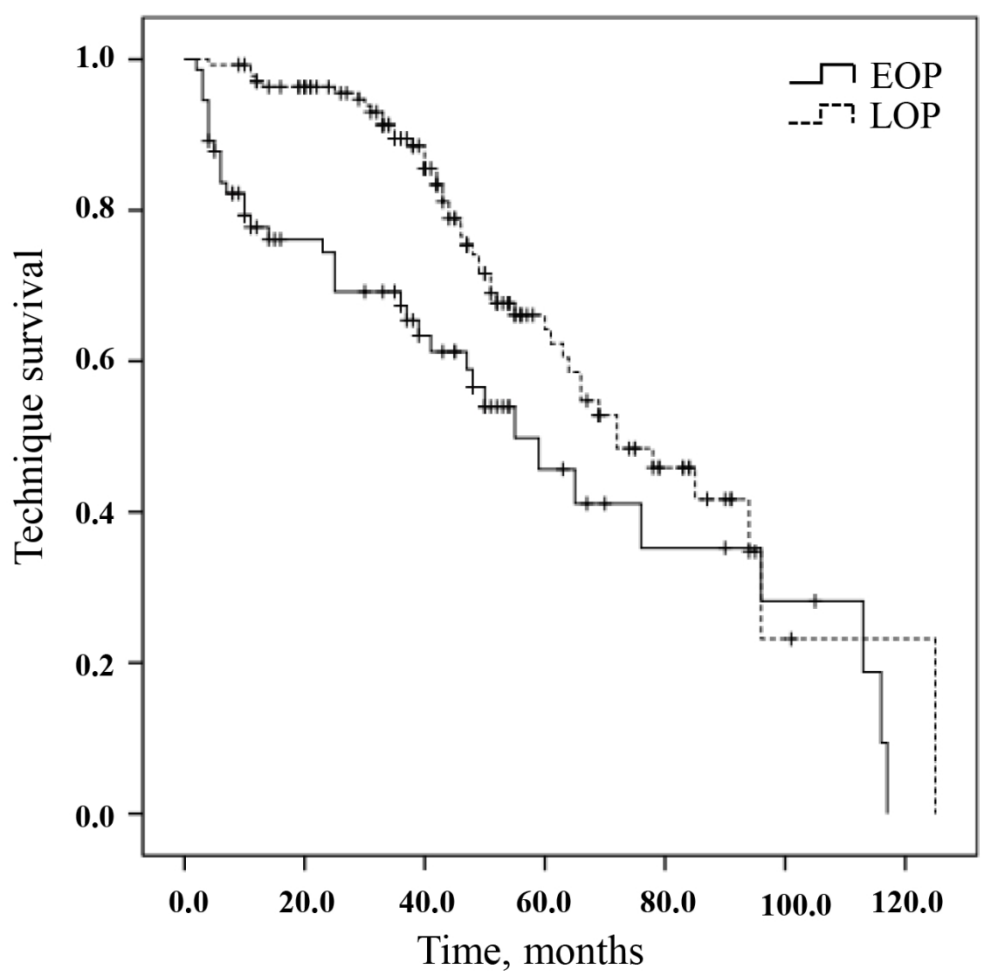

Fig.1. Technique survival according to EOP and LOP.

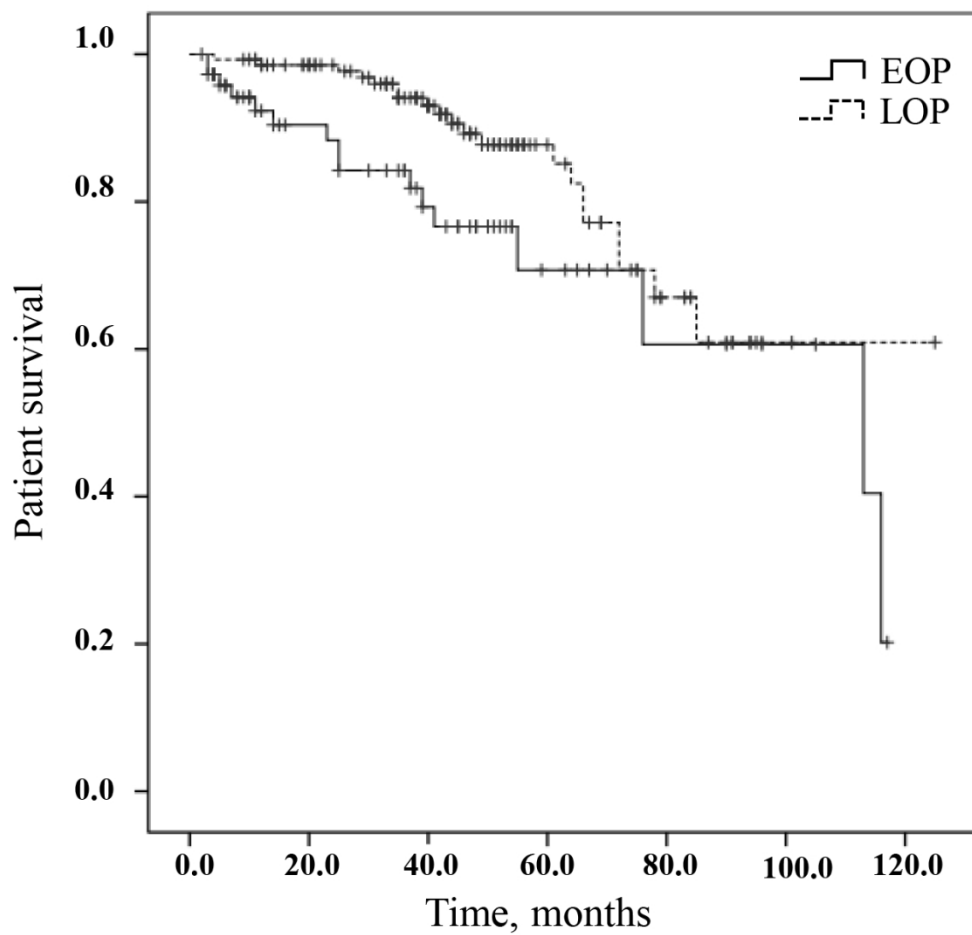

Fig.2. Patient survival according to EOP and LOP.

# BMJ Open

**The analysis of risk factors and outcome in peritoneal dialysis patients with early-onset peritonitis: a multi-center, retrospective, cohort study.**

|                                 |                                                                                                                                                                                                                                                                                                                                                                                                                                                                                                                                                                                                                                                                                                                                                                                                                                                                                                                                  |
|---------------------------------|----------------------------------------------------------------------------------------------------------------------------------------------------------------------------------------------------------------------------------------------------------------------------------------------------------------------------------------------------------------------------------------------------------------------------------------------------------------------------------------------------------------------------------------------------------------------------------------------------------------------------------------------------------------------------------------------------------------------------------------------------------------------------------------------------------------------------------------------------------------------------------------------------------------------------------|
| Journal:                        | <i>BMJ Open</i>                                                                                                                                                                                                                                                                                                                                                                                                                                                                                                                                                                                                                                                                                                                                                                                                                                                                                                                  |
| Manuscript ID                   | bmjopen-2019-029949.R1                                                                                                                                                                                                                                                                                                                                                                                                                                                                                                                                                                                                                                                                                                                                                                                                                                                                                                           |
| Article Type:                   | Original research                                                                                                                                                                                                                                                                                                                                                                                                                                                                                                                                                                                                                                                                                                                                                                                                                                                                                                                |
| Date Submitted by the Author:   | 03-Jul-2019                                                                                                                                                                                                                                                                                                                                                                                                                                                                                                                                                                                                                                                                                                                                                                                                                                                                                                                      |
| Complete List of Authors:       | Ma, Xiaoyan; Shanghai East Hospital, Department of Nephrology<br>Shi, Yingfeng; Shanghai East Hospital, Department of Nephrology<br>Tao, Min; Shanghai East Hospital, Department of Nephrology<br>Jiang, Xiaolu; Shanghai East Hospital, Department of Nephrology<br>Wang, Yi; Shanghai East Hospital, Department of Nephrology<br>Zang, Xiujuan; Department of Nephrology, Shanghai Songjiang District Central Hospital<br>Fang, Lu; Shanghai East Hospital, Department of Nephrology<br>Jiang, Wei; Shanghai East Hospital, Department of Nephrology<br>Du, Lin; Shanghai East Hospital, Department of Nephrology<br>Jin, Dewei; Shanghai East Hospital, Department of Nephrology<br>Zhuang, Shougang; Shanghai East Hospital, Department of Nephrology;<br>Rhode Island Hospital, Department of Medicine<br>Liu, Na; Department of Nephrology, Shanghai East Hospital, Tongji University School of Medicine, Shanghai, China, |
| <b>Primary Subject Heading</b>: | Renal medicine                                                                                                                                                                                                                                                                                                                                                                                                                                                                                                                                                                                                                                                                                                                                                                                                                                                                                                                   |
| Secondary Subject Heading:      | Patient-centred medicine                                                                                                                                                                                                                                                                                                                                                                                                                                                                                                                                                                                                                                                                                                                                                                                                                                                                                                         |
| Keywords:                       | Peritoneal dialysis, Early-onset peritonitis, Risk factors, Outcomes                                                                                                                                                                                                                                                                                                                                                                                                                                                                                                                                                                                                                                                                                                                                                                                                                                                             |
|                                 |                                                                                                                                                                                                                                                                                                                                                                                                                                                                                                                                                                                                                                                                                                                                                                                                                                                                                                                                  |

SCHOLARONE™  
Manuscripts

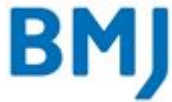

I, the Submitting Author has the right to grant and does grant on behalf of all authors of the Work (as defined in the below author licence), an exclusive licence and/or a non-exclusive licence for contributions from authors who are: i) UK Crown employees; ii) where BMJ has agreed a CC-BY licence shall apply, and/or iii) in accordance with the terms applicable for US Federal Government officers or employees acting as part of their official duties; on a worldwide, perpetual, irrevocable, royalty-free basis to BMJ Publishing Group Ltd ("BMJ") its licensees and where the relevant Journal is co-owned by BMJ to the co-owners of the Journal, to publish the Work in this journal and any other BMJ products and to exploit all rights, as set out in our [licence](#).

The Submitting Author accepts and understands that any supply made under these terms is made by BMJ to the Submitting Author unless you are acting as an employee on behalf of your employer or a postgraduate student of an affiliated institution which is paying any applicable article publishing charge ("APC") for Open Access articles. Where the Submitting Author wishes to make the Work available on an Open Access basis (and intends to pay the relevant APC), the terms of reuse of such Open Access shall be governed by a Creative Commons licence – details of these licences and which [Creative Commons](#) licence will apply to this Work are set out in our licence referred to above.

Other than as permitted in any relevant BMJ Author's Self Archiving Policies, I confirm this Work has not been accepted for publication elsewhere, is not being considered for publication elsewhere and does not duplicate material already published. I confirm all authors consent to publication of this Work and authorise the granting of this licence.

1  
2  
3  
4 1 **The analysis of risk factors and outcome in peritoneal dialysis patients with**  
5  
6 2 **early-onset peritonitis: a multi-center, retrospective, cohort study.**

7  
8 3 Xiaoyan Ma<sup>1\*</sup>, Yingfeng Shi<sup>1\*</sup>, Min Tao<sup>1\*</sup>, Xiaolu Jiang<sup>1\*</sup>, Yi Wang<sup>1</sup>, Xiujuan Zang<sup>2</sup>,  
9  
10 4 Lu Fang<sup>1</sup>, Wei Jiang<sup>1</sup>, Lin Du<sup>1</sup>, Dewei Jin<sup>1</sup>, Shougang Zhuang<sup>1,3</sup>, Na Liu<sup>1</sup>

11  
12 5  
13  
14 6  
15  
16 7 <sup>1</sup>Department of Nephrology, Shanghai East Hospital, Tongji University School of  
17  
18 8 Medicine, Shanghai, China; <sup>2</sup>Department of Nephrology, Shanghai Songjiang District  
19  
20 9 Central Hospital, Shanghai, China; <sup>3</sup>Department of Medicine, Rhode Island Hospital  
21  
22 10 and Brown University School of Medicine, Providence, RI, USA

23  
24 11  
25  
26 12 \*These authors make an equal contribution to this study.

27  
28 13  
29  
30 14 **Corresponding author: Na Liu**, M.D., Ph.D., Department of Nephrology, Shanghai  
31  
32 15 East Hospital, Tongji University School of Medicine, 150 Jimo road, Pudong new  
33  
34 16 district, Shanghai 200120, China. **E-mail:** naliubrown@163.com.

1  
2  
3  
4 29 **ABSTRACT**

5 30 **Objectives** To investigate the risk factors associated with early-onset peritonitis  
6  
7  
8 31 (EOP) and its influence on patients' technique survival and mortality.

9  
10 32 **Study design** Retrospective, cohort study.

11  
12 33 **Setting** Three peritoneal dialysis units in Shanghai.

13  
14 34 **Participants** PD patients from June 1, 2006, to May 1, 2018, were recruited and  
15  
16 35 followed up until December 31, 2018. According to time-to-first episode of  
17  
18 36 peritonitis, patients were divided into non-peritonitis (n=144), early-onset peritonitis  
19  
20 37 ( $\leq 6$  months, n=74) and late-onset peritonitis (LOP) ( $> 6$  months, n=139).

21  
22 38 **Primary and secondary outcome measures** EOP was defined as the first episode of  
23  
24 39 peritonitis occurring within 6 months after the initiation of peritoneal dialysis (PD).  
25  
26 40 The outcomes were all-cause mortality and technique failure.

27  
28 41 **Results** Of the 357 patients, 74 (20.7%) patients developed their first episode of  
29  
30 42 peritonitis within the first 6 months. Compared with the LOP group, the EOP group  
31  
32 43 had older ages, more female patients, higher Charlson comorbidity index (CCI) score,  
33  
34 44 lower serum albumin levels and renal function at the time of initiation of PD and  
35  
36 45 higher diabetes mellitus and peritonitis rates ( $P<0.05$ ). Staphylococcus was the most  
37  
38 46 common Gram-positive organism in both EOP and LOP groups. The multivariate  
39  
40 47 logistic regression analysis showed that factors associated with EOP included a higher  
41  
42 48 CCI score (odds ratio (OR) 1.318,  $P=0.008$ ), lower serum albumin level (OR 0.926,  
43  
44 49  $P=0.021$ ) and lower Kt/V (OR 0.631,  $P=0.035$ ) at start of PD. In the Cox proportional  
45  
46 50 hazards model, EOP was the only predictor of technique failure (hazard ratio (HR)  
47  
48 51 1.801,  $P=0.051$ ). There was no difference between EOP and LOP for all-cause  
49  
50 52 mortality.

51  
52 53 **Conclusion** A higher CCI score and lower serum albumin level and Kt/V at PD  
53  
54 54 initiation were significantly associated with EOP. EOP also predicted a high  
55  
56 55 peritonitis rate and poor clinical outcomes.

57  
58  
59 56  
60



1  
2  
3  
4 57 **KEY WORDS** Peritoneal dialysis; Early-onset peritonitis; Risk factors; Outcomes.  
5  
6

7  
8  
9  
10 58

## 11 59 **ARTICLE SUMMARY**

### 12 60 **Article focus**

- 13 61 ● The risk factors associated with EOP and its influence on patients' technique  
14  
15 62 survival and mortality.

### 16 63 **Key messages**

- 17  
18 64 ● A higher CCI score and lower serum albumin level and Kt/V at PD initiation  
19  
20 65 were significantly associated with EOP.  
21  
22 66 ● EOP predicted a high peritonitis rate and poor clinical outcomes.  
23  
24  
25  
26  
27  
28

### 29 67 **Strengths and limitations of this study**

- 30  
31 68 ● There is a strict exclusion criteria based on PD histories.  
32  
33 69 ● We conducted a multi-center study which ensured sufficient power in obtaining  
34  
35 70 the risk factors of EOP.  
36  
37 71 ● This was a retrospective cohort study, lacking of some objective information such  
38  
39 72 as education level, economic development and living standard, which may cause  
40  
41 73 bias.  
42  
43 74 ● The study did not compare the risk factors of EOP between male and female  
44  
45 75 patients.  
46  
47 76 ● Although this was a multicenter study, the sample size was relatively small.  
48  
49  
50  
51  
52  
53  
54  
55  
56  
57  
58  
59  
60

## 79 INTRODUCTION

80 In developing countries, the number of peritoneal dialysis (PD) patients has been  
81 increasing over time.<sup>1 2</sup> Peritoneal dialysis (PD)-related peritonitis is a serious  
82 complication during PD therapy and remains the major reason for technique failure.<sup>3</sup>  
83 Severe and prolonged peritonitis leads to structural and functional alterations of the  
84 peritoneal membrane, eventually leading to peritoneal fibrosis.<sup>4</sup> Therefore, finding the  
85 risk factors for peritonitis in the early stage of PD would help to reduce technique  
86 failures and mortality of PD.

87 The definition of early-onset peritonitis varies widely between studies, which  
88 generally refers to peritoneal dialysis related peritonitis occurring within 3-24 months  
89 after surgical catheterization.<sup>5-8</sup> Previous studies showed that the first episode of  
90 peritonitis in PD patients could significantly affect the prognosis of end-stage renal  
91 disease (ESRD) patients.<sup>9</sup> However, few studies have specifically examined the risk  
92 factors for peritonitis in the early PD period. And most of these were observational  
93 cohort studies carried out in single centers,<sup>5 10 11</sup> limiting the generalizability of their  
94 observed outcomes. To determine the risk factors for early-onset peritonitis in  
95 Chinese CKD patients and its influence on patients' technique survival and mortality,  
96 we conducted this multiple-center, retrospective cohort study.

## 98 METHODS

### 99 Study Population

100 This was a multi-center retrospective cohort study included 357 patients with ESRD  
101 who underwent PD in Department of Nephrology in Baoshan branch of Shanghai  
102 First People's Hospital, Shanghai Songjiang District Central Hospital and Shanghai  
103 East Hospital, Tongji University School of Medicine. All incident PD patients from  
104 June 1, 2006, to May 1, 2018, were recruited and followed up until December 31,  
105 2018. Before PD initiation, the patients signed the informed consents for treatment  
106 strategy and agreed to share the treatment information to the hospital database in case  
107 of the late follow-up. This study was conducted according to the guidelines of the

1  
2  
3  
4 108 Helsinki Declaration. And we apply for the agreements from the human research  
5  
6 109 ethics committees of the three hospitals. After that we collected the information from  
7  
8 110 the hospital databases. The exclusion criteria were as follows: patients who had been  
9  
10 111 using PD for fewer than 90 days, patients with an age younger than 18 years and  
11  
12 112 patients who initiated PD in other PD centers and previously accepted HD or kidney  
13  
14 113 transplantation. There are 19 PD patients suffer the peritonitis within the first 3  
15  
16 114 months, 6 subjects died, 3 patients transferred to hemodialysis, 0 patients underwent  
17  
18 115 renal transplantation, 10 patients continued peritoneal dialysis. While these 10 PD  
19  
20 116 patients lacked of the information of peritoneal equilibration test. Patients were  
21  
22 117 followed until any of the following events: death, a change to HD, renal  
23  
24 118 transplantation or until December 31, 2018. According to the Chinese Peritoneal  
25  
26 119 Dialysis Guideline, we adopted standardized surgical catheterization technique.<sup>12</sup> We  
27  
28 120 chose Tenckhoff silicone tube with double polyester sleeve. Double-purse string  
29  
30 121 suture or double-layer suture was adopted to fix the catheter. Fine needle and thick  
31  
32 122 line were used to prevent peripheral tube leakage. The exit direction of catheter tunnel  
33  
34 123 was downward and outward, and the outer polyester sleeve was 2 to 3 cm away from  
35  
36 124 the exit. All the surgical operations are performed in the operating room. The single  
37  
38 125 dose intravenous antibiotic 30 minutes before surgery is recommended to prevent  
39  
40 126 infection.<sup>13</sup> The first or second generation cephalosporin is suggested.<sup>13 14</sup> According  
41  
42 127 to the ISPD peritonitis recommendations,<sup>13-15</sup> we topical apply mupirocin ointment  
43  
44 128 to the catheter exit site once a day to prevent exit site infection. Patients initiated PD  
45  
46 129 by Dianeal with 1.5% or 2.5% dextrose (Baxter Healthcare, Guangzhou, China).  
47  
48 130 Dialysate concentration was 1.5% dextrose and replaced every four hours during the  
49  
50 131 day, while 2.5% at night and kept in the body. A total of 213 patients who had at least  
51  
52 132 one episode of peritonitis. According to time-to-first episode of peritonitis, patients  
53  
54 133 were divided into non-peritonitis (n=144), early-onset peritonitis ( $\leq$  6 months, n=74)  
55  
56 134 and late-onset peritonitis ( $>$  6 months, n=139). We collected baseline characteristics  
57  
58 135 within 1-3 months from the start of PD, including demographic data (age, gender,  
59  
60

1  
2  
3  
4 136 smoking, drinking, CCI, BMI), medical history, drug-taking history, biochemical data  
5  
6 137 (hemoglobin, serum electrolyte, fasting blood glucose, total cholesterol, total  
7  
8 138 triglyceride, high-density lipoprotein cholesterol, low-density lipoprotein cholesterol,  
9  
10 139 and serum albumin, uric acid, creatinine, blood urea nitrogen, estimated glomerular  
11  
12 140 filtration rate (eGFR), the clearance rate of urea nitrogen (Kt/V), cause of ESRD,  
13  
14 141 peritonitis episodes. Peritoneal fluid effluent from patients with peritonitis was  
15  
16 142 collected and cultured for 1 to 5 days to identify the bacterial flora in the dialysate.  
17

18 143

#### 19 20 144 **Primary and secondary outcome measures**

21  
22 145 Early-onset peritonitis was defined as the first episode of peritonitis occurring within  
23  
24 146 6 months after the initiation of peritoneal dialysis (PD). This definition is consistent  
25  
26 147 with other published article.<sup>8 16</sup> The outcomes were all-cause mortality and technique  
27  
28 148 failure.  
29

30 149

#### 31 32 150 **Study definitions**

33  
34 151 Diagnostic criteria for peritonitis based on the 2010 International Society for  
35  
36 152 Peritoneal Dialysis (ISPD) guidelines.<sup>15</sup> Patients diagnosed as peritonitis should meet  
37  
38 153 at least two of the following three standards: (1) Clinical symptoms or signs of  
39  
40 154 peritonitis; (2) Leucocyte count (at least 100/mm<sup>3</sup>) and polymorphonuclear  
41  
42 155 neutrophilic cells proportion (at least 50%) in peritoneal fluid effluent; (3) Related  
43  
44 156 pathogens in smear or culture of peritoneal fluid. Early-onset peritonitis was defined  
45  
46 157 as the first episode of peritonitis occurring within 6 months after the initiation of PD.  
47  
48 158 The outcomes were all-cause mortality and technique failure. Death was an end-point  
49  
50 159 event in the patient survival analysis. Relapse was defined as an episode occurring  
51  
52 160 within 4 weeks of completion of therapy of a prior episode with the same organism,<sup>13</sup>  
53  
54 161 recurrence referred to an episode occurring within 4 weeks of completion of therapy  
55  
56 162 of a prior episode but with a different organism.<sup>13</sup> Instead of transfer to HD therapy  
57  
58 163 permanently, both relapse and recurrence were treated by antibiotics and continued  
59  
60

1  
2  
3  
4 164 PD treatment. Complete cure was defined as the resolution of peritonitis without  
5  
6 165 relapse or recurrence by antibiotics alone.<sup>7</sup> However, some of refractory peritonitis  
7  
8 166 failed to clear up effluent after 5 days of appropriate antibiotics and transferred to HD  
9  
10 167 permanently. We classify this part of patients into “transfer to hemodialysis”. Other  
11  
12 168 parts of HD patients were due to the serious tunnel infection with peritonitis and  
13  
14 169 ultrafiltration failure induced by encapsulating peritoneal sclerosis. Patients who  
15  
16 170 transferred to HD were censored from the patient survival analysis, and death was  
17  
18 171 censored for technique failure. Technique failure was defined as the transfer to HD  
19  
20 172 therapy permanently (lasted for 30 days or more) due to ultrafiltration failure,  
21  
22 173 peritonitis, exit-site infection and other operational problems.<sup>17</sup>  
23  
24  
25

#### 26 175 **Patient and public involvement**

27  
28 176 No patient was involved in the design or conduct of the study, but the results of the  
29  
30 177 study will be shared to patients coming for follow-up.  
31  
32  
33

#### 34 179 **Statistical analysis**

35  
36 180 All statistical analyses were performed by SPSS 20.0 for Windows (IBM Corp.,  
37  
38 181 Armonk, NY, USA). The normal distributed data were showed as mean±standard  
39  
40 182 deviation (SD) and the skewed data were showed as median values with the 25th to  
41  
42 183 75th percentile intervals. Categorical data were expressed as frequency (n) and  
43  
44 184 percentage (%). As for normally distributed data, student's t-test is using for  
45  
46 185 analyzing the differences between the EOP group and LOP group, while one-way  
47  
48 186 ANOVA for differences among in non-peritonitis, EOP group and LOP groups. The  
49  
50 187 Wilcoxon rank sum test for skewed continuous data and the Chi-square test or  
51  
52 188 Fisher's exact test for categorical data. The Kaplan-Meier survival curves were drawn  
53  
54 189 for each event of interest (technique survival and patient survival) and the log-rank  
55  
56 190 test was used to compare curves. Univariate Cox proportional hazards regression was  
57  
58 191 used to select significant factors associated with study outcomes. Variables whose  
59  
60

1  
2  
3  
4 192  $P < 0.10$  were selected for inclusion in the final multivariate Cox model. Multivariate  
5  
6 193 logistic regression was calculated to select significant risk factors for EOP and the  
7  
8 194 inclusion standard was also  $P < 0.10$ . Collinearity of variables was tested. A two-tailed  
9  
10 195  $P$  value  $< 0.05$  was considered statistically significant.

11  
12 196

## 13 14 197 **RESULTS**

### 15 16 198 **Patient Characteristics**

17  
18 199 A total of 357 patients with ESRD underwent CAPD in three dialysis centers in  
19  
20 200 Shanghai during the study period. All patients used Dianeal with 1.5% or 2.5%  
21  
22 201 dextrose. The first episode of peritonitis was experienced by 74 (20.7%) patients  
23  
24 202 within 6 months after the start of PD. 11 (11/61) in Shanghai East Hospital, 22  
25  
26 203 (22/142) in Shanghai Songjiang District Central Hospital, 41 (41/154) in Baoshan  
27  
28 204 branch of Shanghai First People's Hospital. Median follow-up time for the 357  
29  
30 205 patients was 33.0 months (interquartile range 14.0-50.0 months). There were 211  
31  
32 206 males (59.1%) with an average age of  $61.6 \pm 14.0$  years, and 145 females (40.9%)  
33  
34 207 with an average age of  $65.3 \pm 12.9$  years. The most common primary renal diseases  
35  
36 208 were chronic glomerulonephritis (43.1%) and diabetic nephropathy (34.2%).  
37  
38 209 Compared with the LOP patients, the EOP patient group had older ages, more female  
39  
40 210 patients, higher Charlson comorbidity index (CCI) score and lower serum albumin  
41  
42 211 levels, renal function and Kt/V at the time of initiation of PD and higher diabetes  
43  
44 212 mellitus and peritonitis rates ( $P < 0.05$ ). Additional demographic and laboratory  
45  
46 213 characteristics of the study population are present in Table 1.

47  
48 214

### 49 50 215 **Causative organisms**

51  
52 216 In table 2, among 213 patients with peritonitis, 47 (22.1%) were due to Gram-positive  
53  
54 217 organisms, 24 (11.3%) were due to Gram-negative organisms, 6 (2.8%) were due to  
55  
56 218 fungi, 1 (0.4%) were due to multiple organisms, and 135 (63.4%) were  
57  
58 219 culture-negative. Staphylococcus was the most common Gram-positive organism in  
59  
60

220 both groups. Compared with the EOP patient group, the LOP patient group had more  
221 culture-negative peritonitis (89.2% vs. 14.9%,  $P<0.001$ ). The incidences of  
222 culture-negative peritonitis were 37.1% (13/35) in Shanghai East Hospital, 71.7%  
223 (38/53) in Shanghai Songjiang District Central Hospital, 67.2% (84/125) in Baoshan  
224 branch of Shanghai First People's Hospital ( $P=0.002$ ).

225

### 226 **Outcomes**

227 The total peritonitis rate was 0.490 episodes per patient-year (213 patients presented  
228 509 episodes of peritonitis during 1039.58 patient-years of follow-up). The peritonitis  
229 rates in Shanghai East Hospital, Shanghai Songjiang District Central Hospital and  
230 Baoshan Branch of Shanghai First People's Hospital were 0.41, 0.31 and 0.61  
231 episodes per patient-year respectively. Early-onset first episode of peritonitis had a  
232 lower cure rate (17.6% vs 33.8%, Table 2.), higher rate of transferring to  
233 hemodialysis (27.0% vs 19.4%, Table 2.), and higher mortality (21.6% vs 14.4%,  
234 Table 2.) compared to late-onset first episode of peritonitis.

235

### 236 **Technique failure**

237 The variables including time to first peritonitis (EOP vs. LOP), age, sex, smoking,  
238 drinking, CCI, BMI, hemoglobin, total cholesterol, total triglyceride, serum albumin,  
239 eGFR, total Kt/V and diabetes, were calculated into the cox proportional hazards  
240 model for technique failure. And we found that EOP was significantly associated with  
241 technique failure compared with the LOP group, with a hazard ratio (HR) of 1.801  
242 (Table 3,  $P=0.051$ ). Kaplan-Meier analysis showed that compared with LOP group,  
243 technique survival was lower in the EOP group (Log rank 3.943,  $P=0.047$ , Fig.1).

244

### 245 **All-cause mortality**

246 During the study period, a total of 52 peritonitis patients died: 16 patients in the EOP  
247 group and 20 patients in the LOP group. Variables with  $P$  value  $< 0.10$  in univariate

1  
2  
3  
4 248 Cox regression analysis, including the time to first peritonitis (EOP vs. LOP), age,  
5  
6 249 serum albumin and total Kt/V, were chosen for further adjustment in multivariate Cox  
7  
8 250 proportional hazards model. After adjustment, there was no significant difference  
9  
10 251 between the EOP and LOP groups (Table 3). Fig. 2 describes cumulative survival by  
11  
12 252 EOP and LOP groups using the Kaplan-Meier analysis. Compared with LOP group,  
13  
14 253 cumulative survival was lower in the EOP group (Log rank 4.060,  $P=0.044$ ).  
15  
16 254

### 17 18 255 **Risk factors of early-onset peritonitis**

19  
20 256 Variables in Table 1 were tried in a univariate logistic regression model, and only  
21  
22 257 variables with  $P$  value  $< 0.10$  for peritonitis were depicted in Table 4. Based on the  
23  
24 258 simple logistic regression analysis of risk factors associated with EOP, we constructed  
25  
26 259 a multiple logistic regression model using variables including gender, age, CCI score,  
27  
28 260 diabetes, serum albumin, eGFR and Kt/V. We found that higher CCI score  
29  
30 261 (OR=1.318, 95%CI 1.075-1.615,  $P=0.008$ ), lower serum albumin level (OR=0.926,  
31  
32 262 95%CI 0.868-0.989,  $P=0.021$ ) and Kt/V (OR=0.631, 95%CI 0.411-0.969,  $P=0.035$ ) at  
33  
34 263 the start of PD, were significantly associated with EOP (Table 4).  
35  
36 264

### 37 38 265 **DISCUSSION**

39  
40  
41 266 Our retrospective cohort study of 357 PD patients showed that 74 (20.7%) patients in  
42  
43 267 three Shanghai dialysis centers developed the first episodes of peritonitis within the  
44  
45 268 first 6 months. Higher CCI score, lower serum albumin level and Kt/V at the start of  
46  
47 269 PD, were significantly associated with EOP. In addition, an early peritonitis onset  
48  
49 270 predicted a high peritonitis rate and technique failure.

50  
51 271 Early-onset peritonitis is a major complication of peritoneal dialysis, directly or  
52  
53 272 indirectly causing the abandon of dialysis treatment. In this study, among 213 patients  
54  
55 273 with peritonitis, 47 (22.1%) were due to Gram-positive organisms, 24 (11.3%) were  
56  
57 274 due to Gram-negative organisms, 6 (2.8%) were due to fungi. Staphylococcus was the  
58  
59 275 most common Gram-positive organism in both early-onset and late-onset peritonitis.  
60



1  
2  
3  
4 276 This bacterial flora distribution and high incidence of staphylococcus were similar to  
5  
6 277 previous reports.<sup>18-20</sup> Fungal peritonitis was rare in PD patients, but could bring out  
7  
8 278 irreversible peritoneal damage.<sup>21</sup> Recent clinical studies confirmed that the incidence  
9  
10 279 of fungal peritonitis was only 3%-6%,<sup>21</sup> while the relative mortality rate was up to  
11  
12 280 20%-30%.<sup>22</sup> The culture-negative proportion for the first peritonitis episode was high  
13  
14 281 in the LOP patients (89.2%). And the incidences of culture-negative peritonitis were  
15  
16 282 37.1% (13/35) in Shanghai East Hospital, 71.7% (38/53) in Shanghai Songjiang  
17  
18 283 District Central Hospital, 67.2% (84/125) in Baoshan branch of Shanghai First  
19  
20 284 People's Hospital ( $P=0.002$ ). The high culture-negative proportion may primary  
21  
22 285 attributed to early antibiotic treatment and limited effluent culture technique in  
23  
24 286 small-scale PD units. Before 2014, the technology of blood culture for PD effluent  
25  
26 287 has not been widely adopted by small-scale district hospitals in Shanghai. In the  
27  
28 288 district PD units, dialysate was inoculated onto solid medium and then incubated only  
29  
30 289 in aerobic environment. It accounted for about 60% of culture-negative peritonitis  
31  
32 290 patients in this investigation. Since 2015, all these three units in Shanghai choose  
33  
34 291 blood-culture bottle for the preferred technique to culture microorganism in PD  
35  
36 292 effluent. Lacking centrifugation of PD effluent and recent antibiotic usage may the  
37  
38 293 major reasons for the rest of 40% negative effluent cultures in this investigation.  
39  
40 294 Considering the high culture negative rate in this study, our three PD units will take a  
41  
42 295 series of measures to improve our culture methods, including centrifugation of PD  
43  
44 296 effluent, incubation in aerobic, microaerophilic and anaerobic environments, using  
45  
46 297 antibiotic neutralization bottle and so on.<sup>13 14</sup>

48 298 By the end of the study, 509 episodes of peritonitis occurred in 213 patients, and  
49  
50 299 the peritonitis rate was 0.490 episodes per patient-year. The peritonitis rates in  
51  
52 300 Shanghai East Hospital, Shanghai Songjiang District Central Hospital and Baoshan  
53  
54 301 Branch of Shanghai First People's Hospital were 0.41, 0.31 and 0.61 episodes per  
55  
56 302 patient-year respectively. Recently, some investigations from other areas of China  
57  
58 303 have indicated that the peritonitis rate was 0.196 episodes per patient-year in Taiwan  
59  
60

1  
2  
3  
4 304 <sup>5</sup>, 0.158 episodes per patient-year in Guangzhou,<sup>7</sup> 0.296 episodes per patient-year in  
5  
6 305 Suzhou <sup>16</sup> and 0.158 per patient-year in Hangzhou <sup>8</sup>. Peritonitis rate in our study is  
7  
8 306 higher than the rest of China. Among the early-onset peritonitis patients who had  $\geq 3$   
9  
10 307 episodes of peritonitis, 25 EOP patients underwent recurrent peritonitis, 16 EOP  
11  
12 308 patients underwent repeat peritonitis. 43.8% repeat patients were staphylococcal  
13  
14 309 peritonitis. And 75% EOP patients with  $\geq 3$  episodes of peritonitis came from Baoshan  
15  
16 310 Branch of Shanghai First People's Hospital. Most of these patients are fishermen  
17  
18 311 living in the Chongming Island and have related poorer economic abilities and living  
19  
20 312 conditions. These PD patients are easy to undergo poorer nutritional status and suffer  
21  
22 313 peritonitis again [13, 14]. And lacking of home visit by PD nurses makes it difficult to  
23  
24 314 determine which patients require PD re-training. Lacking of technical improvement in  
25  
26 315 small-scale PD units is also the important reason for high peritonitis rate.

27  
28 316 Our study found that lower serum albumin was one of the major risk factors for  
29  
30 317 early-onset peritonitis. Loss of protein would cause negative nitrogen balance and  
31  
32 318 malnutrition, leading to a decline in immune function and increased susceptibility to  
33  
34 319 pathogenic microorganisms.<sup>23</sup> Malnutrition was one of the most common  
35  
36 320 complications in PD patients, and plasma albumin level was an important clinical  
37  
38 321 predictor. Hypoalbuminemia was proved to be related with malnutrition, protein  
39  
40 322 losses, and inflammation.<sup>24 25</sup> Wang Qin et al. discovered that patients with an initial  
41  
42 323 serum albumin level less than 2.9 g/dL had a higher incidence of peritonitis and  
43  
44 324 regarded hypoalbuminemia as an independent predictor for subsequent peritonitis at  
45  
46 325 the start of PD therapy.<sup>26</sup> Further studies demonstrated that low serum albumin level  
47  
48 326 increased all-cause, cardiovascular, and infection related mortality in both PD and HD  
49  
50 327 patients.<sup>27</sup> In addition to peritoneal infection, hypoalbuminemia was also found to be  
51  
52 328 associated with septicemia, pneumonia and other inflammatory responses.<sup>28-32</sup> In this  
53  
54 329 study, we reaffirmed that a low baseline serum albumin level is an independent risk  
55  
56 330 factors for EOP (OR=0.926, 95%CI 0.868-0.989, P=0.021).

57  
58 331 Although older age is not an independent risk factor for EOP, baseline data  
59  
60

1  
2  
3  
4 332 showed that patients in EOP group older than LOP group ( $65.87 \pm 13.20$  vs.  
5 333  $61.40 \pm 13.53$ ,  $P=0.022$ ). It was reported that elder patients were more likely to  
6  
7 334 progress to a worse outcome, including HD, renal transplantation or death.<sup>33</sup>  
8  
9 335 Incidence of malnutrition in elderly PD patients was more common than young and  
10  
11 336 middle-aged patients. Together with cardiovascular diseases, cerebrovascular disease,  
12  
13 337 hearing and visual impairments, all of these factors increase and aggravate the episode  
14  
15 338 of peritonitis.<sup>34-36</sup> Malnutrition in elder not only affected the quality of dialysis  
16  
17 339 patients' life, but also was an important factor in comorbidity and mortality.<sup>37</sup> Other  
18  
19 340 elements that increased the peritonitis susceptibility in elderly patients included  
20  
21 341 generalized functional deterioration, weakened immune system,<sup>38</sup> combined chronic  
22  
23 342 diseases, bad eyesight, poor aseptic concept, lack of compliance and living alone.  
24  
25 343 Their atypical clinical symptoms of peritonitis could be regarded as another essential  
26  
27 344 reason. Up-regulated pain threshold, unobtrusive bellyache and mild subjective  
28  
29 345 symptoms might cover up early-onset peritonitis until the occurrence of liquid  
30  
31 346 turbidity, which would delay the best time for treatment.

32  
33  
34 347 Comparison in biochemical indicators shown that Kt/V and residual renal  
35  
36 348 function decreased significantly after early-onset peritonitis. Multivariate logistic  
37  
38 349 regression showed that lower eGFR (OR=0.916, 95%CI 0.832-1.009,  $P=0.076$ ) and  
39  
40 350 Kt/V (OR=0.631, 95%CI 0.411-0.969,  $P=0.035$ ) at the start of PD, were associated  
41  
42 351 with EOP. These results suggest that early infection with peritonitis might further  
43  
44 352 worsen renal function, especially the scavenging capacity of solutes by residual  
45  
46 353 kidney. Early inflammatory response and renal function damage might be the  
47  
48 354 underlying causes of peritonitis. Some studies suggested that the survival rate of PD  
49  
50 355 patients depends more on residual renal function than the peritoneal cleaning  
51  
52 356 capacity.<sup>39-41</sup> Harris et al. further put forward that residual renal function less than 4  
53  
54 357  $\text{ml} \cdot \text{min}^{-1} \cdot 1.73\text{m}^{-2}$  was associated with high mortality during peritoneal dialysis.<sup>42</sup>  
55  
56 358 Therefore, we should pay close attention to the change of residual renal function  
57  
58 359 when monitoring the adequacy of dialysis.  
59  
60

1  
2  
3  
4 360 The relationship between peritonitis and technique failure and death have been  
5  
6 361 investigated in previous Chinese single-center studies.<sup>7,8</sup> A study in Chinese Zhejiang  
7  
8 362 province showed that, EOP was a significant predictor of all-cause mortality. As for  
9  
10 363 technique failure, they found no significant differences between EOP and LOP.<sup>8</sup>  
11  
12 364 However, a study in Chinese Guangzhou province indicated that technique failure in  
13  
14 365 EOP group was lower than LOP group, but patient survival did not differ between the  
15  
16 366 two groups.<sup>7</sup> Our present study showed that EOP was the only significant predictor of  
17  
18 367 technique failure (HR=1.801, 95%CI 0.996-3.257, P=0.051). There were no  
19  
20 368 differences between EOP and LOP for all-cause mortality. These conclusions might  
21  
22 369 be limited by regional and demographic differences in different dialysis center.  
23  
24 370 However, all three studies indicated that patients who experienced peritonitis early  
25  
26 371 after the initiation of PD were likely having more episodes of peritonitis. Repeating  
27  
28 372 peritonitis in EOP patients have an obvious impact on membrane permeability,  
29  
30 373 increasing severe systemic inflammation, reducing ultrafiltration and leading to worse  
31  
32 374 clinical outcomes.<sup>43</sup> Thus, appropriately dealing with the risk factors of early-onset  
33  
34 375 peritonitis will be good to reduce infection incidence, raise therapeutic effect of PD,  
35  
36 376 improve patient's life quality and prognosis.

37  
38 377 There are several limitations to this study. First, this was a retrospective cohort  
39  
40 378 study, lacking of some objective information such as education level, economic  
41  
42 379 development and living standard, which may cause bias. Second, although this was a  
43  
44 380 multicenter study, the sample size was relatively small. Further larger size and  
45  
46 381 prospective investigation are necessary.

47  
48 382

## 49 383 **CONCLUSION**

50  
51 384 In summary, this retrospective cohort study found that a higher CCI score and lower  
52  
53 385 serum albumin and Kt/V before PD were significantly associated with EOP. In  
54  
55 386 addition, an early peritonitis onset predicted a high peritonitis rate and worse clinical  
56  
57 387 outcomes. Understanding the risk factors for EOP helps to develop effective measures  
58  
59  
60

388 to prevent or delay the complication of peritoneal dialysis as much as possible.

389

390 **Acknowledgements** The authors appreciate all the participants and their families.

391 They also thank the members of the study team from Shanghai East Hospital

392 Affiliated to Tongji University School of Medicine, Shanghai Songjiang District

393 Central Hospital and Baoshan Branch of Shanghai First People's Hospital for their

394 assistance in completing this project.

395

396 **Author Contributors**

397 X.M., Y.S. M.T. and X.J. contributed equally to this work. X.M., Y.S. M.T. and X.J.

398 performed the statistical analysis and wrote the manuscript; X.M., Y.S., M.T., X.J.,

399 Y.W., D.J., L.F., W.J., L.D. and X.Z. participated in the data collection; X.M., Y.S.,

400 S.Z. and N.L. contributed to discussion; X.M., S.Z. and N.L. participated in the

401 design of the study and edited the manuscript. All authors contributed to data

402 interpretation and revisions of the manuscript critically for important intellectual

403 content. All authors approved the final version of the submitted manuscript and

404 agreed to be accountable for all aspects of the work in ensuring that questions related

405 to the accuracy or integrity of any part of work are appropriately investigated and

406 resolved.

407

408 **Funding**

409 This study was supported by the National Nature Science Foundation of China grants

410 (81670690, 81470991 and 81200492 to N.L., 81270778, 81470920, 81670623 and

411 81830021 to S.Z.), the Key Discipline Construction Project of Pudong Health Bureau

412 of Shanghai (PWZxk2017-05 to N.L.), the Science Technology grant of Jiangxi

413 Province Municipal Health Commission (20184077 to L.F.), the Branch grant of

414 National key grants of Ministry of Science and Technology (2018YFA0108802 to

415 S.Z.), the US National Institutes of Health (2R01DK08506505A1 to S.Z.), the

1  
2  
3  
4 416 Shanghai Scientific Committee of China (13PJ1406900 to N.L.).

5  
6 417 **Competing interests** None declared.

7  
8 418 **Patient consent** Obtained.

9  
10 419 **Ethics approval and consent to participate**

11  
12 420 The study was conducted according to the guidelines of the Helsinki Declaration and  
13  
14 421 was approved by the Human Research Ethics Committee of Shanghai East Hospital  
15  
16 422 Affiliated to Tongji University School of Medicine, Human Research Ethics  
17  
18 423 Committee of Shanghai Songjiang District Central Hospital and the Human Research  
19  
20 424 Ethics Committee of Baoshan Branch of Shanghai First People's Hospital. Written  
21  
22 425 informed consent was obtained from each participant before data collection.

23  
24 426 **Provenance and peer review** Not commissioned; externally peer reviewed.

25  
26  
27 427 **Data availability statement** The data sets generated and analyzed during the  
28  
29 428 current study are available from the corresponding author upon reasonable request.

30  
31  
32 429 **Open Access** This is an Open Access article distributed in accordance with the  
33  
34 430 Creative Commons Attribution Non Commercial (CC BY-NC 4.0) license, which  
35  
36 431 permits others to distribute, remix, adapt, build upon this work non-commercially, and  
37  
38 432 license their derivative works on different terms, provided the original work is  
39  
40 433 properly cited and the use is non-commercial.

41  
42  
43  
44  
45  
46 434 See: <http://creativecommons.org/licenses/by-nc/4.0/>

47  
48  
49 435 © Article author(s) (or their employer(s) unless otherwise stated in the text of the  
50  
51 436 article) 2018. All rights reserved. No commercial use is permitted unless otherwise  
52  
53 437 expressly granted.

54  
55  
56 438

57  
58 439

59  
60 440

441 **REFERENCES**

- 442 1. Li PK, Chow KM, Van de Luijngaarden MW, et al. Changes in the worldwide  
443 epidemiology of peritoneal dialysis. *Nat Rev Nephrol* 2017;13:90-103.
- 444 2. Jain AK, Blake P, Cordy P, et al. Global trends in rates of peritoneal dialysis. *J Am*  
445 *Soc Nephrol* 2012;23:533-44.
- 446 3. Cho Y, Johnson DW. Peritoneal dialysis-related peritonitis: towards improving  
447 evidence, practices, and outcomes. *Am J Kidney Dis* 2014;64:278-89.
- 448 4. Thirugnanasambathan T, Hawley CM, Badve SV, et al. Repeated peritoneal  
449 dialysis-associated peritonitis: a multicenter registry study. *Am J Kidney Dis*  
450 2012;59:84-91.
- 451 5. Hsieh YP, Wang SC, Chang CC, et al. The negative impact of early peritonitis on  
452 continuous ambulatory peritoneal dialysis patients. *Perit Dial Int* 2014;34:627-35.
- 453 6. See EJ, Johnson DW, Hawley CM, et al. Early peritonitis and its outcome in  
454 incident peritoneal dialysis patients *Perit Dial Int* 2017.
- 455 7. Wu H, Huang R, Yi C, et al. Risk factors for early-onset peritonitis in southern  
456 Chinese peritoneal dialysis patients. *Perit Dial Int* 2016;36:640-46.
- 457 8. Tian Y, Xie X, Xiang S, et al. Risk factors and outcomes of early-onset peritonitis  
458 in Chinese peritoneal dialysis patients. *Kidney Blood Press Res* 2017;42:1266-76.
- 459 9. Béchade C, Guittet L, Evans D, et al. Early failure in patients starting peritoneal  
460 dialysis: a competing risks approach. *Nephrol Dial Transplant* 2014;29:2127-35.
- 461 10. Feng S, Wang Y, Qiu B, et al. Impact of early-onset peritonitis on mortality and  
462 technique survival in peritoneal dialysis patients. *Springerplus* 2016;5:1676.
- 463 11. Fourtounas C, Savidaki E, Dousdabanis P, et al. Peritonitis during the first year  
464 after commencement of peritoneal dialysis has an impact on technique survival  
465 and patient morbidity. *Adv Perit Dial* 2006;22:50-4.
- 466 12. Chinese Expert Group on Peritoneal Dialysis Catheterization. Chinese guidelines  
467 for peritoneal dialysis catheterization. *Chinese J Nephrol* 2016;32:867-71.
- 468 13. Li PK, Szeto CC, Piraino B, et al. ISPD peritonitis recommendations: 2016 update  
469 on prevention and treatment. *Perit Dial Int* 2016;36:481-508.

- 1  
2  
3  
4 470 14. Szeto CC, Li PK, Johnson DW, et al. ISPD catheter-related infection  
5  
6 471 recommendations: 2017 Update. *Perit Dial Int* 2017;37:141-54.  
7  
8 472 15. Li PK, Szeto CC, Piraino B, et al. Peritoneal dialysis-related infections  
9  
10 473 recommendations: 2010 update. *Perit Dial Int* 2010;30:393-423.  
11  
12 474 16. Wang Z, Jiang L, Feng S, et al. Early peritonitis is an independent risk factor for  
13  
14 475 mortality in elderly peritoneal dialysis patients. *Kidney Blood Press Res*  
15  
16 476 2015;40:298-305.  
17  
18 477 17. Shen JI, Mitani AA, Saxena AB, et al. Determinants of peritoneal dialysis  
19  
20 478 technique failure in incident US patients. *Perit Dial Int* 2013;33:155-66.  
21  
22 479 18. Hsieh Y, Wang S, Chang C, et al. The negative impact of early peritonitis on  
23  
24 480 continuous ambulatory peritoneal dialysis patients. *Perit Dial Int* 2014;34:627-35.  
25  
26 481 19. Barretti P, Doles J, Pinotti D, et al. Efficacy of antibiotic therapy for peritoneal  
27  
28 482 dialysis-associated peritonitis: a proportional meta-analysis. *BMC Infect Dis*  
29  
30 483 2014;14:445.  
31  
32 484 20. Govindarajulu S, Hawley C, McDonald S, et al. Staphylococcus aureus peritonitis  
33  
34 485 in Australian peritoneal dialysis patients: predictors, treatment, and outcomes in  
35  
36 486 503 cases. *Perit Dial Int* 2010;30:311-9.  
37  
38 487 21. Matuszkiewicz-Rowinska J. Update on fungal peritonitis and its treatment. *Perit*  
39  
40 488 *Dial Int* 2009;29 Suppl 2:S161-5.  
41  
42 489 22. Szeto C, Chow K. Gram-negative peritonitis--the Achilles heel of peritoneal  
43  
44 490 dialysis? *Perit Dial Int* 2007;27 Suppl 2:S267-71.  
45  
46 491 23. Li Z, An X, Mao H, et al. Association between depression and  
47  
48 492 malnutrition-inflammation complex syndrome in patients with continuous  
49  
50 493 ambulatory peritoneal dialysis. *Int Urol Nephrol* 2011;43:875-82.  
51  
52 494 24. Fanali G, di Masi A, Trezza V, et al. Human serum albumin: from bench to  
53  
54 495 bedside. *Mol Aspects Med* 2012;33:209-90.  
55  
56 496 25. Yu Z, Tan B, Dainty S, et al. Hypoalbuminaemia, systemic albumin leak and  
57  
58 497 endothelial dysfunction in peritoneal dialysis patients. *Nephrol Dial Transplant*  
59  
60



- 1  
2  
3  
4 498 2012;27:4437-45.
- 5  
6 499 26. Wang Q, Bernardini J, Piraino B, et al. Albumin at the start of peritoneal dialysis  
7  
8 500 predicts the development of peritonitis. *Am J Kidney Dis* 2003;41:664-9.
- 9  
10 501 27. Mehrotra R, Duong U, Jiwakanon S, et al. Serum albumin as a predictor of  
11  
12 502 mortality in peritoneal dialysis: comparisons with hemodialysis. *Am J Kidney Dis*  
13  
14 503 2011;58:418-28.
- 15  
16 504 28. Seo M, Choa M, You J, et al. Hypoalbuminemia, low base excess values, and  
17  
18 505 tachypnea predict 28-day mortality in severe sepsis and septic shock patients in  
19  
20 506 the emergency department. *Yonsei Med J* 2016;57:1361-9.
- 21  
22 507 29. Mizuno T, Mizokami F, Fukami K, et al. The influence of severe  
23  
24 508 hypoalbuminemia on the half-life of vancomycin in elderly patients with  
25  
26 509 methicillin-resistant *Staphylococcus aureus* hospital-acquired pneumonia. *Clin*  
27  
28 510 *Interv Aging* 2013;8:1323-8.
- 29  
30 511 30. Juneja M, Baidoo L, Schwartz M, et al. Geriatric inflammatory bowel disease:  
31  
32 512 phenotypic presentation, treatment patterns, nutritional status, outcomes, and  
33  
34 513 comorbidity. *Dig Dis Sci* 2012;57:2408-15.
- 35  
36 514 31. Don B, Kaysen G. Serum albumin: relationship to inflammation and nutrition.  
37  
38 515 *Semin Dial* 2004;17:432-7.
- 39  
40 516 32. Magnussen B, Oren Gradel K, Gorm Jensen T, et al. Association between  
41  
42 517 hypoalbuminaemia and mortality in patients with community-acquired  
43  
44 518 bacteraemia is primarily related to acute disorders. *PLoS ONE* 2016;11:e0160466.
- 45  
46 519 33. Maitra S, Burkart J, Fine A, et al. Patients on chronic peritoneal dialysis for ten  
47  
48 520 years or more in North America. *Perit Dial Int* 2000;20 Suppl 2:S127.
- 49  
50 521 34. Sakaci T, Ahabap E, Koc Y, et al. Clinical outcomes and mortality in elderly  
51  
52 522 peritoneal dialysis patients. *Clinics (Sao Paulo)* 2015;70:363-8.
- 53  
54 523 35. Valderrabano F, Jofre R, Lopez-Gomez JM. Quality of life in end-stage renal  
55  
56 524 disease patients. *Am J Kidney Dis* 2001;38:443-64.
- 57  
58 525 36. Joly D, Anglicheau D, Alberti C, et al. Octogenarians reaching end-stage renal  
59  
60

- 1  
2  
3  
4 526 disease: cohort study of decision-making and clinical outcomes. *J Am Soc*  
5  
6 527 *Nephrol* 2003;14:1012-21.
- 7  
8 528 37. Tennankore KK, Bargman JM. Nutrition and the kidney: recommendations for  
9  
10 529 peritoneal dialysis. *Adv Chronic Kidney Dis* 2013;20:190-201.
- 11  
12 530 38. Hsieh YP, Chang CC, Wen YK, et al. Predictors of peritonitis and the impact of  
13  
14 531 peritonitis on clinical outcomes of continuous ambulatory peritoneal dialysis  
15  
16 532 patients in Taiwan—10 years' experience in a single center. *Perit Dial Int*  
17  
18 533 2014;34:85.
- 19  
20 534 39. Szeto C, Kwan B, Chow K, et al. Predictors of residual renal function decline in  
21  
22 535 patients undergoing continuous ambulatory peritoneal dialysis. *Perit Dial Int*  
23  
24 536 2015;35:180-8.
- 25  
26 537 40. Vilar E, Farrington K. Emerging importance of residual renal function in  
27  
28 538 end-stage renal failure. *Semin Dial* 2011;24:487-94.
- 29  
30 539 41. Raimann J, Kitzler T, Levin N. Factors affecting loss of residual renal function(s)  
31  
32 540 in dialysis. *Contrib Nephrol* 2012;178:150-6.
- 33  
34 541 42. Harris S, Lamping D, Brown E, et al. Clinical outcomes and quality of life in  
35  
36 542 elderly patients on peritoneal dialysis versus hemodialysis. *Perit Dial Int*  
37  
38 543 2002;22:463-70.
- 39  
40 544 43. van Diepen AT, van Esch S, Struijk DG, et al. The first peritonitis episode alters  
41  
42 545 the natural course of peritoneal membrane characteristics in peritoneal dialysis  
43  
44 546 patients. *Perit Dial Int* 2015;35:324-32.

547

548

549

550

551

552

553

Table 1. Baseline characteristic of the study population

| Variable                             | Peritonitis-free<br>(N=144) | EOP<br>(N=74)     | LOP<br>(N=139)    | P value between<br>EOP and LOP | P value |
|--------------------------------------|-----------------------------|-------------------|-------------------|--------------------------------|---------|
| Age (years)                          | 63.18±13.91                 | 65.87±13.20       | 61.40±13.53       | 0.022                          | 0.075   |
| Gender (male, n, %)                  | 84 (58.3)                   | 37 (50.0)         | 90 (64.7)         | 0.037                          | 0.135   |
| Smoking (%)                          | 40 (27.8)                   | 22 (29.7)         | 31 (22.3)         | 0.233                          | 0.415   |
| Drinking (%)                         | 31 (21.5)                   | 20 (27.0)         | 32 (23.0)         | 0.517                          | 0.659   |
| Charlson comorbidity index score     | 3.76±1.51                   | 5.73±2.17         | 4.42±1.93         | <0.001                         | <0.001  |
| Body mass index (kg/m <sup>2</sup> ) | 23.55±3.76                  | 24.19±3.31        | 24.32±3.38        | 0.791                          | 0.174   |
| Hemoglobin (g/L)                     | 83.67±17.70                 | 89.10±22.90       | 88.53±19.77       | 0.849                          | 0.059   |
| Serum calcium (mmol/L)               | 1.98±0.29                   | 2.14±0.41         | 2.11±0.33         | 0.514                          | 0.001   |
| Serum phosphorus (mmol/L)            | 1.77±0.55                   | 1.91±0.61         | 1.83±0.78         | 0.457                          | 0.349   |
| Serum potassium (mmol/L)             | 4.39±0.65                   | 4.41±0.74         | 4.39±0.80         | 0.865                          | 0.980   |
| Fasting blood glucose (mmol/L)       | 5.38±2.01                   | 6.49±2.93         | 6.09±2.10         | 0.261                          | 0.001   |
| TC (mmol/L)                          | 4.02 (3.36, 5.11)           | 4.59 (3.54, 6.06) | 4.43 (3.57, 5.70) | 0.537                          | 0.022   |
| TG (mmol/L)                          | 1.28 (0.97, 1.74)           | 1.30 (1.00, 2.39) | 1.24 (1.00, 2.17) | 0.469                          | 0.430   |
| HDL-C (mmol/L)                       | 1.11 (0.85, 1.33)           | 1.18 (0.97, 1.43) | 1.19 (0.98, 1.48) | 0.740                          | 0.042   |
| LDL-C (mmol/L)                       | 2.44 (1.94, 3.11)           | 2.65 (2.01, 3.25) | 2.38 (2.00, 3.09) | 0.238                          | 0.473   |
| Serum albumin (g/L)                  | 33.26±6.26                  | 30.01±7.15        | 33.37±4.92        | <0.001                         | <0.001  |
| Serum uric acid (mmol/L)             | 516.93±142.32               | 495.46±183.30     | 536.48±185.05     | 0.124                          | 0.231   |
| Serum creatinine (µmol/L)            | 659.74±185.48               | 749.77±268.11     | 660.42±302.69     | 0.034                          | 0.027   |
| Blood urea nitrogen (mmol/L)         | 24.49±7.72                  | 25.69±10.73       | 24.51±9.85        | 0.421                          | 0.616   |
| eGFR (ml/min/1.73 m <sup>2</sup> )   | 8.49±3.25                   | 6.84±3.82         | 8.48±4.13         | 0.005                          | 0.003   |
| Total Kt/V                           | 2.31 (1.98, 2.56)           | 2.10 (1.71, 2.54) | 2.33 (1.93, 3.04) | 0.008                          | 0.012   |
| Diabetes mellitus(%)                 | 64 (44.4)                   | 54 (73.0)         | 79 (56.8)         | 0.021                          | <0.001  |
| Hypertension (%)                     | 126 (87.5)                  | 66 (89.2)         | 116 (83.5)        | 0.258                          | 0.439   |
| Dyslipidemia (%)                     | 54 (37.5)                   | 41 (55.4)         | 74 (53.2)         | 0.762                          | 0.009   |
| Cardiovascular disease (%)           | 43 (29.9)                   | 30 (40.5)         | 51 (36.7)         | 0.582                          | 0.241   |
| Cerebrovascular disease (%)          | 21 (14.6)                   | 30 (40.5)         | 55 (39.6)         | 0.890                          | <0.001  |
| Calcium                              | 90 (62.5)                   | 44 (59.5)         | 72 (51.8)         | 0.285                          | 0.179   |
| Iron                                 | 73 (50.7)                   | 41 (55.4)         | 68 (48.9)         | 0.367                          | 0.664   |
| Anti-diabetic medications (%)        | 54 (37.5)                   | 38 (51.4)         | 46 (33.1)         | 0.009                          | 0.031   |
| Anti-hypertension medications (%)    | 124 (86.1)                  | 65 (87.8)         | 112 (80.6)        | 0.178                          | 0.284   |
| Lipid-lowering medications (%)       | 38 (26.4)                   | 36 (48.6)         | 61 (43.9)         | 0.506                          | 0.001   |
| Cause of ESKD                        |                             |                   |                   | 0.182                          | 0.008   |
| Glomerulonephritis (%)               | 57 (39.6)                   | 29 (39.2)         | 68 (48.9)         |                                |         |
| Diabetes (%)                         | 42 (29.2)                   | 34 (45.9)         | 46 (33.1)         |                                |         |
| Other (%)                            | 45 (31.3)                   | 11 (14.9)         | 25 (18.0)         |                                |         |
| Peritonitis episodes (%)             |                             |                   |                   | 0.006                          | 0.006   |
| 1                                    |                             | 17 (23.0)         | 57 (41.0)         |                                |         |
| 2                                    |                             | 16 (21.6)         | 35 (25.2)         |                                |         |
| ≥3                                   |                             | 41 (55.4)         | 47 (33.8)         |                                |         |

EOP, early-onset peritonitis; LOP, late-onset peritonitis; TC, total cholesterol; TG total triglyceride; HDL-C, high-density lipoprotein cholesterol; LDL-C, low-density lipoprotein cholesterol; GFR, glomerular filtration rate; ESKD, end stage kidney disease

554

555

556

557

558 Table 2. Organism and outcome of different vintages of peritonitis (n, %)

| Causative organisms          | Early-onset peritonitis |        | Late-onset peritonitis |        | P value |
|------------------------------|-------------------------|--------|------------------------|--------|---------|
|                              | episodes                | (n)    | episodes               | (n)    |         |
| Causative organisms          |                         |        |                        |        |         |
| Gram-positive organisms      | 38                      | (51.4) | 9                      | (6.5)  | <0.001  |
| Staphylococcus aureus        | 7                       | (18.4) | 0                      | (0.0)  | 0.163   |
| Coagulase-negative           | 3                       | (7.9)  | 0                      | (0.0)  | 0.384   |
| Staphylococcus               | 16                      | (42.1) | 8                      | (88.9) | 0.012   |
| Streptococcus species        | 4                       | (10.5) | 1                      | (11.1) | 0.959   |
| Enterococcus species         | 4                       | (10.5) | 0                      | (0.0)  | 0.309   |
| Other Gram-positives         | 4                       | (10.5) | 0                      | (0.0)  | 0.309   |
| Gram-negative organisms      | 20                      | (27.0) | 4                      | (2.9)  | <0.001  |
| Escherichia coli             | 8                       | (40.0) | 0                      | (0.0)  | 0.121   |
| Klebsiella species           | 6                       | (30.0) | 1                      | (25.0) | 0.841   |
| Acinetobacter species        | 4                       | (20.0) | 1                      | (25.0) | 0.822   |
| Pseudomonas Aeruginosa       | 2                       | (10.0) | 1                      | (25.0) | 0.408   |
| Other Gram-negatives         | 0                       | (0.0)  | 1                      | (25.0) | 0.022   |
| Fungi                        | 4                       | (5.4)  | 2                      | (1.4)  | 0.096   |
| Multiple organisms           | 1                       | (1.4)  | 0                      | (0.0)  | 0.170   |
| Culture-negative peritonitis | 11                      | (14.9) | 124                    | (89.2) | <0.001  |
| Outcomes                     |                         |        |                        |        |         |
| Complete cure                | 13                      | (17.6) | 47                     | (33.8) |         |
| Relapse or recurrence        | 25                      | (33.8) | 45                     | (32.4) |         |
| Transfer to hemodialysis     | 20                      | (27.0) | 27                     | (19.4) |         |
| Death                        | 16                      | (21.6) | 20                     | (14.4) |         |

559

560

561

562

563

564

565

566

567

568

569

570

571

572

573

574

575

576 Table 3. Cox proportional hazards model for technique failure and patient mortality.

| Variable                                | Univariate Cox regression analysis |             |         | Multivariate Cox regression analysis |             |         |
|-----------------------------------------|------------------------------------|-------------|---------|--------------------------------------|-------------|---------|
|                                         | HR                                 | (95%CI)     | P value | HR                                   | (95%CI)     | P value |
| <b>Technique failure</b>                |                                    |             |         |                                      |             |         |
| Time to first peritonitis (EOP vs. LOP) | 1.801                              | 0.996-3.257 | 0.051   | 1.801                                | 0.996-3.257 | 0.051   |
| Age (year)                              | 1.004                              | 0.982-1.026 | 0.742   |                                      |             |         |
| Sex (men vs. women)                     | 1.045                              | 0.578-1.892 | 0.884   |                                      |             |         |
| Smoking (yes vs. no)                    | 1.112                              | 0.583-2.120 | 0.747   |                                      |             |         |
| Drinking (yes vs. no)                   | 0.750                              | 0.371-1.517 | 0.424   |                                      |             |         |
| Charlson comorbidity index score        | 1.103                              | 0.972-1.252 | 0.130   |                                      |             |         |
| Body mass index (kg/m <sup>2</sup> )    | 1.043                              | 0.953-1.140 | 0.361   |                                      |             |         |
| Hemoglobin (g/L)                        | 1.003                              | 0.990-1.016 | 0.655   |                                      |             |         |
| Total cholesterol (mmol/L)              | 0.979                              | 0.784-1.222 | 0.849   |                                      |             |         |
| Total triglyceride (mmol/L)             | 0.936                              | 0.676-1.297 | 0.691   |                                      |             |         |
| Serum albumin (g/L)                     | 0.990                              | 0.941-1.040 | 0.686   |                                      |             |         |
| eGFR (ml/min/1.73 m <sup>2</sup> )      | 1.016                              | 0.947-1.090 | 0.664   |                                      |             |         |
| Total Kt/V                              | 1.008                              | 0.737-1.379 | 0.959   |                                      |             |         |
| Diabetes (yes vs. no)                   | 1.383                              | 0.742-2.579 | 0.307   |                                      |             |         |
| <b>Patient mortality</b>                |                                    |             |         |                                      |             |         |
| Time to first peritonitis (EOP vs. LOP) | 1.968                              | 1.006-3.851 | 0.048   | 1.010                                | 0.391-2.606 | 0.984   |
| Age (year)                              | 1.037                              | 1.014-1.061 | 0.002   | 1.002                                | 0.973-1.031 | 0.917   |
| Sex (men vs. women)                     | 0.862                              | 0.498-1.492 | 0.596   |                                      |             |         |
| Smoking (yes vs. no)                    | 0.755                              | 0.344-1.659 | 0.484   |                                      |             |         |
| Drinking (yes vs. no)                   | 0.489                              | 0.200-1.191 | 0.115   |                                      |             |         |
| Charlson comorbidity index score        | 0.999                              | 0.878-1.138 | 0.990   |                                      |             |         |
| Body mass index (kg/m <sup>2</sup> )    | 0.977                              | 0.872-1.096 | 0.695   |                                      |             |         |
| Hemoglobin (g/L)                        | 0.996                              | 0.981-1.011 | 0.591   |                                      |             |         |
| Total cholesterol (mmol/L)              | 0.835                              | 0.647-1.078 | 0.167   |                                      |             |         |
| Total triglyceride (mmol/L)             | 0.956                              | 0.664-1.378 | 0.810   |                                      |             |         |
| Serum albumin (g/L)                     | 0.949                              | 0.907-0.993 | 0.025   | 0.965                                | 0.897-1.039 | 0.346   |
| eGFR (ml/min/1.73 m <sup>2</sup> )      | 0.935                              | 0.860-1.016 | 0.111   |                                      |             |         |
| Total Kt/V                              | 0.650                              | 0.409-1.033 | 0.069   | 0.683                                | 0.425-1.099 | 0.116   |
| Diabetes (yes vs. no)                   | 1.176                              | 0.672-2.057 | 0.570   |                                      |             |         |

577

578

579

580

581

582

583

584

585

586

Table 4. Logistic regression analysis of factors associated with early-onset peritonitis

| Variable                           | Univariate logistic regression analysis |             |         | Multivariate logistic regression analysis |             |         |
|------------------------------------|-----------------------------------------|-------------|---------|-------------------------------------------|-------------|---------|
|                                    | OR                                      | (95%CI)     | P value | OR                                        | (95%CI)     | P value |
| Sex (men vs. women)                | 0.544                                   | 0.307-0.966 | 0.038   | 0.784                                     | 0.369-1.665 | 0.526   |
| Age (year)                         | 1.026                                   | 1.004-1.049 | 0.023   | 1.016                                     | 0.990-1.042 | 0.243   |
| Charlson comorbidity index score   | 1.355                                   | 1.173-1.566 | <0.001  | 1.318                                     | 1.075-1.615 | 0.008   |
| Diabetes                           | 2.051                                   | 1.111-3.786 | 0.022   | 1.084                                     | 0.451-2.604 | 0.858   |
| Serum albumin (g/L)                | 0.901                                   | 0.853-0.951 | <0.001  | 0.926                                     | 0.868-0.989 | 0.021   |
| eGFR (ml/min/1.73 m <sup>2</sup> ) | 0.888                                   | 0.815-0.967 | 0.006   | 0.916                                     | 0.832-1.009 | 0.076   |
| Kt/V                               | 0.553                                   | 0.370-0.827 | 0.004   | 0.631                                     | 0.411-0.969 | 0.035   |

587

588

589

590

591

592

593

594

595

596

597

598

599

600

601

602

603

604

605

606

607

608

609

610

611

612

613

614

615

616

617

618

1  
2  
3  
4 619 **Figure legends**

5  
6 620 **Fig.1. Technique survival according to EOP and LOP.**

7  
8 621 Death were censored form the technique survival analysis. Log rank test Chi-square

9  
10 622 3.943,  $P=0.047$

11  
12 623

13  
14 624

15  
16 625 **Fig.2. Patient survival according to EOP and LOP.**

17  
18 626 Patients who transferred to HD were censored form the patient survival analysis. Log

19  
20 627 rank test Chi-square 4.060,  $P=0.044$

21  
22 628

23  
24 629

1  
2  
3  
4  
5  
6  
7  
8  
9  
10  
11  
12  
13  
14  
15  
16  
17  
18  
19  
20  
21  
22  
23  
24  
25  
26  
27  
28  
29  
30  
31  
32  
33  
34  
35  
36  
37  
38  
39  
40  
41  
42  
43  
44  
45  
46  
47  
48  
49  
50  
51  
52  
53  
54  
55  
56  
57  
58  
59  
60

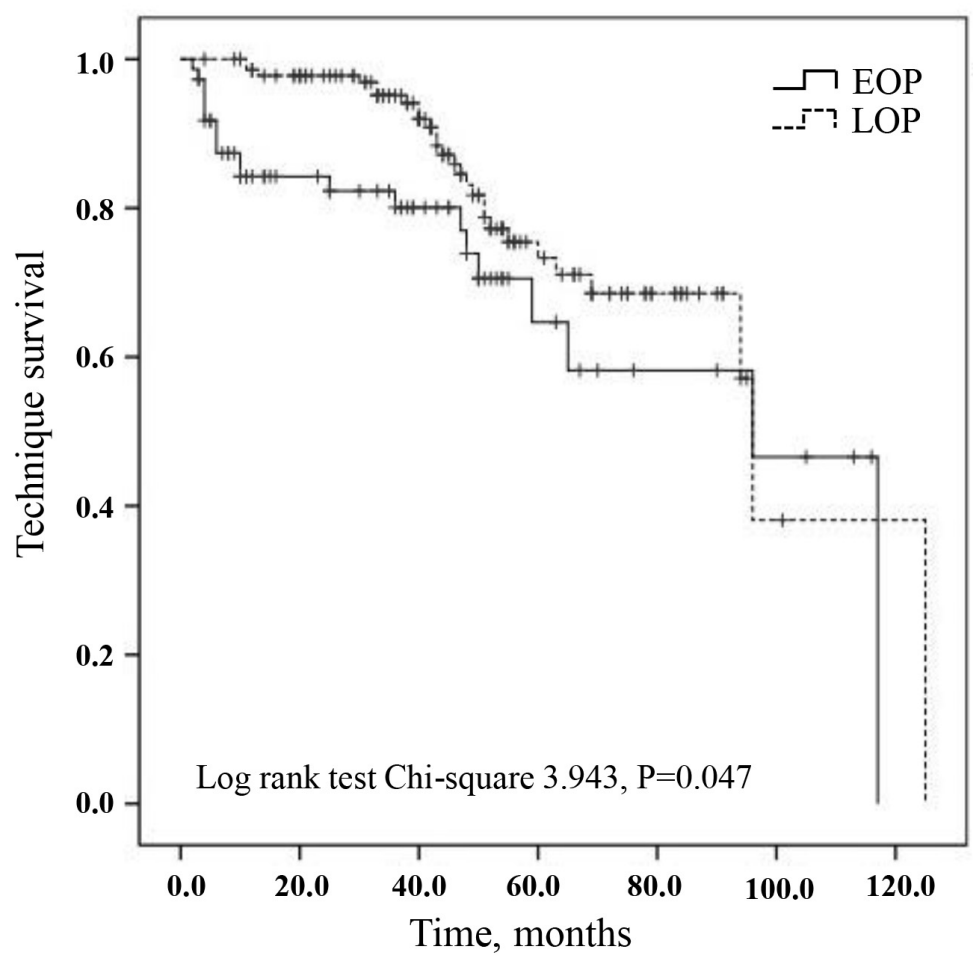

Fig.1. Technique survival according to EOP and LOP. Death were censored form the technique survival analysis. Log rank test Chi-square 3.943, P=0.047

113x111mm (300 x 300 DPI)



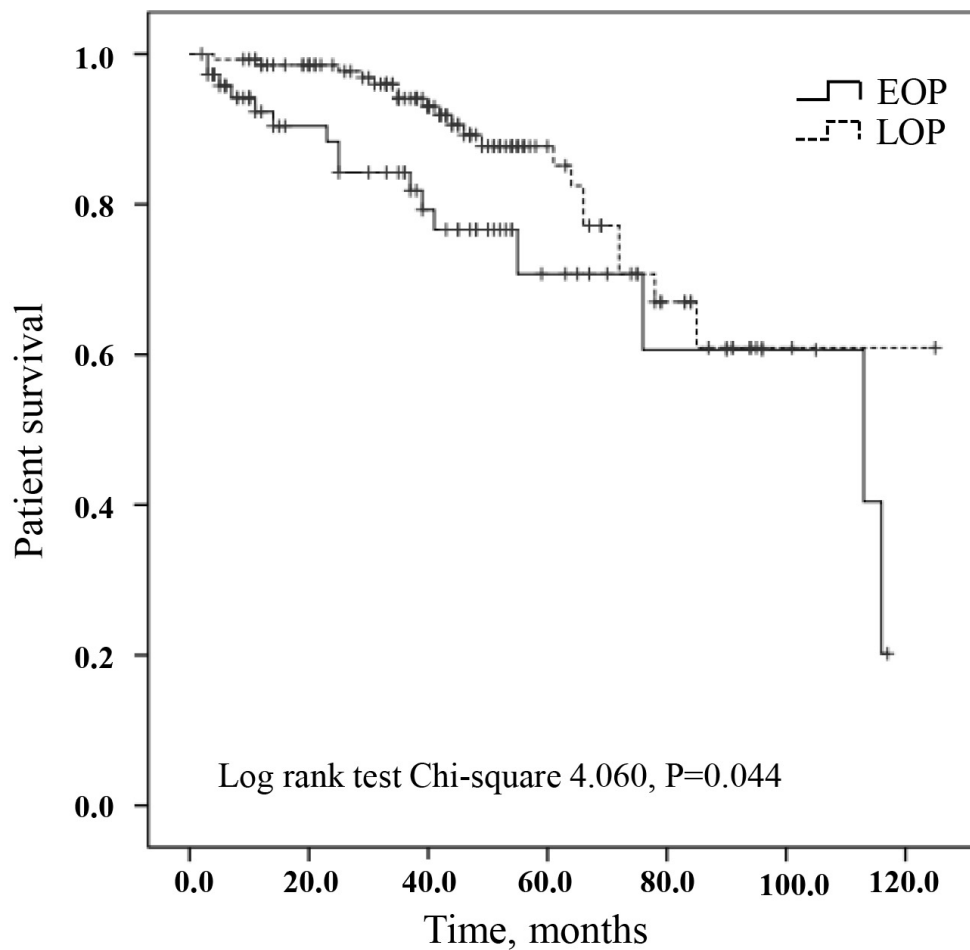

Fig.2. Patient survival according to EOP and LOP. Patients who transferred to HD were censored from the patient survival analysis. Log rank test Chi-square 4.060, P=0.044

111x108mm (300 x 300 DPI)

STROBE 2007 (v4) Statement—Checklist of items that should be included in reports of *cohort studies*

| Section/Topic        | Item # | Recommendation                                                                                                                                                                                                                                                                                                                                                                                                                                                                                                                                                                                                                                                                                                                                                                                                                                                                                                                                                                                                                                                                                                                                                                                                                                                                                                                                                                                                                                                                                                                                                                                                                                                                                                                                                                                                                                                                                                                                                                                                                                                                                                                                                                     | Reported on page # |
|----------------------|--------|------------------------------------------------------------------------------------------------------------------------------------------------------------------------------------------------------------------------------------------------------------------------------------------------------------------------------------------------------------------------------------------------------------------------------------------------------------------------------------------------------------------------------------------------------------------------------------------------------------------------------------------------------------------------------------------------------------------------------------------------------------------------------------------------------------------------------------------------------------------------------------------------------------------------------------------------------------------------------------------------------------------------------------------------------------------------------------------------------------------------------------------------------------------------------------------------------------------------------------------------------------------------------------------------------------------------------------------------------------------------------------------------------------------------------------------------------------------------------------------------------------------------------------------------------------------------------------------------------------------------------------------------------------------------------------------------------------------------------------------------------------------------------------------------------------------------------------------------------------------------------------------------------------------------------------------------------------------------------------------------------------------------------------------------------------------------------------------------------------------------------------------------------------------------------------|--------------------|
| Title and abstract   | 1      | The analysis of risk factors and outcome in peritoneal dialysis patients with early-onset peritonitis: a multi-center, retrospective, cohort study.                                                                                                                                                                                                                                                                                                                                                                                                                                                                                                                                                                                                                                                                                                                                                                                                                                                                                                                                                                                                                                                                                                                                                                                                                                                                                                                                                                                                                                                                                                                                                                                                                                                                                                                                                                                                                                                                                                                                                                                                                                | 1                  |
|                      |        | <p><b>Objectives</b> To investigate the risk factors associated with early-onset peritonitis (EOP) and its influence on patients' technique survival and mortality.</p> <p><b>Study design</b> Retrospective, cohort study.</p> <p><b>Setting</b> Three peritoneal dialysis units in Shanghai.</p> <p><b>Participants</b> PD patients from June 1, 2006, to May 1, 2018, were recruited and followed up until December 31, 2018. According to time-to-first episode of peritonitis, patients were divided into non-peritonitis (n=144), early-onset peritonitis (<math>\leq 6</math> months, n=74) and late-onset peritonitis (LOP) (<math>&gt; 6</math> months, n=139).</p> <p><b>Primary and secondary outcome measures</b> EOP was defined as the first episode of peritonitis occurring within 6 months after the initiation of peritoneal dialysis (PD). The outcomes were all-cause mortality and technique failure.</p> <p><b>Results</b> Of the 357 patients, 74 (20.7%) patients developed their first episode of peritonitis within the first 6 months. Compared with the LOP group, the EOP group had older ages, more female patients, higher Charlson comorbidity index (CCI) score, lower serum albumin levels and renal function at the time of initiation of PD and higher diabetes mellitus and peritonitis rates (<math>P&lt;0.05</math>). Staphylococcus was the most common Gram-positive organism in both EOP and LOP groups. The multivariate logistic regression analysis showed that factors associated with EOP included a higher CCI score (odds ratio (OR) 1.318, <math>P=0.008</math>), lower serum albumin level (OR 0.926, <math>P=0.021</math>) and lower Kt/V (OR 0.631, <math>P=0.035</math>) at start of PD. In the Cox proportional hazards model, EOP was the only predictor of technique failure (hazard ratio (HR) 1.801, <math>P=0.051</math>). There was no difference between EOP and LOP for all-cause mortality.</p> <p><b>Conclusion</b> A higher CCI score and lower serum albumin level and Kt/V at PD initiation were significantly associated with EOP. EOP also predicted a high peritonitis rate and poor clinical outcomes.</p> | 2                  |
| <b>Introduction</b>  |        |                                                                                                                                                                                                                                                                                                                                                                                                                                                                                                                                                                                                                                                                                                                                                                                                                                                                                                                                                                                                                                                                                                                                                                                                                                                                                                                                                                                                                                                                                                                                                                                                                                                                                                                                                                                                                                                                                                                                                                                                                                                                                                                                                                                    |                    |
| Background/rationale | 2      | The definition of early-onset peritonitis varies widely between studies, which generally refers to peritoneal dialysis related peritonitis occurring within 3-24 months after surgical catheterization. <sup>5-8</sup> Previous studies showed that the first episode of peritonitis in PD patients could significantly affect the prognosis of end-stage renal disease (ESRD) patients. <sup>9</sup> However, few studies have specifically examined the risk factors for peritonitis in the early PD period. And most of these were observational cohort studies carried out in single centers, <sup>5 10 11</sup> limiting the generalizability of their observed outcomes. To                                                                                                                                                                                                                                                                                                                                                                                                                                                                                                                                                                                                                                                                                                                                                                                                                                                                                                                                                                                                                                                                                                                                                                                                                                                                                                                                                                                                                                                                                                  | 4                  |

|                              |    |                                                                                                                                                                                                                                                                                                                                                                                                                                                                                                                                                                                                                                                                                                                                         |   |
|------------------------------|----|-----------------------------------------------------------------------------------------------------------------------------------------------------------------------------------------------------------------------------------------------------------------------------------------------------------------------------------------------------------------------------------------------------------------------------------------------------------------------------------------------------------------------------------------------------------------------------------------------------------------------------------------------------------------------------------------------------------------------------------------|---|
|                              |    | determine the risk factors for early-onset peritonitis in Chinese CKD patients and its influence on patients' technique survival and mortality, we conducted this multiple-center, retrospective cohort study.                                                                                                                                                                                                                                                                                                                                                                                                                                                                                                                          |   |
| Objectives                   | 3  | PD patients from June 1, 2006, to May 1, 2018, were recruited and followed up until December 31, 2018. According to time-to-first episode of peritonitis, patients were divided into non-peritonitis (n=144), early-onset peritonitis ( $\leq 6$ months, n=74) and late-onset peritonitis (LOP) ( $> 6$ months, n=139).                                                                                                                                                                                                                                                                                                                                                                                                                 | 4 |
| <b>Methods</b>               |    |                                                                                                                                                                                                                                                                                                                                                                                                                                                                                                                                                                                                                                                                                                                                         |   |
| Study design                 | 4  | Retrospective, cohort study.                                                                                                                                                                                                                                                                                                                                                                                                                                                                                                                                                                                                                                                                                                            | 4 |
| Setting                      | 5  | Three peritoneal dialysis units in Shanghai.                                                                                                                                                                                                                                                                                                                                                                                                                                                                                                                                                                                                                                                                                            | 4 |
| Participants                 | 6  | This was a multi-center retrospective cohort study included 357 patients with ESRD who underwent PD in Department of Nephrology in Baoshan branch of Shanghai First People's Hospital, Shanghai Songjiang District Central Hospital and Shanghai East Hospital, Tongji University School of Medicine. All incident PD patients from June 1, 2006, to May 1, 2018, were recruited and followed up until December 31, 2018. The exclusion criteria were as follows: patients who had been using PD for fewer than 90 days, patients with an age younger than 18 years and patients who initiated PD in other PD centers and previously accepted HD or kidney transplantation.                                                             | 4 |
|                              |    | According to time-to-first episode of peritonitis, patients were divided into non-peritonitis (n=144), early-onset peritonitis ( $\leq 6$ months, n=74) and late-onset peritonitis (LOP) ( $> 6$ months, n=139).                                                                                                                                                                                                                                                                                                                                                                                                                                                                                                                        | 4 |
| Variables                    | 7  | We collected baseline characteristics within 1-3 months from the start of PD, including demographic data (age, gender, smoking, drinking, CCI, BMI), medical history, drug-taking history, biochemical data (hemoglobin, serum electrolyte, fasting blood glucose, total cholesterol, total triglyceride, high-density lipoprotein cholesterol, low-density lipoprotein cholesterol, and serum albumin, uric acid, creatinine, blood urea nitrogen, estimated glomerular filtration rate (eGFR), the clearance rate of urea nitrogen (Kt/V), cause of ESRD, peritonitis episodes. Peritoneal fluid effluent from patients with peritonitis was collected and cultured for 1 to 5 days to identify the bacterial flora in the dialysate. | 6 |
| Data sources/<br>measurement | 8* | Peritoneal fluid effluent from patients with peritonitis was collected and cultured for 1 to 5 days to identify the bacterial flora in the dialysate.                                                                                                                                                                                                                                                                                                                                                                                                                                                                                                                                                                                   | 6 |
| Bias                         | 9  | This was a retrospective cohort study, lacking of some objective information such as education level, economic development and living standard, which may cause bias.                                                                                                                                                                                                                                                                                                                                                                                                                                                                                                                                                                   | 3 |
| Study size                   | 10 | 357 PD patients                                                                                                                                                                                                                                                                                                                                                                                                                                                                                                                                                                                                                                                                                                                         | 4 |
| Quantitative variables       | 11 | The normal distributed data were showed as mean $\pm$ standard deviation (SD) and the skewed data were showed as median values with the 25th to 75th percentile intervals. As for normally distributed data, student's t-test is using for analyzing the differences between the EOP group and LOP group, while one-way ANOVA for differences among in non-peritonitis, EOP group and LOP groups. The Wilcoxon rank sum test for skewed continuous data.                                                                                                                                                                                                                                                                                | 7 |

|                     |     |                                                                                                                                                                                                                                                                                                                                                                                                                                                                                                                                                                                                                                                                                                                                                                                                                                                                                                                                                                                                                                                                                                                                                                                                                                                                                                                                             |      |
|---------------------|-----|---------------------------------------------------------------------------------------------------------------------------------------------------------------------------------------------------------------------------------------------------------------------------------------------------------------------------------------------------------------------------------------------------------------------------------------------------------------------------------------------------------------------------------------------------------------------------------------------------------------------------------------------------------------------------------------------------------------------------------------------------------------------------------------------------------------------------------------------------------------------------------------------------------------------------------------------------------------------------------------------------------------------------------------------------------------------------------------------------------------------------------------------------------------------------------------------------------------------------------------------------------------------------------------------------------------------------------------------|------|
| Statistical methods | 12  | All statistical analyses were performed by SPSS 20.0 for Windows (IBM Corp., Armonk, NY, USA). The normal distributed data were showed as mean±standard deviation (SD) and the skewed data were showed as median values with the 25th to 75th percentile intervals. Categorical data were expressed as frequency (n) and percentage (%). As for normally distributed data, student's t-test is using for analyzing the differences between the EOP group and LOP group, while one-way ANOVA for differences among in non-peritonitis, EOP group and LOP groups. The Wilcoxon rank sum test for skewed continuous data and the Chi-square test or Fisher's exact test for categorical data. The Kaplan-Meier survival curves were drawn for each event of interest (technique survival and patient survival) and the log-rank test was used to compare curves. Univariate Cox proportional hazards regression was used to select significant factors associated with study outcomes. Variables whose $P < 0.10$ were selected for inclusion in the final multivariate Cox model. Multivariate logistic regression was calculated to select significant risk factors for EOP and the inclusion standard was also $P < 0.10$ . Collinearity of variables was tested. A two-tailed $P$ value $< 0.05$ was considered statistically significant. | 7    |
| <b>Results</b>      |     |                                                                                                                                                                                                                                                                                                                                                                                                                                                                                                                                                                                                                                                                                                                                                                                                                                                                                                                                                                                                                                                                                                                                                                                                                                                                                                                                             |      |
| Participants        | 13* | The first episode of peritonitis was experienced by 74 (20.7%) patients within 6 months after the start of PD. 11 (11/61) in Shanghai East Hospital, 22 (22/142) in Shanghai Songjiang District Central Hospital, 41 (41/154) in Baoshan branch of Shanghai First People's Hospital. There are 19 PD patients suffer the peritonitis within the first 3 months, 6 subjects died, 3 patients transferred to hemodialysis, 0 patients underwent renal transplantation, 10 patients continued peritoneal dialysis. While these 10 PD patients lacked of the information of peritoneal equilibration test.                                                                                                                                                                                                                                                                                                                                                                                                                                                                                                                                                                                                                                                                                                                                      | 8    |
| Descriptive data    | 14* | Median follow-up time for the 357 patients was 33.0 months (interquartile range 14.0-50.0 months). There were 211 males (59.1%) with an average age of $61.6 \pm 14.0$ years, and 145 females (40.9%) with an average age of $65.3 \pm 12.9$ years. The most common primary renal diseases were chronic glomerulonephritis (43.1%) and diabetic nephropathy (34.2%). Compared with the LOP patients, the EOP patient group had older ages, more female patients, higher Charlson comorbidity index (CCI) score and lower serum albumin levels, renal function and Kt/V at the time of initiation of PD and higher diabetes mellitus and peritonitis rates ( $P < 0.05$ ).                                                                                                                                                                                                                                                                                                                                                                                                                                                                                                                                                                                                                                                                   | 8    |
| Outcome data        | 15* | Of the 357 patients, 74 (20.7%) patients developed their first episode of peritonitis within the first 6 months. Compared with the LOP group, the EOP group had older ages, more female patients, higher Charlson comorbidity index (CCI) score, lower serum albumin levels and renal function at the time of initiation of PD and higher diabetes mellitus and peritonitis rates ( $P < 0.05$ ). Staphylococcus was the most common Gram-positive organism in both EOP and LOP groups.                                                                                                                                                                                                                                                                                                                                                                                                                                                                                                                                                                                                                                                                                                                                                                                                                                                     | 8-9  |
| Main results        | 16  | The multivariate logistic regression analysis showed that factors associated with EOP included a higher CCI score (odds ratio (OR) 1.318, $P = 0.008$ ), lower serum albumin level (OR 0.926, $P = 0.021$ ) and lower Kt/V (OR 0.631, $P = 0.035$ ) at start of PD. In the Cox proportional hazards model, EOP was the only predictor of technique failure (hazard ratio (HR) 1.801, $P = 0.051$ ). There was no difference between EOP and LOP for all-cause mortality.                                                                                                                                                                                                                                                                                                                                                                                                                                                                                                                                                                                                                                                                                                                                                                                                                                                                    | 9-10 |

|                          |    |                                                                                                                                                                                                                                                                                                                                                                                                                                                                                                                                                                                                                                                                                                                                                                                                                                                                                                         |    |
|--------------------------|----|---------------------------------------------------------------------------------------------------------------------------------------------------------------------------------------------------------------------------------------------------------------------------------------------------------------------------------------------------------------------------------------------------------------------------------------------------------------------------------------------------------------------------------------------------------------------------------------------------------------------------------------------------------------------------------------------------------------------------------------------------------------------------------------------------------------------------------------------------------------------------------------------------------|----|
| Other analyses           | 17 | EOP was defined as the first episode of peritonitis occurring within 3 months. After univariate and multivariate Cox analysis for technique failure and patient mortality, EOP was significantly associated with mortality compared with the LOP group, with a hazard ratio (HR) of 5.131 (Supplemental table1, $P < 0.001$ ). Kaplan-Meier analysis showed that compared with LOP group, patient survival (Log rank 11.211, $P = 0.001$ , Supplemental Fig.2) was lower in the EOP group. As for technique survival, there was no significant difference between EOP and LOP group (Log rank 0.179, $P = 0.672$ , Supplemental Fig.1). We constructed the univariate and multiple logistic regression model using variables including gender, age, CCI score, diabetes, serum albumin, eGFR. We found that lower eGFR at the start of PD is an independent risk factor for EOP (Supplemental table 2). |    |
| <b>Discussion</b>        |    |                                                                                                                                                                                                                                                                                                                                                                                                                                                                                                                                                                                                                                                                                                                                                                                                                                                                                                         |    |
| Key results              | 18 | A higher CCI score and lower serum albumin level and Kt/V at PD initiation were significantly associated with EOP. EOP also predicted a high peritonitis rate and poor clinical outcomes.                                                                                                                                                                                                                                                                                                                                                                                                                                                                                                                                                                                                                                                                                                               | 10 |
| <b>Limitations</b>       |    |                                                                                                                                                                                                                                                                                                                                                                                                                                                                                                                                                                                                                                                                                                                                                                                                                                                                                                         |    |
| Interpretation           | 20 | This was a retrospective cohort study, lacking of some objective information such as education level, economic development and living standard, which may cause bias. Second, although this was a multicenter study, the sample size was relatively small. Further larger size and prospective investigation are necessary.                                                                                                                                                                                                                                                                                                                                                                                                                                                                                                                                                                             | 14 |
| Generalisability         | 21 | There is a strict exclusion criteria based on PD histories. We conducted a multi-center study which ensured sufficient power in obtaining the risk factors of EOP.                                                                                                                                                                                                                                                                                                                                                                                                                                                                                                                                                                                                                                                                                                                                      | 14 |
| <b>Other information</b> |    |                                                                                                                                                                                                                                                                                                                                                                                                                                                                                                                                                                                                                                                                                                                                                                                                                                                                                                         |    |
| Funding                  | 22 | This study was supported by the National Nature Science Foundation of China grants (81670690, 81470991 and 81200492 to N.L., 81270778, 81470920, 81670623 and 81830021 to S.Z.), the Key Discipline Construction Project of Pudong Health Bureau of Shanghai (PWZxk2017-05 to N.L.), the Science Technology grant of Jiangxi Province Municipal Health Commission (20184077 to L.F.), the Branch grant of National key grants of <a href="#">Ministry of Science and Technology</a> (2018YFA0108802 to S.Z.), the US National Institutes of Health (2R01DK08506505A1 to S.Z.), the Shanghai Scientific Committee of China (13PJ1406900 to N.L.).                                                                                                                                                                                                                                                        | 15 |

\*Give information separately for cases and controls in case-control studies and, if applicable, for exposed and unexposed groups in cohort and cross-sectional studies.

**Note:** An Explanation and Elaboration article discusses each checklist item and gives methodological background and published examples of transparent reporting. The STROBE checklist is best used in conjunction with this article (freely available on the Web sites of PLoS Medicine at <http://www.plosmedicine.org/>, Annals of Internal Medicine at <http://www.annals.org/>, and Epidemiology at <http://www.epidem.com/>). Information on the STROBE Initiative is available at [www.strobe-statement.org](http://www.strobe-statement.org).

# BMJ Open

**The analysis of risk factors and outcome in peritoneal dialysis patients with early-onset peritonitis: a multi-center, retrospective, cohort study.**

|                                 |                                                                                                                                                                                                                                                                                                                                                                                                                                                                                                                                                                                                                                                                                                                                                                                                                                                                                                                                  |
|---------------------------------|----------------------------------------------------------------------------------------------------------------------------------------------------------------------------------------------------------------------------------------------------------------------------------------------------------------------------------------------------------------------------------------------------------------------------------------------------------------------------------------------------------------------------------------------------------------------------------------------------------------------------------------------------------------------------------------------------------------------------------------------------------------------------------------------------------------------------------------------------------------------------------------------------------------------------------|
| Journal:                        | <i>BMJ Open</i>                                                                                                                                                                                                                                                                                                                                                                                                                                                                                                                                                                                                                                                                                                                                                                                                                                                                                                                  |
| Manuscript ID                   | bmjopen-2019-029949.R2                                                                                                                                                                                                                                                                                                                                                                                                                                                                                                                                                                                                                                                                                                                                                                                                                                                                                                           |
| Article Type:                   | Original research                                                                                                                                                                                                                                                                                                                                                                                                                                                                                                                                                                                                                                                                                                                                                                                                                                                                                                                |
| Date Submitted by the Author:   | 27-Aug-2019                                                                                                                                                                                                                                                                                                                                                                                                                                                                                                                                                                                                                                                                                                                                                                                                                                                                                                                      |
| Complete List of Authors:       | Ma, Xiaoyan; Shanghai East Hospital, Department of Nephrology<br>Shi, Yingfeng; Shanghai East Hospital, Department of Nephrology<br>Tao, Min; Shanghai East Hospital, Department of Nephrology<br>Jiang, Xiaolu; Shanghai East Hospital, Department of Nephrology<br>Wang, Yi; Shanghai East Hospital, Department of Nephrology<br>Zang, Xiujuan; Department of Nephrology, Shanghai Songjiang District Central Hospital<br>Fang, Lu; Shanghai East Hospital, Department of Nephrology<br>Jiang, Wei; Shanghai East Hospital, Department of Nephrology<br>Du, Lin; Shanghai East Hospital, Department of Nephrology<br>Jin, Dewei; Shanghai East Hospital, Department of Nephrology<br>Zhuang, Shougang; Shanghai East Hospital, Department of Nephrology;<br>Rhode Island Hospital, Department of Medicine<br>Liu, Na; Department of Nephrology, Shanghai East Hospital, Tongji University School of Medicine, Shanghai, China, |
| <b>Primary Subject Heading</b>: | Renal medicine                                                                                                                                                                                                                                                                                                                                                                                                                                                                                                                                                                                                                                                                                                                                                                                                                                                                                                                   |
| Secondary Subject Heading:      | Patient-centred medicine                                                                                                                                                                                                                                                                                                                                                                                                                                                                                                                                                                                                                                                                                                                                                                                                                                                                                                         |
| Keywords:                       | Peritoneal dialysis, Early-onset peritonitis, Risk factors, Outcomes                                                                                                                                                                                                                                                                                                                                                                                                                                                                                                                                                                                                                                                                                                                                                                                                                                                             |
|                                 |                                                                                                                                                                                                                                                                                                                                                                                                                                                                                                                                                                                                                                                                                                                                                                                                                                                                                                                                  |

SCHOLARONE™  
Manuscripts

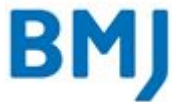

I, the Submitting Author has the right to grant and does grant on behalf of all authors of the Work (as defined in the below author licence), an exclusive licence and/or a non-exclusive licence for contributions from authors who are: i) UK Crown employees; ii) where BMJ has agreed a CC-BY licence shall apply, and/or iii) in accordance with the terms applicable for US Federal Government officers or employees acting as part of their official duties; on a worldwide, perpetual, irrevocable, royalty-free basis to BMJ Publishing Group Ltd ("BMJ") its licensees and where the relevant Journal is co-owned by BMJ to the co-owners of the Journal, to publish the Work in this journal and any other BMJ products and to exploit all rights, as set out in our [licence](#).

The Submitting Author accepts and understands that any supply made under these terms is made by BMJ to the Submitting Author unless you are acting as an employee on behalf of your employer or a postgraduate student of an affiliated institution which is paying any applicable article publishing charge ("APC") for Open Access articles. Where the Submitting Author wishes to make the Work available on an Open Access basis (and intends to pay the relevant APC), the terms of reuse of such Open Access shall be governed by a Creative Commons licence – details of these licences and which [Creative Commons](#) licence will apply to this Work are set out in our licence referred to above.

Other than as permitted in any relevant BMJ Author's Self Archiving Policies, I confirm this Work has not been accepted for publication elsewhere, is not being considered for publication elsewhere and does not duplicate material already published. I confirm all authors consent to publication of this Work and authorise the granting of this licence.

1  
2  
3  
4 1 **The analysis of risk factors and outcome in peritoneal dialysis patients with**  
5  
6 2 **early-onset peritonitis: a multi-center, retrospective, cohort study.**

7  
8 3 Xiaoyan Ma<sup>1\*</sup>, Yingfeng Shi<sup>1\*</sup>, Min Tao<sup>1\*</sup>, Xiaolu Jiang<sup>1\*</sup>, Yi Wang<sup>1</sup>, Xiujuan Zang<sup>2</sup>,  
9  
10 4 Lu Fang<sup>1</sup>, Wei Jiang<sup>1</sup>, Lin Du<sup>1</sup>, Dewei Jin<sup>1</sup>, Shougang Zhuang<sup>1,3</sup>, Na Liu<sup>1</sup>

11  
12 5  
13  
14 6  
15  
16 7 <sup>1</sup>Department of Nephrology, Shanghai East Hospital, Tongji University School of  
17  
18 8 Medicine, Shanghai, China; <sup>2</sup>Department of Nephrology, Shanghai Songjiang District  
19  
20 9 Central Hospital, Shanghai, China; <sup>3</sup>Department of Medicine, Rhode Island Hospital  
21  
22 10 and Brown University School of Medicine, Providence, RI, USA

23  
24 11  
25  
26 12 \*These authors make an equal contribution to this study.

27  
28 13  
29  
30 14 **Corresponding author: Na Liu**, M.D., Ph.D., Department of Nephrology, Shanghai  
31  
32 15 East Hospital, Tongji University School of Medicine, 150 Jimo road, Pudong new  
33  
34 16 district, Shanghai 200120, China. **E-mail:** naliubrown@163.com.



1  
2  
3  
4 29 **ABSTRACT**

5 30 **Objectives** To investigate the risk factors associated with early-onset peritonitis  
6  
7 31 (EOP) and its influence on patients' technique survival and mortality.

8  
9 32 **Study design** Retrospective, cohort study.

10  
11 33 **Setting** Three peritoneal dialysis units in Shanghai.

12  
13 34 **Participants** PD patients from June 1, 2006, to May 1, 2018, were recruited and  
14  
15 35 followed up until December 31, 2018. According to time-to-first episode of  
16  
17 36 peritonitis, patients were divided into non-peritonitis (n=144), early-onset peritonitis  
18  
19 37 ( $\leq 6$  months, n=74) and late-onset peritonitis (LOP) ( $> 6$  months, n=139).

20  
21 38 **Primary and secondary outcome measures** EOP was defined as the first episode of  
22  
23 39 peritonitis occurring within 6 months after the initiation of peritoneal dialysis (PD).  
24  
25 40 The outcomes were all-cause mortality and technique failure.

26  
27 41 **Results** Of the 357 patients, 74 (20.7%) patients developed their first episode of  
28  
29 42 peritonitis within the first 6 months. Compared with the LOP group, the EOP group  
30  
31 43 had older ages, more female patients, higher Charlson comorbidity index (CCI) score,  
32  
33 44 lower serum albumin levels and renal function at the time of initiation of PD and  
34  
35 45 higher diabetes mellitus and peritonitis rates ( $P<0.05$ ). Staphylococcus was the most  
36  
37 46 common Gram-positive organism in both EOP and LOP groups. The multivariate  
38  
39 47 logistic regression analysis showed that factors associated with EOP included a higher  
40  
41 48 CCI score (odds ratio (OR) 1.285,  $P=0.011$ ), lower serum albumin level (OR 0.924,  
42  
43 49  $P=0.016$ ) and lower Kt/V (OR 0.600,  $P=0.018$ ) at start of PD. In the Cox proportional  
44  
45 50 hazards model, EOP was more likely a predictor of technique failure (hazard ratio  
46  
47 51 (HR) 1.801,  $P=0.051$ ). There was no difference between EOP and LOP for all-cause  
48  
49 52 mortality.

50  
51 53 **Conclusion** A higher CCI score and lower serum albumin level and Kt/V at PD  
52  
53 54 initiation were significantly associated with EOP. EOP also predicted a high  
54  
55 55 peritonitis rate and poor clinical outcomes.

56  
57 56  
58  
59  
60

1  
2  
3  
4 57 **KEY WORDS** Peritoneal dialysis; Early-onset peritonitis; Risk factors; Outcomes.  
5  
6

7  
8  
9  
10 58

## 11 59 **ARTICLE SUMMARY**

### 12 60 **Strengths and limitations of this study**

- 13 61 1. There is a strict exclusion criteria based on PD histories.
- 14  
15 62 2. We conducted a multi-center study which ensured sufficient power in obtaining  
16  
17  
18 63 the risk factors of EOP.
- 19  
20  
21 64 3. This was a retrospective cohort study, lacking of some objective information such  
22  
23  
24 65 as education level, economic development and living standard, which may cause  
25  
26  
27 66 bias.
- 28  
29 67 4. Our study lacked of the adjustment of different center factors (education,  
30  
31  
32 68 re-training and home visit) in the multivariate analysis.
- 33  
34  
35 69 5. Although this was a multicenter study, the sample size was relatively small.  
36

37 70

### 38 39 71 **INTRODUCTION**

40  
41 72 In developing countries, the number of peritoneal dialysis (PD) patients has been  
42  
43 73 increasing over time.<sup>1 2</sup> Peritoneal dialysis (PD)-related peritonitis is a serious  
44  
45 74 complication during PD therapy and remains the major reason for technique failure.<sup>3</sup>  
46  
47 75 Severe and prolonged peritonitis leads to structural and functional alterations of the  
48  
49 76 peritoneal membrane, eventually leading to peritoneal fibrosis.<sup>4</sup> Therefore, finding the  
50  
51 77 risk factors for peritonitis in the early stage of PD would help to reduce technique  
52  
53 78 failures and mortality of PD.

54  
55 79 The definition of early-onset peritonitis varies widely between studies, which  
56  
57 80 generally refers to peritoneal dialysis related peritonitis occurring within 3-24 months  
58  
59 81 after surgical catheterization.<sup>5-8</sup> Previous studies showed that the first episode of

1  
2  
3  
4 82 peritonitis in PD patients could significantly affect the prognosis of end-stage renal  
5  
6 83 disease (ESRD) patients.<sup>9</sup> However, few studies have specifically examined the risk  
7  
8 84 factors for peritonitis in the early PD period. And most of these were observational  
9  
10 85 cohort studies carried out in single centers,<sup>5 10 11</sup> limiting the generalizability of their  
11  
12 86 observed outcomes. To determine the risk factors for early-onset peritonitis in  
13  
14 87 Chinese CKD patients and its influence on patients' technique survival and mortality,  
15  
16 88 we conducted this multiple-center, retrospective cohort study.

17 89

## 19 90 **METHODS**

### 21 91 **Study Population**

22  
23 92 This was a multi-center retrospective cohort study included 357 patients with ESRD  
24  
25 93 who underwent PD in Department of Nephrology in Baoshan branch of Shanghai  
26  
27 94 First People's Hospital, Shanghai Songjiang District Central Hospital and Shanghai  
28  
29 95 East Hospital, Tongji University School of Medicine. All incident PD patients from  
30  
31 96 June 1, 2006, to May 1, 2018, were recruited and followed up until December 31,  
32  
33 97 2018. This study was conducted according to the guidelines of the Helsinki  
34  
35 98 Declaration. The human research ethics committees approved this study and agreed to  
36  
37 99 collect the information from the hospital databases. They waived the need for  
38  
39 100 participant consent (The human research ethics committees included the Human  
40  
41 101 Research Ethics Committee of Shanghai East Hospital Affiliated to Tongji University  
42  
43 102 School of Medicine, Human Research Ethics Committee of Shanghai Songjiang  
44  
45 103 District Central Hospital and the Human Research Ethics Committee of Baoshan  
46  
47 104 Branch of Shanghai First People's Hospital). The exclusion criteria were as follows:  
48  
49 105 patients who had been using PD for fewer than 90 days, patients with an age younger  
50  
51 106 than 18 years and patients who initiated PD in other PD centers and previously  
52  
53 107 accepted HD or kidney transplantation. There are 19 PD patients suffer the peritonitis  
54  
55 108 within the first 3 months, 6 subjects died, 3 patients transferred to hemodialysis, 0  
56  
57 109 patients underwent renal transplantation, 10 patients continued peritoneal dialysis.  
58  
59 110 While these 10 PD patients lacked of the information of peritoneal equilibration test.

1  
2  
3  
4 111 Patients were followed until any of the following events: death, a change to HD, renal  
5  
6 112 transplantation or until December 31, 2018. According to the Chinese Peritoneal  
7  
8 113 Dialysis Guideline, we adopted standardized surgical catheterization technique.<sup>12</sup> We  
9  
10 114 chose Tenckhoff silicone tube with double polyester sleeve. Double-purse string  
11  
12 115 suture or double-layer suture was adopted to fix the catheter. Fine needle and thick  
13  
14 116 line were used to prevent peripheral tube leakage. The exit direction of catheter tunnel  
15  
16 117 was downward and outward, and the outer polyester sleeve was 2 to 3 cm away from  
17  
18 118 the exit. All the surgical operations are performed in the operating room. The single  
19  
20 119 dose intravenous antibiotic 30 minutes before surgery is recommended to prevent  
21  
22 120 infection.<sup>13</sup> The first or second generation cephalosporin is suggested.<sup>13 14</sup> According  
23  
24 121 to the ISPD peritonitis recommendations,<sup>13-15</sup> we daily topical application of  
25  
26 122 mupirocin ointment to the catheter exit site to prevent exit site infection. Patients  
27  
28 123 initiated PD by Dianeal with 1.5% or 2.5% dextrose (Baxter Healthcare, Guangzhou,  
29  
30 124 China). Dialysate concentration was 1.5% dextrose and replaced every four hours  
31  
32 125 during the day, while 2.5% at night and kept in the body. A total of 213 patients who  
33  
34 126 had at least one episode of peritonitis. According to time-to-first episode of  
35  
36 127 peritonitis, patients were divided into non-peritonitis (n=144), early-onset peritonitis  
37  
38 128 ( $\leq 6$  months, n=74) and late-onset peritonitis ( $> 6$  months, n=139). We collected  
39  
40 129 baseline characteristics within 1-3 months from the start of PD, including  
41  
42 130 demographic data (age, gender, smoking, drinking, CCI, BMI), medical history,  
43  
44 131 drug-taking history, biochemical data (hemoglobin, serum electrolyte, fasting blood  
45  
46 132 glucose, total cholesterol, total triglyceride, high-density lipoprotein cholesterol,  
47  
48 133 low-density lipoprotein cholesterol, and serum albumin, uric acid, creatinine, blood  
49  
50 134 urea nitrogen, estimated glomerular filtration rate (eGFR), the clearance rate of urea  
51  
52 135 nitrogen (Kt/V), cause of ESRD, peritonitis episodes. Peritoneal fluid effluent from  
53  
54 136 patients with peritonitis was collected and cultured for 1 to 5 days to identify the  
55  
56 137 bacterial flora in the dialysate.  
57  
58  
59 138  
60

### 139 **Primary and secondary outcome measures**

140 Early-onset peritonitis was defined as the first episode of peritonitis occurring within  
141 6 months after the initiation of peritoneal dialysis (PD). This definition is consistent  
142 with other published article.<sup>8 16</sup> The outcomes were all-cause mortality and technique  
143 failure.

### 145 **Study definitions**

146 Diagnostic criteria for peritonitis based on the 2010 International Society for  
147 Peritoneal Dialysis (ISPD) guidelines.<sup>15</sup> Patients diagnosed as peritonitis should meet  
148 at least two of the following three standards: (1) Clinical symptoms or signs of  
149 peritonitis; (2) Leucocyte count (at least 100/mm<sup>3</sup>) and polymorphonuclear  
150 neutrophilic cells proportion (at least 50%) in peritoneal fluid effluent; (3) Related  
151 pathogens in smear or culture of peritoneal fluid. Early-onset peritonitis was defined  
152 as the first episode of peritonitis occurring within 6 months after the initiation of PD.  
153 The outcomes were all-cause mortality and technique failure. Death was an end-point  
154 event in the patient survival analysis. Relapse was defined as an episode occurring  
155 within 4 weeks of completion of therapy of a prior episode with the same organism,<sup>13</sup>  
156 recurrence referred to an episode occurring within 4 weeks of completion of therapy  
157 of a prior episode but with a different organism.<sup>13</sup> Instead of transfer to HD therapy  
158 permanently, both relapse and recurrence were treated by antibiotics and continued  
159 PD treatment. Complete cure was defined as the resolution of peritonitis without  
160 relapse or recurrence by antibiotics alone.<sup>7</sup> However, some of refractory peritonitis  
161 failed to clear up effluent after 5 days of appropriate antibiotics and transferred to HD  
162 permanently. We classified this part of patients into “transfer to hemodialysis”. Other  
163 parts of HD patients were due to the serious tunnel infection with peritonitis and  
164 ultrafiltration failure induced by encapsulating peritoneal sclerosis. Patients who  
165 transferred to HD were censored form the patient survival analysis, and death was  
166 censored for technique failure. Technique failure was defined as the transfer to HD

1  
2  
3  
4 167 therapy permanently (lasted for 30 days or more) due to ultrafiltration failure,  
5 168 peritonitis, exit-site infection and other operational problems.<sup>17</sup>  
6  
7

8 169

## 9 170 **Patient and public involvement**

10  
11 171 No patient was involved in the design or conduct of the study, but the results of the  
12  
13 172 study will be shared to patients coming for follow-up.  
14  
15

16 173

## 17 174 **Statistical analysis**

18  
19  
20 175 All statistical analyses were performed by SPSS 20.0 for Windows (IBM Corp.,  
21  
22 176 Armonk, NY, USA). The normal distributed data were showed as mean±standard  
23  
24 177 deviation (SD) and the skewed data were showed as median values with the 25th to  
25  
26 178 75th percentile intervals. Categorical data were expressed as frequency (n) and  
27  
28 179 percentage (%). As for normally distributed data, student's t-test is using for  
29  
30 180 analyzing the differences between the EOP group and LOP group, while one-way  
31  
32 181 ANOVA for differences among in non-peritonitis, EOP group and LOP groups. The  
33  
34 182 Wilcoxon rank sum test for skewed continuous data and the Chi-square test or  
35  
36 183 Fisher's exact test for categorical data. The Kaplan-Meier survival curves were drawn  
37  
38 184 for each event of interest (technique survival and patient survival) and the log-rank  
39  
40 185 test was used to compare curves. Univariate Cox proportional hazards regression was  
41  
42 186 used to select significant factors associated with study outcomes. Variables whose  
43  
44 187  $P < 0.10$  were selected for inclusion in the final multivariate Cox model. Multivariate  
45  
46 188 logistic regression was calculated to select significant risk factors for EOP and the  
47  
48 189 inclusion standard was also  $P < 0.10$ . Collinearity of variables was tested. A two-tailed  
49  
50 190  $P$  value  $< 0.05$  was considered statistically significant.  
51

52 191

## 53 192 **RESULTS**

### 54 193 **Patient Characteristics**

55  
56  
57  
58 194 A total of 357 patients with ESRD underwent CAPD in three dialysis centers in  
59  
60

1  
2  
3  
4 195 Shanghai during the study period. All patients used Dianeal with 1.5% or 2.5%  
5  
6 196 dextrose. The first episode of peritonitis was experienced by 74 (20.7%) patients  
7  
8 197 within 6 months after the start of PD. 11 (11/61) in Shanghai East Hospital, 22  
9  
10 198 (22/142) in Shanghai Songjiang District Central Hospital, 41 (41/154) in Baoshan  
11  
12 199 branch of Shanghai First People's Hospital. Median follow-up time for the 357  
13  
14 200 patients was 33.0 months (interquartile range 14.0-50.0 months). There were 211  
15  
16 201 males (59.1%) with an average age of  $61.6 \pm 14.0$  years, and 145 females (40.9%)  
17  
18 202 with an average age of  $65.3 \pm 12.9$  years. The most common primary renal diseases  
19  
20 203 were chronic glomerulonephritis (43.1%) and diabetic nephropathy (34.2%).  
21  
22 204 Compared with the LOP patients, the EOP patient group had older ages, more female  
23  
24 205 patients, higher Charlson comorbidity index (CCI) score and lower serum albumin  
25  
26 206 levels, renal function and Kt/V at the time of initiation of PD and higher diabetes  
27  
28 207 mellitus ( $P < 0.05$ ). The percentage of patients experienced more than 3 peritonitis  
29  
30 208 episodes in EOP group (55.4%) is higher than LOP group (33.8%). Additional  
31  
32 209 demographic and laboratory characteristics of the study population are present in  
33  
34 210 Table 1.

211

### 212 **Causative organisms**

213 In table 2, among 213 patients with peritonitis, 47 (22.1%) were due to Gram-positive  
214 organisms, 24 (11.3%) were due to Gram-negative organisms, 6 (2.8%) were due to  
215 fungi, 1 (0.4%) were due to multiple organisms, and 135 (63.4%) were  
216 culture-negative. Staphylococcus was the most common Gram-positive organism in  
217 both groups. Compared with the EOP patient group, the LOP patient group had more  
218 culture-negative peritonitis (89.2% vs. 14.9%,  $P < 0.001$ ). The incidences of  
219 culture-negative peritonitis were 37.1% (13/35) in Shanghai East Hospital, 71.7%  
220 (38/53) in Shanghai Songjiang District Central Hospital, 67.2% (84/125) in Baoshan  
221 branch of Shanghai First People's Hospital ( $P = 0.002$ ).

222

## 223 **Outcomes**

224 The total peritonitis rate was 0.490 episodes per patient-year (213 patients presented  
225 509 episodes of peritonitis during 1039.58 patient-years of follow-up). The peritonitis  
226 rate in EOP group was 0.960 episodes per patient-year (74 patients presented 209  
227 episodes of peritonitis during 217.75 patient-years of follow-up). The peritonitis rate  
228 in LOP group was 0.542 episodes per patient-year (139 patients presented 300  
229 episodes of peritonitis during 553.58 patient-years of follow-up). The peritonitis rates  
230 in Shanghai East Hospital , Shanghai Songjiang District Central Hospital and  
231 Baoshan Branch of Shanghai First People's Hospital were 0.41, 0.31 and 0.61  
232 episodes per patient-year respectively. Early-onset first episode of peritonitis had a  
233 lower cure rate (17.6% vs 33.8%, Table 2.), higher rate of transferring to  
234 hemodialysis (27.0% vs 19.4%, Table 2.), and higher mortality (21.6% vs 14.4%,  
235 Table 2.) compared to late-onset first episode of peritonitis.

## 237 **Technique failure**

238 The variables including time to first peritonitis (EOP vs. LOP), age, sex, smoking,  
239 drinking, CCI, BMI, hemoglobin, total cholesterol, total triglyceride, serum albumin,  
240 total Kt/V and diabetes were calculated into the cox proportional hazards model for  
241 technique failure. And we found that EOP was associated with technique failure  
242 compared with the LOP group, with a hazard ratio (HR) of 1.801 (Table 3,  $P=0.051$ ).  
243 Kaplan-Meier analysis showed that compared with LOP group, technique survival  
244 was lower in the EOP group (Log rank 3.943,  $P=0.047$ , Fig.1).

## 246 **All-cause mortality**

247 During the study period, a total of 52 patients died: 16 patients in the EOP group and  
248 20 patients in the LOP group. Variables with  $P$  value  $< 0.10$  in univariate Cox  
249 regression analysis, including the time to first peritonitis (EOP vs. LOP), age, serum  
250 albumin and total Kt/V, were chosen for further adjustment in multivariate Cox



1  
2  
3  
4 251 proportional hazards model. After adjustment, there was no significant difference  
5  
6 252 between the EOP and LOP groups (Table 3). Fig. 2 describes cumulative survival by  
7  
8 253 EOP and LOP groups using the Kaplan-Meier analysis. Compared with LOP group,  
9  
10 254 cumulative survival was lower in the EOP group (Log rank 4.060,  $P=0.044$ ).

11 255

### 12 256 **Risk factors of early-onset peritonitis**

13  
14  
15  
16 257 Variables in Table 1 were tried in a univariate logistic regression model, and only  
17  
18 258 variables with  $P$  value  $< 0.10$  for peritonitis were depicted in Table 4. Based on the  
19  
20 259 simple logistic regression analysis of risk factors associated with EOP, we constructed  
21  
22 260 a multiple logistic regression model using variables including gender, age, CCI score,  
23  
24 261 diabetes, serum albumin and Kt/V. We found that higher CCI score (OR=1.285,  
25  
26 262 95%CI 1.058-1.561,  $P=0.011$ ), lower serum albumin level (OR=0.924, 95%CI  
27  
28 263 0.867-0.985,  $P=0.016$ ) and Kt/V (OR=0.600, 95%CI 0.394-0.915,  $P=0.018$ ) at the  
29  
30 264 start of PD, were significantly associated with EOP (Table 4).

31 265

### 32 266 **DISCUSSION**

33  
34  
35  
36  
37 267 Our retrospective cohort study of 357 PD patients showed that 74 (20.7%) patients in  
38  
39 268 three Shanghai dialysis centers developed the first episodes of peritonitis within the  
40  
41 269 first 6 months. Higher CCI score, lower serum albumin level and Kt/V at the start of  
42  
43 270 PD, were significantly associated with EOP. In addition, an early peritonitis onset  
44  
45 271 predicted a high peritonitis rate and technique failure.

46  
47 272 Early-onset peritonitis is a major complication of peritoneal dialysis, directly or  
48  
49 273 indirectly causing the abandon of dialysis treatment. In this study, among 213 patients  
50  
51 274 with peritonitis, 47 (22.1%) were due to Gram-positive organisms, 24 (11.3%) were  
52  
53 275 due to Gram-negative organisms, 6 (2.8%) were due to fungi. Staphylococcus was the  
54  
55 276 most common Gram-positive organism in both early-onset and late-onset peritonitis.  
56  
57 277 This bacterial flora distribution and high incidence of staphylococcus were similar to  
58  
59 278 previous reports.<sup>18-20</sup> Fungal peritonitis was rare in PD patients, but could bring out  
60

1  
2  
3  
4 279 irreversible peritoneal damage.<sup>21</sup> Recent clinical studies confirmed that the incidence  
5  
6 280 of fungal peritonitis was only 3%-6%,<sup>21</sup> while the relative mortality rate was up to  
7  
8 281 20%-30%.<sup>22</sup> The culture-negative proportion for the first peritonitis episode was high  
9  
10 282 in the LOP patients (89.2%). And the incidences of culture-negative peritonitis were  
11  
12 283 37.1% (13/35) in Shanghai East Hospital, 71.7% (38/53) in Shanghai Songjiang  
13  
14 284 District Central Hospital, 67.2% (84/125) in Baoshan branch of Shanghai First  
15  
16 285 People's Hospital ( $P=0.002$ ). The high culture-negative proportion may primary  
17  
18 286 attributed to early antibiotic treatment and limited effluent culture technique in  
19  
20 287 small-scale PD units. Before 2014, the technology of blood culture for PD effluent  
21  
22 288 has not been widely adopted by small-scale district hospitals in Shanghai. In the  
23  
24 289 district PD units, dialysate was inoculated onto solid medium and then incubated only  
25  
26 290 in aerobic environment. It accounted for about 60% of culture-negative peritonitis  
27  
28 291 patients in this investigation. Since 2015, all these three units in Shanghai choose  
29  
30 292 blood-culture bottle for the preferred technique to culture microorganism in PD  
31  
32 293 effluent. Lacking centrifugation of PD effluent and recent antibiotic usage may the  
33  
34 294 major reasons for the rest of 40% negative effluent cultures in this investigation. In  
35  
36 295 addition, culture negative peritonitis was higher in LOP than EOP group in the same  
37  
38 296 study period. Because LOP patients underwent dialysis more than 6 months and have  
39  
40 297 more experience in peritoneal dialysis. In the early stage of peritonitis, some of these  
41  
42 298 experienced PD patients will take dialysate to wash the peritoneum to relieve  
43  
44 299 abdominal pain. Diluted peritoneal fluid will result in a high negative rate of  
45  
46 300 peritoneal effluent culture. Considering the high culture negative rate in this study,  
47  
48 301 our three PD units will take a series of measures to improve our culture methods,  
49  
50 302 including centrifugation of PD effluent, incubation in aerobic, microaerophilic and  
51  
52 303 anaerobic environments, using antibiotic neutralization bottle and so on.<sup>13 14</sup>

54 304 By the end of the study, 509 episodes of peritonitis occurred in 213 patients, and  
55  
56 305 the peritonitis rate was 0.490 episodes per patient-year. The peritonitis rates in  
57  
58 306 Shanghai East Hospital, Shanghai Songjiang District Central Hospital and Baoshan  
59  
60

1  
2  
3  
4 307 Branch of Shanghai First People's Hospital were 0.41, 0.31 and 0.61 episodes per  
5  
6 308 patient-year respectively. Recently, some investigations from other areas of China  
7  
8 309 have indicated that the peritonitis rate was 0.196 episodes per patient-year in Taiwan  
9  
10 310 <sup>5</sup>, 0.158 episodes per patient-year in Guangzhou,<sup>7</sup> 0.296 episodes per patient-year in  
11  
12 311 Suzhou <sup>16</sup> and 0.158 per patient-year in Hangzhou <sup>8</sup>. Peritonitis rate in our study is  
13  
14 312 higher than the rest of China. Among the early-onset peritonitis patients who had  $\geq 3$   
15  
16 313 episodes of peritonitis, 25 patients from EOP group experienced recurrent peritonitis,  
17  
18 314 16 patients from EOP group experienced repeat peritonitis. 43.8% repeat patients  
19  
20 315 were staphylococcal peritonitis. And 75% EOP patients with  $\geq 3$  episodes of peritonitis  
21  
22 316 came from Baoshan Branch of Shanghai First People's Hospital. Most of them are  
23  
24 317 fishermen and live in the Chongming Island. Since the poorer economic abilities and  
25  
26 318 living conditions, they are easy to malnutrition and suffer peritonitis again [13, 14].  
27  
28 319 And lacking of home visit by PD nurses makes it difficult to determine which patients  
29  
30 320 require PD re-training. Lacking of technical improvement in small-scale PD units is  
31  
32 321 also the important reason for high peritonitis rate.

322 Our study found that lower serum albumin was one of the major risk factors for  
323  
324 early-onset peritonitis. Loss of protein would cause negative nitrogen balance and  
325  
326 malnutrition, leading to a decline in immune function and increased susceptibility to  
327  
328 pathogenic microorganisms.<sup>23</sup> Malnutrition was one of the most common  
329  
330 complications in PD patients, and plasma albumin level was an important clinical  
331  
332 predictor. Hypoalbuminemia was proved to be related with malnutrition, protein  
333  
334 losses, and inflammation.<sup>24 25</sup> Wang Qin et al. discovered that patients with an initial  
335  
336 serum albumin level less than 2.9 g/dL had a higher incidence of peritonitis and  
337  
338 regarded hypoalbuminemia as an independent predictor for subsequent peritonitis at  
339  
340 the start of PD therapy.<sup>26</sup> Further studies demonstrated that low serum albumin level  
341  
342 increased all-cause, cardiovascular, and infection related mortality in both PD and HD  
343  
344 patients.<sup>27</sup> In addition to peritoneal infection, hypoalbuminemia was also found to be  
345  
346 associated with septicemia, pneumonia and other inflammatory responses.<sup>28-32</sup> In this

1  
2  
3  
4 335 study, we reaffirmed that a low baseline serum albumin level is an independent risk  
5  
6 336 factors for EOP (OR=0.924, 95%CI 0.867-0.985, P=0.016).

7  
8 337 Although older age is not an independent risk factor for EOP, baseline data  
9  
10 338 showed that patients in EOP group older than LOP group (65.87±13.20 vs.  
11  
12 339 61.40±13.53, P=0.022). It was reported that elder patients were more likely to  
13  
14 340 progress to a worse outcome, including HD, renal transplantation or death.<sup>33</sup>  
15  
16 341 Incidence of malnutrition in elderly PD patients was more common than young and  
17  
18 342 middle-aged patients. Together with cardiovascular diseases, cerebrovascular disease,  
19  
20 343 hearing and visual impairments, all of these factors increase and aggravate the episode  
21  
22 344 of peritonitis.<sup>34-36</sup> Malnutrition in elder not only affected the quality of dialysis  
23  
24 345 patients' life, but also was an important factor in comorbidity and mortality.<sup>37</sup> Other  
25  
26 346 elements that increased the peritonitis susceptibility in elderly patients included  
27  
28 347 generalized functional deterioration, weakened immune system,<sup>38</sup> combined chronic  
29  
30 348 diseases, bad eyesight, poor aseptic concept, lack of compliance and living alone.  
31  
32 349 Their atypical clinical symptoms of peritonitis could be regarded as another essential  
33  
34 350 reason. Up-regulated pain threshold, unobtrusive bellyache and mild subjective  
35  
36 351 symptoms might cover up early-onset peritonitis until the occurrence of liquid  
37  
38 352 turbidity, which would delay the best time for treatment.

39  
40 353 Comparison in biochemical indicators shown that Kt/V and residual renal  
41  
42 354 function decreased significantly after early-onset peritonitis. Multivariate logistic  
43  
44 355 regression showed that lower total Kt/V (OR=0.600, 95%CI 0.394-0.915, P=0.018) at  
45  
46 356 the start of PD were associated with EOP. These results suggest that early infection  
47  
48 357 with peritonitis might further worsen renal function, especially the scavenging  
49  
50 358 capacity of solutes by residual kidney. Early inflammatory response and renal  
51  
52 359 function damage might be the underlying causes of peritonitis. Some studies  
53  
54 360 suggested that the survival rate of PD patients depends more on residual renal  
55  
56 361 function than the peritoneal cleaning capacity.<sup>39-41</sup> Harris et al. further put forward  
57  
58 362 that residual renal function less than  $4 \text{ ml}\cdot\text{min}^{-1}\cdot 1.73\text{m}^{-2}$  was associated with high  
59  
60

1  
2  
3  
4 363 mortality during peritoneal dialysis.<sup>42</sup> Therefore, we should pay close attention to the  
5  
6 364 change of residual renal function when monitoring the adequacy of dialysis.

7  
8 365 The relationship between peritonitis and technique failure and death have been  
9  
10 366 investigated in previous Chinese single-center studies.<sup>7 8</sup> A study in Chinese Zhejiang  
11  
12 367 province showed that, EOP was a significant predictor of all-cause mortality. As for  
13  
14 368 technique failure, they found no significant differences between EOP and LOP.<sup>8</sup>  
15  
16 369 However, a study in Chinese Guangzhou province indicated that technique failure in  
17  
18 370 EOP group was lower than LOP group, but patient survival did not differ between the  
19  
20 371 two groups.<sup>7</sup> Our present study showed that EOP was more likely a predictor of  
21  
22 372 technique failure (HR=1.801, 95%CI 0.996-3.257, P=0.051). There were no  
23  
24 373 differences between EOP and LOP for all-cause mortality. These conclusions might  
25  
26 374 be limited by regional and demographic differences in different dialysis center.  
27  
28 375 However, all three studies indicated that patients who experienced peritonitis early  
29  
30 376 after the initiation of PD were likely having more episodes of peritonitis. Repeating  
31  
32 377 peritonitis in EOP patients have an obvious impact on membrane permeability,  
33  
34 378 increasing severe systemic inflammation, reducing ultrafiltration and leading to worse  
35  
36 379 clinical outcomes.<sup>43</sup> Thus, appropriately dealing with the risk factors of early-onset  
37  
38 380 peritonitis will be good to reduce infection incidence, raise therapeutic effect of PD,  
39  
40 381 improve patient's life quality and prognosis.

41  
42 382 There are several limitations to this study. Firstly, this was a retrospective cohort  
43  
44 383 study, lacking of some objective information such as education level, economic  
45  
46 384 development and living standard, which may cause bias. Secondly, our study lacked  
47  
48 385 of the adjustment of different center factors (education, re-training and home visit) in  
49  
50 386 the multivariate analysis. Thirdly, although this was a multicenter study, the sample  
51  
52 387 size was relatively small. Further larger size and prospective investigation are  
53  
54 388 necessary.

55  
56 389

57  
58 390 **CONCLUSION**

1  
2  
3  
4 391 In summary, this retrospective cohort study found that a higher CCI score and lower  
5  
6 392 serum albumin and Kt/V before PD were significantly associated with EOP. In  
7  
8 393 addition, an early peritonitis onset predicted a high peritonitis rate and worse clinical  
9  
10 394 outcomes. Understanding the risk factors for EOP helps to develop effective measures  
11  
12 395 to prevent or delay the complication of peritoneal dialysis as much as possible.  
13  
14 396

15  
16 397 **Acknowledgements** The authors appreciate all the participants and their families.  
17  
18 398 They also thank the members of the study team from Shanghai East Hospital  
19  
20 399 Affiliated to Tongji University School of Medicine, Shanghai Songjiang District  
21  
22 400 Central Hospital and Baoshan Branch of Shanghai First People's Hospital for their  
23  
24 401 assistance in completing this project.  
25  
26 402

#### 27 28 403 **Author Contributors**

29  
30 404 X.M., Y.S. M.T. and X.J. contributed equally to this work. X.M., Y.S. M.T. and X.J.  
31  
32 405 performed the statistical analysis and wrote the manuscript; X.M., Y.S., M.T., X.J.,  
33  
34 406 Y.W., D.J., L.F., W.J., L.D. and X.Z. participated in the data collection; X.M., Y.S.,  
35  
36 407 S.Z. and N.L. contributed to discussion; X.M., S.Z. and N.L. participated in the  
37  
38 408 design of the study and edited the manuscript. All authors contributed to data  
39  
40 409 interpretation and revisions of the manuscript critically for important intellectual  
41  
42 410 content. All authors approved the final version of the submitted manuscript and  
43  
44 411 agreed to be accountable for all aspects of the work in ensuring that questions related  
45  
46 412 to the accuracy or integrity of any part of work are appropriately investigated and  
47  
48 413 resolved.  
49

#### 50 51 414 52 415 **Funding**

53  
54 416 This study was supported by the National Nature Science Foundation of China grants  
55  
56 417 (81670690, 81470991 and 81200492 to N.L., 81270778, 81470920, 81670623 and  
57  
58 418 81830021 to S.Z.), the Key Discipline Construction Project of Pudong Health Bureau  
59  
60

1  
2  
3  
4 419 of Shanghai (PWZxk2017-05 to N.L.), the Science Technology grant of Jiangxi  
5  
6 420 Province Municipal Health Commission (20184077 to L.F.), the Branch grant of  
7  
8 421 National key grants of Ministry of Science and Technology (2018YFA0108802 to  
9  
10 422 S.Z.), the US National Institutes of Health (2R01DK08506505A1 to S.Z.), the  
11  
12 423 Shanghai Scientific Committee of China (13PJ1406900 to N.L.).

13  
14 424 **Competing interests** None declared.

15  
16 425 **Patient consent** Obtained.

17  
18 426 **Ethics approval and consent to participate**

19  
20 427 The study was conducted according to the guidelines of the Helsinki Declaration and  
21  
22 428 was approved by the Human Research Ethics Committee of Shanghai East Hospital  
23  
24 429 Affiliated to Tongji University School of Medicine, Human Research Ethics  
25  
26 430 Committee of Shanghai Songjiang District Central Hospital and the Human Research  
27  
28 431 Ethics Committee of Baoshan Branch of Shanghai First People's Hospital. The human  
29  
30 432 research ethics committees approved this study and agreed to collect the information  
31  
32 433 from the hospital databases. They waived the need for participant consent.

33  
34 434 **Provenance and peer review** Not commissioned; externally peer reviewed.

35  
36  
37 435 **Data availability statement** The data sets generated and analyzed during the  
38  
39  
40 436 current study are available from the corresponding author upon reasonable request.

41  
42  
43 437 **Open Access** This is an Open Access article distributed in accordance with the  
44  
45 438 Creative Commons Attribution Non Commercial (CC BY-NC 4.0) license, which  
46  
47  
48 439 permits others to distribute, remix, adapt, build upon this work non-commercially, and  
49  
50  
51 440 license their derivative works on different terms, provided the original work is  
52  
53  
54 441 properly cited and the use is non-commercial.

55  
56 442 See: <http://creativecommons.org/licenses/by-nc/4.0/>

57  
58  
59 443 © Article author(s) (or their employer(s) unless otherwise stated in the text of the  
60

1  
2  
3  
4 444 article) 2018. All rights reserved. No commercial use is permitted unless otherwise  
5  
6  
7 445 expressly granted.  
8

9 446

10  
11 447 **REFERENCES**

- 12  
13 448 1. Li PK, Chow KM, Van de Luitgaarden MW, et al. Changes in the worldwide  
14  
15 449 epidemiology of peritoneal dialysis. *Nat Rev Nephrol* 2017;13:90-103.  
16  
17 450 2. Jain AK, Blake P, Cordy P, et al. Global trends in rates of peritoneal dialysis. *J Am*  
18  
19 451 *Soc Nephrol* 2012;23:533-44.  
20  
21 452 3. Cho Y, Johnson DW. Peritoneal dialysis-related peritonitis: towards improving  
22  
23 453 evidence, practices, and outcomes. *Am J Kidney Dis* 2014;64:278-89.  
24  
25 454 4. Thirugnanasambathan T, Hawley CM, Badve SV, et al. Repeated peritoneal  
26  
27 455 dialysis-associated peritonitis: a multicenter registry study. *Am J Kidney Dis*  
28  
29 456 2012;59:84-91.  
30  
31 457 5. Hsieh YP, Wang SC, Chang CC, et al. The negative impact of early peritonitis on  
32  
33 458 continuous ambulatory peritoneal dialysis patients. *Perit Dial Int* 2014;34:627-35.  
34  
35 459 6. See EJ, Johnson DW, Hawley CM, et al. Early peritonitis and its outcome in  
36  
37 460 incident peritoneal dialysis patients *Perit Dial Int* 2017.  
38  
39 461 7. Wu H, Huang R, Yi C, et al. Risk factors for early-onset peritonitis in southern  
40  
41 462 Chinese peritoneal dialysis patients. *Perit Dial Int* 2016;36:640-46.  
42  
43 463 8. Tian Y, Xie X, Xiang S, et al. Risk factors and outcomes of early-onset peritonitis  
44  
45 464 in Chinese peritoneal dialysis patients. *Kidney Blood Press Res* 2017;42:1266-76.  
46  
47 465 9. Béchade C, Guittet L, Evans D, et al. Early failure in patients starting peritoneal  
48  
49 466 dialysis: a competing risks approach. *Nephrol Dial Transplant* 2014;29:2127-35.  
50  
51 467 10. Feng S, Wang Y, Qiu B, et al. Impact of early-onset peritonitis on mortality and  
52  
53 468 technique survival in peritoneal dialysis patients. *Springerplus* 2016;5:1676.  
54  
55 469 11. Fourtounas C, Savidaki E, Dousdabanis P, et al. Peritonitis during the first year  
56  
57 470 after commencement of peritoneal dialysis has an impact on technique survival  
58  
59 471 and patient morbidity. *Adv Perit Dial* 2006;22:50-4.



- 1  
2  
3  
4 472 12. Chinese Expert Group on Peritoneal Dialysis Catheterization. Chinese guidelines  
5 for peritoneal dialysis catheterization. *Chinese J Nephrol* 2016;32:867-71.  
6 473  
7  
8 474 13. Li PK, Szeto CC, Piraino B, et al. ISPD peritonitis recommendations: 2016 update  
9 on prevention and treatment. *Perit Dial Int* 2016;36:481-508.  
10 475  
11  
12 476 14. Szeto CC, Li PK, Johnson DW, et al. ISPD catheter-related infection  
13 recommendations: 2017 Update. *Perit Dial Int* 2017;37:141-54.  
14 477  
15  
16 478 15. Li PK, Szeto CC, Piraino B, et al. Peritoneal dialysis-related infections  
17 recommendations: 2010 update. *Perit Dial Int* 2010;30:393-423.  
18 479  
19  
20 480 16. Wang Z, Jiang L, Feng S, et al. Early peritonitis is an independent risk factor for  
21 mortality in elderly peritoneal dialysis patients. *Kidney Blood Press Res*  
22 481 2015;40:298-305.  
23 482  
24  
25  
26 483 17. Shen JI, Mitani AA, Saxena AB, et al. Determinants of peritoneal dialysis  
27 technique failure in incident US patients. *Perit Dial Int* 2013;33:155-66.  
28 484  
29  
30 485 18. Hsieh Y, Wang S, Chang C, et al. The negative impact of early peritonitis on  
31 continuous ambulatory peritoneal dialysis patients. *Perit Dial Int* 2014;34:627-35.  
32 486  
33  
34 487 19. Barretti P, Doles J, Pinotti D, et al. Efficacy of antibiotic therapy for peritoneal  
35 dialysis-associated peritonitis: a proportional meta-analysis. *BMC Infect Dis*  
36 488 2014;14:445.  
37 489  
38  
39  
40 490 20. Govindarajulu S, Hawley C, McDonald S, et al. Staphylococcus aureus peritonitis  
41 in Australian peritoneal dialysis patients: predictors, treatment, and outcomes in  
42 491 503 cases. *Perit Dial Int* 2010;30:311-9.  
43 492  
44  
45  
46 493 21. Matuszkiewicz-Rowinska J. Update on fungal peritonitis and its treatment. *Perit*  
47 494 *Dial Int* 2009;29 Suppl 2:S161-5.  
48  
49  
50 495 22. Szeto C, Chow K. Gram-negative peritonitis--the Achilles heel of peritoneal  
51 dialysis? *Perit Dial Int* 2007;27 Suppl 2:S267-71.  
52 496  
53  
54 497 23. Li Z, An X, Mao H, et al. Association between depression and  
55 malnutrition-inflammation complex syndrome in patients with continuous  
56 498 ambulatory peritoneal dialysis. *Int Urol Nephrol* 2011;43:875-82.  
57 499  
58  
59  
60

- 1  
2  
3  
4 500 24. Fanali G, di Masi A, Trezza V, et al. Human serum albumin: from bench to  
5  
6 501 bedside. *Mol Aspects Med* 2012;33:209-90.
- 7  
8 502 25. Yu Z, Tan B, Dainty S, et al. Hypoalbuminaemia, systemic albumin leak and  
9  
10 503 endothelial dysfunction in peritoneal dialysis patients. *Nephrol Dial Transplant*  
11  
12 504 2012;27:4437-45.
- 13  
14 505 26. Wang Q, Bernardini J, Piraino B, et al. Albumin at the start of peritoneal dialysis  
15  
16 506 predicts the development of peritonitis. *Am J Kidney Dis* 2003;41:664-9.
- 17  
18 507 27. Mehrotra R, Duong U, Jiwakanon S, et al. Serum albumin as a predictor of  
19  
20 508 mortality in peritoneal dialysis: comparisons with hemodialysis. *Am J Kidney Dis*  
21  
22 509 2011;58:418-28.
- 23  
24 510 28. Seo M, Choa M, You J, et al. Hypoalbuminemia, low base excess values, and  
25  
26 511 tachypnea predict 28-day mortality in severe sepsis and septic shock patients in  
27  
28 512 the emergency department. *Yonsei Med J* 2016;57:1361-9.
- 29  
30 513 29. Mizuno T, Mizokami F, Fukami K, et al. The influence of severe  
31  
32 514 hypoalbuminemia on the half-life of vancomycin in elderly patients with  
33  
34 515 methicillin-resistant *Staphylococcus aureus* hospital-acquired pneumonia. *Clin*  
35  
36 516 *Interv Aging* 2013;8:1323-8.
- 37  
38 517 30. Juneja M, Baidoo L, Schwartz M, et al. Geriatric inflammatory bowel disease:  
39  
40 518 phenotypic presentation, treatment patterns, nutritional status, outcomes, and  
41  
42 519 comorbidity. *Dig Dis Sci* 2012;57:2408-15.
- 43  
44 520 31. Don B, Kaysen G. Serum albumin: relationship to inflammation and nutrition.  
45  
46 521 *Semin Dial* 2004;17:432-7.
- 47  
48 522 32. Magnussen B, Oren Gradel K, Gorm Jensen T, et al. Association between  
49  
50 523 hypoalbuminaemia and mortality in patients with community-acquired  
51  
52 524 bacteraemia is primarily related to acute disorders. *PLoS ONE* 2016;11:e0160466.
- 53  
54 525 33. Maitra S, Burkart J, Fine A, et al. Patients on chronic peritoneal dialysis for ten  
55  
56 526 years or more in North America. *Perit Dial Int* 2000;20 Suppl 2:S127.
- 57  
58 527 34. Sakaci T, Ahbap E, Koc Y, et al. Clinical outcomes and mortality in elderly  
59  
60

- 1  
2  
3  
4 528 peritoneal dialysis patients. *Clinics (Sao Paulo)* 2015;70:363-8.
- 5  
6 529 35. Valderrabano F, Jofre R, Lopez-Gomez JM. Quality of life in end-stage renal  
7  
8 530 disease patients. *Am J Kidney Dis* 2001;38:443-64.
- 9  
10 531 36. Joly D, Anglicheau D, Alberti C, et al. Octogenarians reaching end-stage renal  
11  
12 532 disease: cohort study of decision-making and clinical outcomes. *J Am Soc*  
13  
14 533 *Nephrol* 2003;14:1012-21.
- 15  
16 534 37. Tennankore KK, Bargman JM. Nutrition and the kidney: recommendations for  
17  
18 535 peritoneal dialysis. *Adv Chronic Kidney Dis* 2013;20:190-201.
- 19  
20 536 38. Hsieh YP, Chang CC, Wen YK, et al. Predictors of peritonitis and the impact of  
21  
22 537 peritonitis on clinical outcomes of continuous ambulatory peritoneal dialysis  
23  
24 538 patients in Taiwan—10 years' experience in a single center. *Perit Dial Int*  
25  
26 539 2014;34:85.
- 27  
28 540 39. Szeto C, Kwan B, Chow K, et al. Predictors of residual renal function decline in  
29  
30 541 patients undergoing continuous ambulatory peritoneal dialysis. *Perit Dial Int*  
31  
32 542 2015;35:180-8.
- 33  
34 543 40. Vilar E, Farrington K. Emerging importance of residual renal function in  
35  
36 544 end-stage renal failure. *Semin Dial* 2011;24:487-94.
- 37  
38 545 41. Raimann J, Kitzler T, Levin N. Factors affecting loss of residual renal function(s)  
39  
40 546 in dialysis. *Contrib Nephrol* 2012;178:150-6.
- 41  
42 547 42. Harris S, Lamping D, Brown E, et al. Clinical outcomes and quality of life in  
43  
44 548 elderly patients on peritoneal dialysis versus hemodialysis. *Perit Dial Int*  
45  
46 549 2002;22:463-70.
- 47  
48 550 43. van Diepen AT, van Esch S, Struijk DG, et al. The first peritonitis episode alters  
49  
50 551 the natural course of peritoneal membrane characteristics in peritoneal dialysis  
51  
52 552 patients. *Perit Dial Int* 2015;35:324-32.
- 53  
54  
55 553  
56  
57  
58 554  
59  
60 555

556

Table 1. Baseline characteristic of the study population

| Variable                             | Peritonitis-free<br>(N=144) | EOP<br>(N=74)     | LOP<br>(N=139)    | P value between<br>EOP and LOP | P value |
|--------------------------------------|-----------------------------|-------------------|-------------------|--------------------------------|---------|
| Age (years)                          | 63.18±13.91                 | 65.87±13.20       | 61.40±13.53       | 0.022                          | 0.075   |
| Gender (male, n, %)                  | 84 (58.3)                   | 37 (50.0)         | 90 (64.7)         | 0.037                          | 0.135   |
| Smoking (%)                          | 40 (27.8)                   | 22 (29.7)         | 31 (22.3)         | 0.233                          | 0.415   |
| Drinking (%)                         | 31 (21.5)                   | 20 (27.0)         | 32 (23.0)         | 0.517                          | 0.659   |
| Charlson comorbidity index score     | 3.76±1.51                   | 5.73±2.17         | 4.42±1.93         | <0.001                         | <0.001  |
| Body mass index (kg/m <sup>2</sup> ) | 23.55±3.76                  | 24.19±3.31        | 24.32±3.38        | 0.791                          | 0.174   |
| Hemoglobin (g/L)                     | 83.67±17.70                 | 89.10±22.90       | 88.53±19.77       | 0.849                          | 0.059   |
| Serum calcium (mmol/L)               | 1.98±0.29                   | 2.14±0.41         | 2.11±0.33         | 0.514                          | 0.001   |
| Serum phosphorus (mmol/L)            | 1.77±0.55                   | 1.91±0.61         | 1.83±0.78         | 0.457                          | 0.349   |
| Serum potassium (mmol/L)             | 4.39±0.65                   | 4.41±0.74         | 4.39±0.80         | 0.865                          | 0.980   |
| Fasting blood glucose (mmol/L)       | 5.38±2.01                   | 6.49±2.93         | 6.09±2.10         | 0.261                          | 0.001   |
| TC (mmol/L)                          | 4.02 (3.36, 5.11)           | 4.59 (3.54, 6.06) | 4.43 (3.57, 5.70) | 0.537                          | 0.022   |
| TG (mmol/L)                          | 1.28 (0.97, 1.74)           | 1.30 (1.00, 2.39) | 1.24 (1.00, 2.17) | 0.469                          | 0.430   |
| HDL-C (mmol/L)                       | 1.11 (0.85, 1.33)           | 1.18 (0.97, 1.43) | 1.19 (0.98, 1.48) | 0.740                          | 0.042   |
| LDL-C (mmol/L)                       | 2.44 (1.94, 3.11)           | 2.65 (2.01, 3.25) | 2.38 (2.00, 3.09) | 0.238                          | 0.473   |
| Serum albumin (g/L)                  | 33.26±6.26                  | 30.01±7.15        | 33.37±4.92        | <0.001                         | <0.001  |
| Serum uric acid (mmol/L)             | 516.93±142.32               | 495.46±183.30     | 536.48±185.05     | 0.124                          | 0.231   |
| Serum creatinine (µmol/L)            | 659.74±185.48               | 749.77±268.11     | 660.42±302.69     | 0.034                          | 0.027   |
| Blood urea nitrogen (mmol/L)         | 24.49±7.72                  | 25.69±10.73       | 24.51±9.85        | 0.421                          | 0.616   |
| eGFR (ml/min/1.73 m <sup>2</sup> )   | 8.49±3.25                   | 6.84±3.82         | 8.48±4.13         | 0.005                          | 0.003   |
| Total Kt/V                           | 2.31 (1.98, 2.56)           | 2.10 (1.71, 2.54) | 2.33 (1.93, 3.04) | 0.008                          | 0.012   |
| Diabetes mellitus(%)                 | 64 (44.4)                   | 54 (73.0)         | 79 (56.8)         | 0.021                          | <0.001  |
| Hypertension (%)                     | 126 (87.5)                  | 66 (89.2)         | 116 (83.5)        | 0.258                          | 0.439   |
| Dyslipidemia (%)                     | 54 (37.5)                   | 41 (55.4)         | 74 (53.2)         | 0.762                          | 0.009   |
| Cardiovascular disease (%)           | 43 (29.9)                   | 30 (40.5)         | 51 (36.7)         | 0.582                          | 0.241   |
| Cerebrovascular disease (%)          | 21 (14.6)                   | 30 (40.5)         | 55 (39.6)         | 0.890                          | <0.001  |
| Calcium                              | 90 (62.5)                   | 44 (59.5)         | 72 (51.8)         | 0.285                          | 0.179   |
| Iron                                 | 73 (50.7)                   | 41 (55.4)         | 68 (48.9)         | 0.367                          | 0.664   |
| Anti-diabetic medications (%)        | 54 (37.5)                   | 38 (51.4)         | 46 (33.1)         | 0.009                          | 0.031   |
| Anti-hypertension medications (%)    | 124 (86.1)                  | 65 (87.8)         | 112 (80.6)        | 0.178                          | 0.284   |
| Lipid-lowering medications (%)       | 38 (26.4)                   | 36 (48.6)         | 61 (43.9)         | 0.506                          | 0.001   |
| Cause of ESKD                        |                             |                   |                   | 0.182                          | 0.008   |
| Glomerulonephritis (%)               | 57 (39.6)                   | 29 (39.2)         | 68 (48.9)         |                                |         |
| Diabetes (%)                         | 42 (29.2)                   | 34 (45.9)         | 46 (33.1)         |                                |         |
| Other (%)                            | 45 (31.3)                   | 11 (14.9)         | 25 (18.0)         |                                |         |
| Peritonitis episodes (%)             |                             |                   |                   | 0.006                          | 0.006   |
| 1                                    |                             | 17 (23.0)         | 57 (41.0)         |                                |         |
| 2                                    |                             | 16 (21.6)         | 35 (25.2)         |                                |         |
| ≥3                                   |                             | 41 (55.4)         | 47 (33.8)         |                                |         |

EOP, early-onset peritonitis; LOP, late-onset peritonitis; TC, total cholesterol; TG total triglyceride; HDL-C, high-density lipoprotein cholesterol; LDL-C, low-density lipoprotein cholesterol; GFR, glomerular filtration rate; ESKD, end stage kidney disease

557

558

559

560

561 Table 2. Organism and outcome of different vintages of peritonitis (n, %)

| Causative organisms          | Early-onset peritonitis |        | Late-onset peritonitis |        | P value |
|------------------------------|-------------------------|--------|------------------------|--------|---------|
|                              | episodes                | (n)    | episodes               | (n)    |         |
| Causative organisms          |                         |        |                        |        |         |
| Gram-positive organisms      | 38                      | (51.4) | 9                      | (6.5)  | <0.001  |
| Staphylococcus aureus        | 7                       | (18.4) | 0                      | (0.0)  | 0.163   |
| Coagulase-negative           | 3                       | (7.9)  | 0                      | (0.0)  | 0.384   |
| Staphylococcus               | 16                      | (42.1) | 8                      | (88.9) | 0.012   |
| Streptococcus species        | 4                       | (10.5) | 1                      | (11.1) | 0.959   |
| Enterococcus species         | 4                       | (10.5) | 0                      | (0.0)  | 0.309   |
| Other Gram-positives         | 4                       | (10.5) | 0                      | (0.0)  | 0.309   |
| Gram-negative organisms      | 20                      | (27.0) | 4                      | (2.9)  | <0.001  |
| Escherichia coli             | 8                       | (40.0) | 0                      | (0.0)  | 0.121   |
| Klebsiella species           | 6                       | (30.0) | 1                      | (25.0) | 0.841   |
| Acinetobacter species        | 4                       | (20.0) | 1                      | (25.0) | 0.822   |
| Pseudomonas Aeruginosa       | 2                       | (10.0) | 1                      | (25.0) | 0.408   |
| Other Gram-negatives         | 0                       | (0.0)  | 1                      | (25.0) | 0.022   |
| Fungi                        | 4                       | (5.4)  | 2                      | (1.4)  | 0.096   |
| Multiple organisms           | 1                       | (1.4)  | 0                      | (0.0)  | 0.170   |
| Culture-negative peritonitis | 11                      | (14.9) | 124                    | (89.2) | <0.001  |
| Outcomes                     |                         |        |                        |        |         |
| Complete cure                | 13                      | (17.6) | 47                     | (33.8) |         |
| Relapse or recurrence        | 25                      | (33.8) | 45                     | (32.4) |         |
| Transfer to hemodialysis     | 20                      | (27.0) | 27                     | (19.4) |         |
| Death                        | 16                      | (21.6) | 20                     | (14.4) |         |

562

563

564

565

566

567

568

569

570

571

572

573

574

575

576

577

578

579 Table 3. Cox proportional hazards model for technique failure and patient mortality.

| Variable                                | Univariate Cox regression analysis |             |         | Multivariate Cox regression analysis |             |         |
|-----------------------------------------|------------------------------------|-------------|---------|--------------------------------------|-------------|---------|
|                                         | HR                                 | (95%CI)     | P value | HR                                   | (95%CI)     | P value |
| <b>Technique failure</b>                |                                    |             |         |                                      |             |         |
| Time to first peritonitis (EOP vs. LOP) | 1.801                              | 0.996-3.257 | 0.051   | 1.801                                | 0.996-3.257 | 0.051   |
| Age (year)                              | 1.004                              | 0.982-1.026 | 0.742   |                                      |             |         |
| Sex (men vs. women)                     | 1.045                              | 0.578-1.892 | 0.884   |                                      |             |         |
| Smoking (yes vs. no)                    | 1.112                              | 0.583-2.120 | 0.747   |                                      |             |         |
| Drinking (yes vs. no)                   | 0.750                              | 0.371-1.517 | 0.424   |                                      |             |         |
| Charlson comorbidity index score        | 1.103                              | 0.972-1.252 | 0.130   |                                      |             |         |
| Body mass index (kg/m <sup>2</sup> )    | 1.043                              | 0.953-1.140 | 0.361   |                                      |             |         |
| Hemoglobin (g/L)                        | 1.003                              | 0.990-1.016 | 0.655   |                                      |             |         |
| Total cholesterol (mmol/L)              | 0.979                              | 0.784-1.222 | 0.849   |                                      |             |         |
| Total triglyceride (mmol/L)             | 0.936                              | 0.676-1.297 | 0.691   |                                      |             |         |
| Serum albumin (g/L)                     | 0.990                              | 0.941-1.040 | 0.686   |                                      |             |         |
| Total Kt/V                              | 1.008                              | 0.737-1.379 | 0.959   |                                      |             |         |
| Diabetes (yes vs. no)                   | 1.383                              | 0.742-2.579 | 0.307   |                                      |             |         |
| <b>Patient mortality</b>                |                                    |             |         |                                      |             |         |
| Time to first peritonitis (EOP vs. LOP) | 1.968                              | 1.006-3.851 | 0.048   | 1.010                                | 0.391-2.606 | 0.984   |
| Age (year)                              | 1.037                              | 1.014-1.061 | 0.002   | 1.002                                | 0.973-1.031 | 0.917   |
| Sex (men vs. women)                     | 0.862                              | 0.498-1.492 | 0.596   |                                      |             |         |
| Smoking (yes vs. no)                    | 0.755                              | 0.344-1.659 | 0.484   |                                      |             |         |
| Drinking (yes vs. no)                   | 0.489                              | 0.200-1.191 | 0.115   |                                      |             |         |
| Charlson comorbidity index score        | 0.999                              | 0.878-1.138 | 0.990   |                                      |             |         |
| Body mass index (kg/m <sup>2</sup> )    | 0.977                              | 0.872-1.096 | 0.695   |                                      |             |         |
| Hemoglobin (g/L)                        | 0.996                              | 0.981-1.011 | 0.591   |                                      |             |         |
| Total cholesterol (mmol/L)              | 0.835                              | 0.647-1.078 | 0.167   |                                      |             |         |
| Total triglyceride (mmol/L)             | 0.956                              | 0.664-1.378 | 0.810   |                                      |             |         |
| Serum albumin (g/L)                     | 0.949                              | 0.907-0.993 | 0.025   | 0.965                                | 0.897-1.039 | 0.346   |
| Total Kt/V                              | 0.650                              | 0.409-1.033 | 0.069   | 0.683                                | 0.425-1.099 | 0.116   |
| Diabetes (yes vs. no)                   | 1.176                              | 0.672-2.057 | 0.570   |                                      |             |         |

580

581

582

583

584

585

586

587

588

589

590

591

Table 4. Logistic regression analysis of factors associated with early-onset peritonitis

| Variable                         | Univariate logistic regression analysis |             |         | Multivariate logistic regression analysis |             |         |
|----------------------------------|-----------------------------------------|-------------|---------|-------------------------------------------|-------------|---------|
|                                  | OR                                      | (95%CI)     | P value | OR                                        | (95%CI)     | P value |
| Sex (men vs. women)              | 0.544                                   | 0.307-0.966 | 0.038   | 0.586                                     | 0.295-1.163 | 0.126   |
| Age (year)                       | 1.026                                   | 1.004-1.049 | 0.023   | 1.020                                     | 0.994-1.046 | 0.131   |
| Charlson comorbidity index score | 1.355                                   | 1.173-1.566 | <0.001  | 1.285                                     | 1.058-1.561 | 0.011   |
| Diabetes                         | 2.051                                   | 1.111-3.786 | 0.022   | 1.084                                     | 0.457-2.571 | 0.854   |
| Serum albumin (g/L)              | 0.901                                   | 0.853-0.951 | <0.001  | 0.924                                     | 0.867-0.985 | 0.016   |
| Total Kt/V                       | 0.553                                   | 0.370-0.827 | 0.004   | 0.600                                     | 0.394-0.915 | 0.018   |

592

593

594

595

596

597

598

599

600

601

602

603

604

605

606

607

608

609

610

611

612

613

614

615

616

617

618

619

620

621

622

623

624

1  
2  
3  
4 625 **Figure legends**

5  
6 626 **Fig.1. Technique survival according to EOP and LOP.**

7  
8 627 Death were censored form the technique survival analysis. Log rank test Chi-square

9  
10 628 3.943,  $P=0.047$

11  
12 629

13  
14 630

15  
16 631 **Fig.2. Patient survival according to EOP and LOP.**

17  
18 632 Patients who transferred to HD were censored form the patient survival analysis. Log

19  
20 633 rank test Chi-square 4.060,  $P=0.044$

21  
22 634

23  
24 635  
25  
26  
27  
28  
29  
30  
31  
32  
33  
34  
35  
36  
37  
38  
39  
40  
41  
42  
43  
44  
45  
46  
47  
48  
49  
50  
51  
52  
53  
54  
55  
56  
57  
58  
59  
60



1  
2  
3  
4  
5  
6  
7  
8  
9  
10  
11  
12  
13  
14  
15  
16  
17  
18  
19  
20  
21  
22  
23  
24  
25  
26  
27  
28  
29  
30  
31  
32  
33  
34  
35  
36  
37  
38  
39  
40  
41  
42  
43  
44  
45  
46  
47  
48  
49  
50  
51  
52  
53  
54  
55  
56  
57  
58  
59  
60



Fig.1. Technique survival according to EOP and LOP. Death were censored form the technique survival analysis. Log rank test Chi-square 3.943, P=0.047

113x111mm (300 x 300 DPI)



Fig.2. Patient survival according to EOP and LOP. Patients who transferred to HD were censored from the patient survival analysis. Log rank test Chi-square 4.060, P=0.044

111x108mm (300 x 300 DPI)

STROBE 2007 (v4) Statement—Checklist of items that should be included in reports of *cohort studies*

| Section/Topic        | Item # | Recommendation                                                                                                                                                                                                                                                                                                                                                                                                                                                                                                                                                                                                                                                                                                                                                                                                                                                                                                                                                                                                                                                                                                                                                                                                                                                                                                                                                                                                                                                                                                                                                                                                                                                                                                                                                                                                                                                                                                                                                                                                                                                                                                                                                                          | Reported on page # |
|----------------------|--------|-----------------------------------------------------------------------------------------------------------------------------------------------------------------------------------------------------------------------------------------------------------------------------------------------------------------------------------------------------------------------------------------------------------------------------------------------------------------------------------------------------------------------------------------------------------------------------------------------------------------------------------------------------------------------------------------------------------------------------------------------------------------------------------------------------------------------------------------------------------------------------------------------------------------------------------------------------------------------------------------------------------------------------------------------------------------------------------------------------------------------------------------------------------------------------------------------------------------------------------------------------------------------------------------------------------------------------------------------------------------------------------------------------------------------------------------------------------------------------------------------------------------------------------------------------------------------------------------------------------------------------------------------------------------------------------------------------------------------------------------------------------------------------------------------------------------------------------------------------------------------------------------------------------------------------------------------------------------------------------------------------------------------------------------------------------------------------------------------------------------------------------------------------------------------------------------|--------------------|
| Title and abstract   | 1      | The analysis of risk factors and outcome in peritoneal dialysis patients with early-onset peritonitis: a multi-center, retrospective, cohort study.                                                                                                                                                                                                                                                                                                                                                                                                                                                                                                                                                                                                                                                                                                                                                                                                                                                                                                                                                                                                                                                                                                                                                                                                                                                                                                                                                                                                                                                                                                                                                                                                                                                                                                                                                                                                                                                                                                                                                                                                                                     | 1                  |
|                      |        | <p><b>Objectives</b> To investigate the risk factors associated with early-onset peritonitis (EOP) and its influence on patients' technique survival and mortality.</p> <p><b>Study design</b> Retrospective, cohort study.</p> <p><b>Setting</b> Three peritoneal dialysis units in Shanghai.</p> <p><b>Participants</b> PD patients from June 1, 2006, to May 1, 2018, were recruited and followed up until December 31, 2018. According to time-to-first episode of peritonitis, patients were divided into non-peritonitis (n=144), early-onset peritonitis (<math>\leq 6</math> months, n=74) and late-onset peritonitis (LOP) (<math>&gt; 6</math> months, n=139).</p> <p><b>Primary and secondary outcome measures</b> EOP was defined as the first episode of peritonitis occurring within 6 months after the initiation of peritoneal dialysis (PD). The outcomes were all-cause mortality and technique failure.</p> <p><b>Results</b> Of the 357 patients, 74 (20.7%) patients developed their first episode of peritonitis within the first 6 months. Compared with the LOP group, the EOP group had older ages, more female patients, higher Charlson comorbidity index (CCI) score, lower serum albumin levels and renal function at the time of initiation of PD and higher diabetes mellitus and peritonitis rates (<math>P&lt;0.05</math>). Staphylococcus was the most common Gram-positive organism in both EOP and LOP groups. The multivariate logistic regression analysis showed that factors associated with EOP included a higher CCI score (odds ratio (OR) 1.285, <math>P=0.011</math>), lower serum albumin level (OR 0.924, <math>P=0.016</math>) and lower Kt/V (OR 0.600, <math>P=0.018</math>) at start of PD. In the Cox proportional hazards model, EOP was more likely a predictor of technique failure (hazard ratio (HR) 1.801, <math>P=0.051</math>). There was no difference between EOP and LOP for all-cause mortality.</p> <p><b>Conclusion</b> A higher CCI score and lower serum albumin level and Kt/V at PD initiation were significantly associated with EOP. EOP also predicted a high peritonitis rate and poor clinical outcomes.</p> | 2                  |
| <b>Introduction</b>  |        |                                                                                                                                                                                                                                                                                                                                                                                                                                                                                                                                                                                                                                                                                                                                                                                                                                                                                                                                                                                                                                                                                                                                                                                                                                                                                                                                                                                                                                                                                                                                                                                                                                                                                                                                                                                                                                                                                                                                                                                                                                                                                                                                                                                         |                    |
| Background/rationale | 2      | The definition of early-onset peritonitis varies widely between studies, which generally refers to peritoneal dialysis related peritonitis occurring within 3-24 months after surgical catheterization. <sup>5-8</sup> Previous studies showed that the first episode of peritonitis in PD patients could significantly affect the prognosis of end-stage renal disease (ESRD) patients. <sup>9</sup> However, few studies have specifically examined the risk factors for peritonitis in the early PD period. And most of these were observational cohort studies carried out in single centers, <sup>5 10 11</sup> limiting the generalizability of their observed outcomes. To                                                                                                                                                                                                                                                                                                                                                                                                                                                                                                                                                                                                                                                                                                                                                                                                                                                                                                                                                                                                                                                                                                                                                                                                                                                                                                                                                                                                                                                                                                       | 4                  |

|                              |    |                                                                                                                                                                                                                                                                                                                                                                                                                                                                                                                                                                                                                                                                                                                                         |   |
|------------------------------|----|-----------------------------------------------------------------------------------------------------------------------------------------------------------------------------------------------------------------------------------------------------------------------------------------------------------------------------------------------------------------------------------------------------------------------------------------------------------------------------------------------------------------------------------------------------------------------------------------------------------------------------------------------------------------------------------------------------------------------------------------|---|
|                              |    | determine the risk factors for early-onset peritonitis in Chinese CKD patients and its influence on patients' technique survival and mortality, we conducted this multiple-center, retrospective cohort study.                                                                                                                                                                                                                                                                                                                                                                                                                                                                                                                          |   |
| Objectives                   | 3  | PD patients from June 1, 2006, to May 1, 2018, were recruited and followed up until December 31, 2018. According to time-to-first episode of peritonitis, patients were divided into non-peritonitis (n=144), early-onset peritonitis ( $\leq 6$ months, n=74) and late-onset peritonitis (LOP) ( $> 6$ months, n=139).                                                                                                                                                                                                                                                                                                                                                                                                                 | 4 |
| <b>Methods</b>               |    |                                                                                                                                                                                                                                                                                                                                                                                                                                                                                                                                                                                                                                                                                                                                         |   |
| Study design                 | 4  | Retrospective, cohort study.                                                                                                                                                                                                                                                                                                                                                                                                                                                                                                                                                                                                                                                                                                            | 4 |
| Setting                      | 5  | Three peritoneal dialysis units in Shanghai.                                                                                                                                                                                                                                                                                                                                                                                                                                                                                                                                                                                                                                                                                            | 4 |
| Participants                 | 6  | This was a multi-center retrospective cohort study included 357 patients with ESRD who underwent PD in Department of Nephrology in Baoshan branch of Shanghai First People's Hospital, Shanghai Songjiang District Central Hospital and Shanghai East Hospital, Tongji University School of Medicine. All incident PD patients from June 1, 2006, to May 1, 2018, were recruited and followed up until December 31, 2018. The exclusion criteria were as follows: patients who had been using PD for fewer than 90 days, patients with an age younger than 18 years and patients who initiated PD in other PD centers and previously accepted HD or kidney transplantation.                                                             | 4 |
|                              |    | According to time-to-first episode of peritonitis, patients were divided into non-peritonitis (n=144), early-onset peritonitis ( $\leq 6$ months, n=74) and late-onset peritonitis (LOP) ( $> 6$ months, n=139).                                                                                                                                                                                                                                                                                                                                                                                                                                                                                                                        | 4 |
| Variables                    | 7  | We collected baseline characteristics within 1-3 months from the start of PD, including demographic data (age, gender, smoking, drinking, CCI, BMI), medical history, drug-taking history, biochemical data (hemoglobin, serum electrolyte, fasting blood glucose, total cholesterol, total triglyceride, high-density lipoprotein cholesterol, low-density lipoprotein cholesterol, and serum albumin, uric acid, creatinine, blood urea nitrogen, estimated glomerular filtration rate (eGFR), the clearance rate of urea nitrogen (Kt/V), cause of ESRD, peritonitis episodes. Peritoneal fluid effluent from patients with peritonitis was collected and cultured for 1 to 5 days to identify the bacterial flora in the dialysate. | 6 |
| Data sources/<br>measurement | 8* | Peritoneal fluid effluent from patients with peritonitis was collected and cultured for 1 to 5 days to identify the bacterial flora in the dialysate.                                                                                                                                                                                                                                                                                                                                                                                                                                                                                                                                                                                   | 6 |
| Bias                         | 9  | This was a retrospective cohort study, lacking of some objective information such as education level, economic development and living standard, which may cause bias.                                                                                                                                                                                                                                                                                                                                                                                                                                                                                                                                                                   | 3 |
| Study size                   | 10 | 357 PD patients                                                                                                                                                                                                                                                                                                                                                                                                                                                                                                                                                                                                                                                                                                                         | 4 |
| Quantitative variables       | 11 | The normal distributed data were showed as mean $\pm$ standard deviation (SD) and the skewed data were showed as median values with the 25th to 75th percentile intervals. As for normally distributed data, student's t-test is using for analyzing the differences between the EOP group and LOP group, while one-way ANOVA for differences among in non-peritonitis, EOP group and LOP groups. The Wilcoxon rank sum test for skewed continuous data.                                                                                                                                                                                                                                                                                | 7 |

|                                                                               |                     |     |                                                                                                                                                                                                                                                                                                                                                                                                                                                                                                                                                                                                                                                                                                                                                                                                                                                                                                                                                                                                                                                                                                                                                                                                                                                                                                                                             |      |
|-------------------------------------------------------------------------------|---------------------|-----|---------------------------------------------------------------------------------------------------------------------------------------------------------------------------------------------------------------------------------------------------------------------------------------------------------------------------------------------------------------------------------------------------------------------------------------------------------------------------------------------------------------------------------------------------------------------------------------------------------------------------------------------------------------------------------------------------------------------------------------------------------------------------------------------------------------------------------------------------------------------------------------------------------------------------------------------------------------------------------------------------------------------------------------------------------------------------------------------------------------------------------------------------------------------------------------------------------------------------------------------------------------------------------------------------------------------------------------------|------|
| 1<br>2<br>3<br>4<br>5<br>6<br>7<br>8<br>9<br>10<br>11<br>12<br>13<br>14<br>15 | Statistical methods | 12  | All statistical analyses were performed by SPSS 20.0 for Windows (IBM Corp., Armonk, NY, USA). The normal distributed data were showed as mean±standard deviation (SD) and the skewed data were showed as median values with the 25th to 75th percentile intervals. Categorical data were expressed as frequency (n) and percentage (%). As for normally distributed data, student's t-test is using for analyzing the differences between the EOP group and LOP group, while one-way ANOVA for differences among in non-peritonitis, EOP group and LOP groups. The Wilcoxon rank sum test for skewed continuous data and the Chi-square test or Fisher's exact test for categorical data. The Kaplan-Meier survival curves were drawn for each event of interest (technique survival and patient survival) and the log-rank test was used to compare curves. Univariate Cox proportional hazards regression was used to select significant factors associated with study outcomes. Variables whose $P < 0.10$ were selected for inclusion in the final multivariate Cox model. Multivariate logistic regression was calculated to select significant risk factors for EOP and the inclusion standard was also $P < 0.10$ . Collinearity of variables was tested. A two-tailed $P$ value $< 0.05$ was considered statistically significant. | 7    |
| 16                                                                            | <b>Results</b>      |     |                                                                                                                                                                                                                                                                                                                                                                                                                                                                                                                                                                                                                                                                                                                                                                                                                                                                                                                                                                                                                                                                                                                                                                                                                                                                                                                                             |      |
| 17<br>18<br>19<br>20<br>21<br>22<br>23                                        | Participants        | 13* | The first episode of peritonitis was experienced by 74 (20.7%) patients within 6 months after the start of PD. 11 (11/61) in Shanghai East Hospital, 22 (22/142) in Shanghai Songjiang District Central Hospital, 41 (41/154) in Baoshan branch of Shanghai First People's Hospital. There are 19 PD patients suffer the peritonitis within the first 3 months, 6 subjects died, 3 patients transferred to hemodialysis, 0 patients underwent renal transplantation, 10 patients continued peritoneal dialysis. While these 10 PD patients lacked of the information of peritoneal equilibration test.                                                                                                                                                                                                                                                                                                                                                                                                                                                                                                                                                                                                                                                                                                                                      | 8    |
| 24<br>25<br>26<br>27<br>28<br>29<br>30                                        | Descriptive data    | 14* | Median follow-up time for the 357 patients was 33.0 months (interquartile range 14.0-50.0 months). There were 211 males (59.1%) with an average age of $61.6 \pm 14.0$ years, and 145 females (40.9%) with an average age of $65.3 \pm 12.9$ years. The most common primary renal diseases were chronic glomerulonephritis (43.1%) and diabetic nephropathy (34.2%). Compared with the LOP patients, the EOP patient group had older ages, more female patients, higher Charlson comorbidity index (CCI) score and lower serum albumin levels, renal function and Kt/V at the time of initiation of PD and higher diabetes mellitus and peritonitis rates ( $P < 0.05$ ).                                                                                                                                                                                                                                                                                                                                                                                                                                                                                                                                                                                                                                                                   | 8    |
| 31<br>32<br>33<br>34<br>35                                                    | Outcome data        | 15* | Of the 357 patients, 74 (20.7%) patients developed their first episode of peritonitis within the first 6 months. Compared with the LOP group, the EOP group had older ages, more female patients, higher Charlson comorbidity index (CCI) score, lower serum albumin levels and renal function at the time of initiation of PD and higher diabetes mellitus and peritonitis rates ( $P < 0.05$ ). Staphylococcus was the most common Gram-positive organism in both EOP and LOP groups.                                                                                                                                                                                                                                                                                                                                                                                                                                                                                                                                                                                                                                                                                                                                                                                                                                                     | 8-9  |
| 36<br>37<br>38<br>39<br>40<br>41<br>42<br>43<br>44<br>45<br>46                | Main results        | 16  | The multivariate logistic regression analysis showed that factors associated with EOP included a higher CCI score (odds ratio (OR) 1.285, $P = 0.011$ ), lower serum albumin level (OR 0.924, $P = 0.016$ ) and lower Kt/V (OR 0.600, $P = 0.018$ ) at start of PD. In the Cox proportional hazards model, EOP was more likely a predictor of technique failure (hazard ratio (HR) 1.801, $P = 0.051$ ). There was no difference between EOP and LOP for all-cause mortality.                                                                                                                                                                                                                                                                                                                                                                                                                                                                                                                                                                                                                                                                                                                                                                                                                                                               | 9-10 |

|                          |    |                                                                                                                                                                                                                                                                                                                                                                                                                                                                                                                                                                                                                                                                                                                                                                                                                                                                                                   |    |
|--------------------------|----|---------------------------------------------------------------------------------------------------------------------------------------------------------------------------------------------------------------------------------------------------------------------------------------------------------------------------------------------------------------------------------------------------------------------------------------------------------------------------------------------------------------------------------------------------------------------------------------------------------------------------------------------------------------------------------------------------------------------------------------------------------------------------------------------------------------------------------------------------------------------------------------------------|----|
|                          |    |                                                                                                                                                                                                                                                                                                                                                                                                                                                                                                                                                                                                                                                                                                                                                                                                                                                                                                   |    |
| Other analyses           | 17 | EOP was defined as the first episode of peritonitis occurring within 3 months. After univariate and multivariate Cox analysis for technique failure and patient mortality, EOP was significantly associated with mortality compared with the LOP group, with a hazard ratio (HR) of 5.131 (Supplemental table1, $P<0.001$ ). Kaplan-Meier analysis showed that compared with LOP group, patient survival (Log rank 11.211, $P=0.001$ , Supplemental Fig.2) was lower in the EOP group. As for technique survival, there was no significant difference between EOP and LOP group (Log rank 0.179, $P=0.672$ , Supplemental Fig.1). We constructed the univariate and multiple logistic regression model using variables including gender, age, CCI score, diabetes, serum albumin, eGFR. We found that lower eGFR at the start of PD is an independent risk factor for EOP (Supplemental table 2). |    |
| <b>Discussion</b>        |    |                                                                                                                                                                                                                                                                                                                                                                                                                                                                                                                                                                                                                                                                                                                                                                                                                                                                                                   |    |
| Key results              | 18 | A higher CCI score and lower serum albumin level and Kt/V at PD initiation were significantly associated with EOP. EOP also predicted a high peritonitis rate and poor clinical outcomes.                                                                                                                                                                                                                                                                                                                                                                                                                                                                                                                                                                                                                                                                                                         | 10 |
| <b>Limitations</b>       |    |                                                                                                                                                                                                                                                                                                                                                                                                                                                                                                                                                                                                                                                                                                                                                                                                                                                                                                   |    |
| Interpretation           | 20 | This was a retrospective cohort study, lacking of some objective information such as education level, economic development and living standard, which may cause bias. Second, although this was a multicenter study, the sample size was relatively small. Further larger size and prospective investigation are necessary.                                                                                                                                                                                                                                                                                                                                                                                                                                                                                                                                                                       | 14 |
| Generalisability         | 21 | There is a strict exclusion criteria based on PD histories. We conducted a multi-center study which ensured sufficient power in obtaining the risk factors of EOP.                                                                                                                                                                                                                                                                                                                                                                                                                                                                                                                                                                                                                                                                                                                                | 14 |
| <b>Other information</b> |    |                                                                                                                                                                                                                                                                                                                                                                                                                                                                                                                                                                                                                                                                                                                                                                                                                                                                                                   |    |
| Funding                  | 22 | This study was supported by the National Nature Science Foundation of China grants (81670690, 81470991 and 81200492 to N.L., 81270778, 81470920, 81670623 and 81830021 to S.Z.), the Key Discipline Construction Project of Pudong Health Bureau of Shanghai (PWZxk2017-05 to N.L.), the Science Technology grant of Jiangxi Province Municipal Health Commission (20184077 to L.F.), the Branch grant of National key grants of Ministry of Science and Technology (2018YFA0108802 to S.Z.), the US National Institutes of Health (2R01DK08506505A1 to S.Z.), the Shanghai Scientific Committee of China (13PJ1406900 to N.L.).                                                                                                                                                                                                                                                                  | 15 |

\*Give information separately for cases and controls in case-control studies and, if applicable, for exposed and unexposed groups in cohort and cross-sectional studies.

**Note:** An Explanation and Elaboration article discusses each checklist item and gives methodological background and published examples of transparent reporting. The STROBE checklist is best used in conjunction with this article (freely available on the Web sites of PLoS Medicine at <http://www.plosmedicine.org/>, Annals of Internal Medicine at <http://www.annals.org/>, and Epidemiology at <http://www.epidem.com/>). Information on the STROBE Initiative is available at [www.strobe-statement.org](http://www.strobe-statement.org).

# BMJ Open

## The analysis of risk factors and outcome in peritoneal dialysis patients with early-onset peritonitis: a multi-center, retrospective, cohort study.

|                                 |                                                                                                                                                                                                                                                                                                                                                                                                                                                                                                                                                                                                                                                                                                                                                                                                                                                                                                                                  |
|---------------------------------|----------------------------------------------------------------------------------------------------------------------------------------------------------------------------------------------------------------------------------------------------------------------------------------------------------------------------------------------------------------------------------------------------------------------------------------------------------------------------------------------------------------------------------------------------------------------------------------------------------------------------------------------------------------------------------------------------------------------------------------------------------------------------------------------------------------------------------------------------------------------------------------------------------------------------------|
| Journal:                        | <i>BMJ Open</i>                                                                                                                                                                                                                                                                                                                                                                                                                                                                                                                                                                                                                                                                                                                                                                                                                                                                                                                  |
| Manuscript ID                   | bmjopen-2019-029949.R3                                                                                                                                                                                                                                                                                                                                                                                                                                                                                                                                                                                                                                                                                                                                                                                                                                                                                                           |
| Article Type:                   | Original research                                                                                                                                                                                                                                                                                                                                                                                                                                                                                                                                                                                                                                                                                                                                                                                                                                                                                                                |
| Date Submitted by the Author:   | 13-Oct-2019                                                                                                                                                                                                                                                                                                                                                                                                                                                                                                                                                                                                                                                                                                                                                                                                                                                                                                                      |
| Complete List of Authors:       | Ma, Xiaoyan; Shanghai East Hospital, Department of Nephrology<br>Shi, Yingfeng; Shanghai East Hospital, Department of Nephrology<br>Tao, Min; Shanghai East Hospital, Department of Nephrology<br>Jiang, Xiaolu; Shanghai East Hospital, Department of Nephrology<br>Wang, Yi; Shanghai East Hospital, Department of Nephrology<br>Zang, Xiujuan; Department of Nephrology, Shanghai Songjiang District Central Hospital<br>Fang, Lu; Shanghai East Hospital, Department of Nephrology<br>Jiang, Wei; Shanghai East Hospital, Department of Nephrology<br>Du, Lin; Shanghai East Hospital, Department of Nephrology<br>Jin, Dewei; Shanghai East Hospital, Department of Nephrology<br>Zhuang, Shougang; Shanghai East Hospital, Department of Nephrology;<br>Rhode Island Hospital, Department of Medicine<br>Liu, Na; Department of Nephrology, Shanghai East Hospital, Tongji University School of Medicine, Shanghai, China, |
| <b>Primary Subject Heading</b>: | Renal medicine                                                                                                                                                                                                                                                                                                                                                                                                                                                                                                                                                                                                                                                                                                                                                                                                                                                                                                                   |
| Secondary Subject Heading:      | Patient-centred medicine                                                                                                                                                                                                                                                                                                                                                                                                                                                                                                                                                                                                                                                                                                                                                                                                                                                                                                         |
| Keywords:                       | Peritoneal dialysis, Early-onset peritonitis, Risk factors, Outcomes                                                                                                                                                                                                                                                                                                                                                                                                                                                                                                                                                                                                                                                                                                                                                                                                                                                             |
|                                 |                                                                                                                                                                                                                                                                                                                                                                                                                                                                                                                                                                                                                                                                                                                                                                                                                                                                                                                                  |

SCHOLARONE™  
Manuscripts



I, the Submitting Author has the right to grant and does grant on behalf of all authors of the Work (as defined in the below author licence), an exclusive licence and/or a non-exclusive licence for contributions from authors who are: i) UK Crown employees; ii) where BMJ has agreed a CC-BY licence shall apply, and/or iii) in accordance with the terms applicable for US Federal Government officers or employees acting as part of their official duties; on a worldwide, perpetual, irrevocable, royalty-free basis to BMJ Publishing Group Ltd ("BMJ") its licensees and where the relevant Journal is co-owned by BMJ to the co-owners of the Journal, to publish the Work in this journal and any other BMJ products and to exploit all rights, as set out in our [licence](#).

The Submitting Author accepts and understands that any supply made under these terms is made by BMJ to the Submitting Author unless you are acting as an employee on behalf of your employer or a postgraduate student of an affiliated institution which is paying any applicable article publishing charge ("APC") for Open Access articles. Where the Submitting Author wishes to make the Work available on an Open Access basis (and intends to pay the relevant APC), the terms of reuse of such Open Access shall be governed by a Creative Commons licence – details of these licences and which [Creative Commons](#) licence will apply to this Work are set out in our licence referred to above.

Other than as permitted in any relevant BMJ Author's Self Archiving Policies, I confirm this Work has not been accepted for publication elsewhere, is not being considered for publication elsewhere and does not duplicate material already published. I confirm all authors consent to publication of this Work and authorise the granting of this licence.



1  
2  
3  
4 1 **The analysis of risk factors and outcome in peritoneal dialysis patients with**  
5  
6 2 **early-onset peritonitis: a multi-center, retrospective, cohort study.**

7  
8 3 Xiaoyan Ma<sup>1\*</sup>, Yingfeng Shi<sup>1\*</sup>, Min Tao<sup>1\*</sup>, Xiaolu Jiang<sup>1\*</sup>, Yi Wang<sup>1</sup>, Xiujuan Zang<sup>2</sup>,  
9  
10 4 Lu Fang<sup>1</sup>, Wei Jiang<sup>1</sup>, Lin Du<sup>1</sup>, Dewei Jin<sup>1</sup>, Shougang Zhuang<sup>1,3</sup>, Na Liu<sup>1</sup>

11 5

12 6

13  
14  
15  
16 7 <sup>1</sup>Department of Nephrology, Shanghai East Hospital, Tongji University School of  
17  
18 8 Medicine, Shanghai, China; <sup>2</sup>Department of Nephrology, Shanghai Songjiang District  
19  
20 9 Central Hospital, Shanghai, China; <sup>3</sup>Department of Medicine, Rhode Island Hospital  
21  
22 10 and Brown University School of Medicine, Providence, RI, USA

23  
24 11

25  
26 12 \*These authors make an equal contribution to this study.

27  
28 13

29  
30 14 **Corresponding author: Na Liu**, M.D., Ph.D., Department of Nephrology,  
31  
32 15 Shanghai East Hospital, Tongji University School of Medicine, 150 Jimo road,  
33  
34 16 Pudong new district, Shanghai 200120, China. **E-mail:** naliubrown@163.com.

35  
36 17

37  
38 18

39  
40 19

41  
42 20

43  
44 21

45  
46 22

47  
48 23

49  
50 24

51  
52 25

53  
54 26

55  
56 27

57  
58 28

59  
60

1  
2  
3  
4 29 **ABSTRACT**

5 30 **Objectives** To investigate the risk factors associated with early-onset peritonitis  
6  
7  
8 31 (EOP) and its influence on patients' technique survival and mortality.

9  
10 32 **Study design** Retrospective, cohort study.

11  
12 33 **Setting** Three peritoneal dialysis units in Shanghai.

13  
14 34 **Participants** PD patients from June 1, 2006, to May 1, 2018, were recruited and  
15  
16 35 followed up until December 31, 2018. According to time-to-first episode of  
17  
18 36 peritonitis, patients were divided into non-peritonitis (n=144), early-onset peritonitis  
19  
20 37 ( $\leq 6$  months, n=74) and late-onset peritonitis (LOP) ( $> 6$  months, n=139).

21  
22 38 **Primary and secondary outcome measures** EOP was defined as the first episode of  
23  
24 39 peritonitis occurring within 6 months after the initiation of peritoneal dialysis (PD).  
25  
26 40 The outcomes were all-cause mortality and technique failure.

27  
28 41 **Results** Of the 357 patients, 74 (20.7%) patients developed their first episode of  
29  
30 42 peritonitis within the first 6 months. Compared with the LOP group, the EOP group  
31  
32 43 had older ages, more female patients, higher Charlson comorbidity index (CCI) score,  
33  
34 44 lower serum albumin levels and renal function at the time of initiation of PD and  
35  
36 45 higher diabetes mellitus and peritonitis rates ( $P<0.05$ ). Staphylococcus was the most  
37  
38 46 common Gram-positive organism in both EOP and LOP groups. The multivariate  
39  
40 47 logistic regression analysis showed that factors associated with EOP included a higher  
41  
42 48 CCI score (odds ratio (OR) 1.285,  $P=0.011$ ), lower serum albumin level (OR 0.924,  
43  
44 49  $P=0.016$ ) and lower Kt/V (OR 0.600,  $P=0.018$ ) at start of PD. In the Cox proportional  
45  
46 50 hazards model, EOP was more likely a predictor of technique failure (hazard ratio  
47  
48 51 (HR) 1.801,  $P=0.051$ ). There was no difference between EOP and LOP for all-cause  
49  
50 52 mortality.

51  
52 53 **Conclusion** A higher CCI score and lower serum albumin level and Kt/V at PD  
53  
54 54 initiation were significantly associated with EOP. EOP also predicted a high  
55  
56 55 peritonitis rate and poor clinical outcome.

57  
58  
59 56  
60

1  
2  
3  
4 57 **KEY WORDS** Peritoneal dialysis; Early-onset peritonitis; Risk factors; Outcomes.  
5  
6

7  
8 58

9  
10 59 **ARTICLE SUMMARY**

11 60 **Strengths and limitations of this study**

- 12 61 1. There is a strict exclusion criteria based on PD histories.  
13  
14 62 2. We conducted a multi-center study which ensured sufficient power in obtaining  
15  
16 63 the risk factors of EOP.  
17  
18 64 3. This was a retrospective cohort study, lacking of some objective information such  
19  
20 65 as education level, economic development and living standard, which may cause  
21  
22 66 bias.  
23  
24 67 4. Our study was lack of the adjustment of different center factors (education,  
25  
26 68 re-training and home visit) in the multivariate analysis.  
27  
28 69 5. Although this was a multicenter study, the sample size was relatively small.  
29

30 70

31  
32 71 **INTRODUCTION**

33  
34 72 In developing countries, the number of peritoneal dialysis (PD) patients has been  
35  
36 73 increasing over time.<sup>1 2</sup> Peritoneal dialysis (PD)-related peritonitis is a serious  
37  
38 74 complication during PD therapy and remains the major reason for technique failure.<sup>3</sup>  
39  
40 75 Severe and prolonged peritonitis leads to structural and functional alterations of the  
41  
42 76 peritoneal membrane, eventually leading to peritoneal fibrosis.<sup>4</sup> Therefore,  
43  
44 77 identification of the risk factors for peritonitis in the early stage of PD would help to  
45  
46 78 reduce technique failures and mortality of PD.

47  
48 79 The definition of early-onset peritonitis varies widely between studies, which  
49  
50 80 generally refers to peritoneal dialysis related peritonitis occurring within 3-24 months  
51  
52 81 after surgical catheterization.<sup>5-8</sup> Previous studies showed that the first episode of  
53  
54 82 peritonitis in PD patients could significantly affect the prognosis of end-stage renal  
55  
56 83 disease (ESRD) patients.<sup>9</sup> However, few studies have specifically examined the risk  
57  
58 84 factors for peritonitis in the early period of PD. And most of these were observational  
59  
60

1  
2  
3  
4 85 cohort studies carried out in single center,<sup>5 10 11</sup> limiting the generalizability of their  
5  
6 86 observed outcomes. To determine the risk factors for early-onset peritonitis in  
7  
8 87 Chinese CKD patients and its influence on patients' technique survival and mortality,  
9  
10 88 we conducted this multiple-center, retrospective cohort study.

11 89

## 13 90 **METHODS**

### 15 91 **Study Population**

17 92 This was a multi-center retrospective cohort study included 357 patients with ESRD  
18  
19 93 who underwent PD in the Department of Nephrology in Baoshan branch of Shanghai  
20  
21 94 First People's Hospital, Shanghai Songjiang District Central Hospital and Shanghai  
22  
23 95 East Hospital, Tongji University School of Medicine. All incident PD patients from  
24  
25 96 June 1, 2006, to May 1, 2018, were recruited and followed up until December 31,  
26  
27 97 2018. This study was conducted according to the guidelines of the Helsinki  
28  
29 98 Declaration. The human research ethics committees approved this study and agreed to  
30  
31 99 collect the information from the hospital databases. They waived the need for  
32  
33  
34 100 participant consent (The human research ethics committees included the Human  
35  
36 101 Research Ethics Committee of Shanghai East Hospital Affiliated to Tongji University  
37  
38 102 School of Medicine, Human Research Ethics Committee of Shanghai Songjiang  
39  
40 103 District Central Hospital and the Human Research Ethics Committee of Baoshan  
41  
42 104 Branch of Shanghai First People's Hospital). The exclusion criteria were as follows:  
43  
44 105 patients who had been using PD for fewer than 90 days, patients with an age younger  
45  
46 106 than 18 years and patients who initiated PD in other PD centers and previously  
47  
48 107 accepted HD or kidney transplantation. There are 19 PD patients who suffered the  
49  
50 108 peritonitis within the first 3 months, 6 subjects died, 3 patients transferred to  
51  
52 109 hemodialysis, 0 patients underwent renal transplantation, 10 patients continued  
53  
54 110 peritoneal dialysis. While these 10 PD patients were lack of the information of  
55  
56 111 peritoneal equilibration test. Patients were followed until any of the following events:  
57  
58 112 death, a change to HD, renal transplantation or until December 31, 2018. According  
59  
60 113 to the Chinese Peritoneal Dialysis Guideline, we adopted standardized surgical

1  
2  
3  
4 114 catheterization technique.<sup>12</sup> We chose Tenckhoff silicone tube with double polyester  
5  
6 115 sleeve. Double-purse string suture or double-layer suture was adopted to fix the  
7  
8 116 catheter. Fine needle and thick line were used to prevent peripheral tube leakage. The  
9  
10 117 exit direction of catheter tunnel was downward and outward, and the outer polyester  
11  
12 118 sleeve was 2 to 3 cm away from the exit. All the surgical operations are performed in  
13  
14 119 the operating room. The single dose intravenous antibiotic 30 minutes before surgery  
15  
16 120 is recommended to prevent infection.<sup>13</sup> The first or second generation cephalosporin  
17  
18 121 is suggested.<sup>13 14</sup> According to the ISPD peritonitis recommendations,<sup>13-15</sup> we daily  
19  
20 122 and topically applied mupirocin ointment to the catheter exit site to prevent exit site  
21  
22 123 infection. Patients initiated PD by Dianeal with 1.5% or 2.5% dextrose (Baxter  
23  
24 124 Healthcare, Guangzhou, China). Dialysate concentration was 1.5% dextrose and  
25  
26 125 replaced every four hours during the day, while 2.5% at night and kept in the body. A  
27  
28 126 total of 213 patients who had at least one episode of peritonitis. According to  
29  
30 127 time-to-first episode of peritonitis, patients were divided into non-peritonitis (n=144),  
31  
32 128 early-onset peritonitis ( $\leq 6$  months, n=74) and late-onset peritonitis ( $> 6$  months,  
33  
34 129 n=139). We collected baseline characteristics within 1-3 months from the start of PD,  
35  
36 130 including demographic data (age, gender, smoking, drinking, CCI, BMI), medical  
37  
38 131 history, drug-taking history, biochemical data (hemoglobin, serum electrolyte, fasting  
39  
40 132 blood glucose, total cholesterol, total triglyceride, high-density lipoprotein  
41  
42 133 cholesterol, low-density lipoprotein cholesterol, and serum albumin, uric acid,  
43  
44 134 creatinine, blood urea nitrogen, estimated glomerular filtration rate (eGFR), the  
45  
46 135 clearance rate of urea nitrogen (Kt/V), causes of ESRD, peritonitis episodes.  
47  
48 136 Peritoneal fluid effluent from patients with peritonitis was collected and cultured for 1  
49  
50 137 to 5 days to identify the bacterial flora in the dialysate.

51  
52 138

### 53 54 139 **Primary and secondary outcome measures**

55  
56 140 Early-onset peritonitis was defined as the first episode of peritonitis occurring within  
57  
58 141 6 months after the initiation of peritoneal dialysis. This definition is consistent with  
59  
60

1  
2  
3  
4 142 other published article.<sup>8 16</sup> The outcomes were all-cause mortality and technique  
5 143 failure.

6  
7  
8 144

9  
10 145 **Study definitions**

11 146 Diagnostic criteria for peritonitis are based on the 2010 International Society for  
12 Peritoneal Dialysis (ISPD) guidelines.<sup>15</sup> Patients diagnosed as peritonitis should meet  
13 147 at least two of the following three standards: (1) Clinical symptoms or signs of  
14 148 peritonitis; (2) Leucocyte count (at least 100/mm<sup>3</sup>) and polymorphonuclear  
15 149 neutrophilic cells proportion (at least 50%) in peritoneal fluid effluent; (3) Related  
16 150 pathogens in smear or culture of peritoneal fluid. Early-onset peritonitis was defined  
17 151 as the first episode of peritonitis occurring within 6 months after the initiation of PD.

18 152 The outcomes were all-cause mortality and technique failure. Death was an end-point  
19 153 event in the patient survival analysis. Relapse was defined as an episode occurring  
20 154 within 4 weeks of completion of therapy of a prior episode with the same organism,<sup>13</sup>  
21 155 recurrence referred to an episode occurring within 4 weeks of completion of therapy  
22 156 of a prior episode but with a different organism.<sup>13</sup> Instead of transfer to HD therapy  
23 157 permanently, patients with both relapse and recurrence were treated by antibiotics and  
24 158 continued PD treatment. Complete cure was defined as the resolution of peritonitis  
25 159 without relapse or recurrence by antibiotics alone.<sup>7</sup> However, some of refractory  
26 160 peritonitis failed to clear up effluent after 5 days of appropriate antibiotics. This  
27 161 population of patients was transferred to HD permanently. We classified this  
28 162 population of patients into “transfer to hemodialysis”. Other population of patients  
29 163 who were transferred to HD were due to the serious tunnel infection with peritonitis  
30 164 and ultrafiltration failure induced by encapsulating peritoneal sclerosis. Patients who  
31 165 transferred to HD were censored from the patient survival analysis, and death was  
32 166 censored for technique failure. Technique failure was defined as the transfer to HD  
33 167 therapy permanently (lasted for 30 days or more) due to ultrafiltration failure,  
34 168 peritonitis, exit-site infection and other operational problems.<sup>17</sup>  
35  
36  
37  
38  
39  
40  
41  
42  
43  
44  
45  
46  
47  
48  
49  
50  
51  
52  
53  
54  
55  
56  
57  
58  
59  
60

1  
2  
3  
4 170

5  
6 171 **Patient and public involvement**

7  
8 172 No patient was involved in the design or conduct of the study, but the results of the  
9  
10 173 study will be shared to patients coming for follow-up.

11  
12 174

13  
14 175 **Statistical analysis**

15  
16 176 All statistical analyses were performed by using SPSS 20.0 for Windows (IBM Corp.,  
17  
18 177 Armonk, NY, USA). The normal distributed data were showed as mean±standard  
19  
20 178 deviation (SD) and the skewed data were showed as median values with the 25th to  
21  
22 179 75th percentile intervals. Categorical data were expressed as frequency (n) and  
23  
24 180 percentage (%). As for normally distributed data, student's t-test is used for analyzing  
25  
26 181 the differences between the EOP group and LOP group, while one-way ANOVA for  
27  
28 182 differences among in non-peritonitis, EOP group and LOP groups. The Wilcoxon  
29  
30 183 rank sum test for skewed continuous data and the Chi-square test or Fisher's exact test  
31  
32 184 for categorical data. The Kaplan-Meier survival curves were drawn for each event of  
33  
34 185 interest (technique survival and patient survival) and the log-rank test was used to  
35  
36 186 compare curves. Univariate Cox proportional hazards regression was used to select  
37  
38 187 significant factors associated with study outcomes. Variables with  $P<0.10$  were  
39  
40 188 selected for inclusion in the final multivariate Cox model. Multivariate logistic  
41  
42 189 regression was calculated to select significant risk factors for EOP and the inclusion  
43  
44 190 standard was also  $P<0.10$ . Collinearity of variables was tested. A two-tailed  $P$  value  
45  
46 191  $<0.05$  was considered statistically significant.

47  
48  
49 192

50 193 **RESULTS**

51  
52 194 **Patient characteristics**

53  
54 195 A total of 357 patients with ESRD underwent CAPD in three dialysis centers in  
55  
56 196 Shanghai during the study period. All patients used Dianeal with 1.5% or 2.5%  
57  
58 197 dextrose. The first episode of peritonitis was experienced by 74 (20.7%) patients  
59  
60

1  
2  
3  
4 198 within 6 months after the start of PD. 11 (11/61) in Shanghai East Hospital, 22  
5  
6 199 (22/142) in Shanghai Songjiang District Central Hospital, 41 (41/154) in Baoshan  
7  
8 200 branch of Shanghai First People's Hospital. Median follow-up time for the 357  
9  
10 201 patients was 33.0 months (interquartile range 14.0-50.0 months). There were 211  
11  
12 202 males (59.1%) with an average age of  $61.6 \pm 14.0$  years, and 145 females (40.9%)  
13  
14 203 with an average age of  $65.3 \pm 12.9$  years. The most common primary renal diseases  
15  
16 204 were chronic glomerulonephritis (43.1%) and diabetic nephropathy (34.2%).  
17  
18 205 Compared with the LOP patients, the EOP patient group had older ages, more female  
19  
20 206 patients, higher Charlson comorbidity index (CCI) score and lower serum albumin  
21  
22 207 levels, renal function and Kt/V at PD initiation and higher diabetes mellitus ( $P<0.05$ ).  
23  
24 208 The percentage of patients experienced more than 3 peritonitis episodes in EOP group  
25  
26 209 (55.4%) is higher than LOP group (33.8%). Additional demographic and laboratory  
27  
28 210 characteristics of the study population are presented in Table 1.

29  
30 211

### 31 32 212 **Causative organisms**

33  
34 213 In table 2, among 213 patients with peritonitis, 47 (22.1%) were due to Gram-positive  
35  
36 214 organisms, 24 (11.3%) were due to Gram-negative organisms, 6 (2.8%) were due to  
37  
38 215 fungi, 1 (0.4%) were due to multiple organisms, and 135 (63.4%) were  
39  
40 216 culture-negative. Staphylococcus was the most common Gram-positive organism in  
41  
42 217 both groups. Compared with the EOP patient group, the LOP patient group had more  
43  
44 218 culture-negative peritonitis (89.2% vs. 14.9%,  $P<0.001$ ). The incidences of  
45  
46 219 culture-negative peritonitis were 37.1% (13/35) in Shanghai East Hospital, 71.7%  
47  
48 220 (38/53) in Shanghai Songjiang District Central Hospital, 67.2% (84/125) in Baoshan  
49  
50 221 branch of Shanghai First People's Hospital ( $P=0.002$ ).

51  
52 222

### 53 54 223 **Outcomes**

55  
56 224 The total peritonitis rate (in a population included EOP group, LOP group and  
57  
58 225 peritonitis-free group) was 0.490 episodes per patient-year (213 patients presented  
59  
60



1  
2  
3  
4 226 509 episodes of peritonitis during 1039.58 patient-years of follow-up). The peritonitis  
5  
6 227 rate (in a population included EOP group and LOP group) was 0.660 episodes per  
7  
8 228 patient-year (213 patients presented 509 episodes of peritonitis during 771.33  
9  
10 229 patient-years of follow-up). The peritonitis rate in EOP group was 0.960 episodes per  
11  
12 230 patient-year (74 patients presented 209 episodes of peritonitis during 217.75  
13  
14 231 patient-years of follow-up). The peritonitis rate in LOP group was 0.542 episodes per  
15  
16 232 patient-year (139 patients presented 300 episodes of peritonitis during 553.58  
17  
18 233 patient-years of follow-up). The peritonitis rates in Shanghai East Hospital, Shanghai  
19  
20 234 Songjiang District Central Hospital and Baoshan Branch of Shanghai First People's  
21  
22 235 Hospital were 0.41, 0.31 and 0.61 episodes per patient-year respectively. Early-onset  
23  
24 236 first episode of peritonitis had a lower cure rate (17.6% vs 33.8%, Table 2.), higher  
25  
26 237 rate of transferring to hemodialysis (27.0% vs 19.4%, Table 2.), and higher mortality  
27  
28 238 (21.6% vs 14.4%, Table 2.) compared to late-onset first episode of peritonitis.

29  
30 239

#### 31 32 240 **Technique failure**

33  
34 241 The variables including time to first peritonitis (EOP vs. LOP), age, sex, smoking,  
35  
36 242 drinking, CCI, BMI, hemoglobin, total cholesterol, total triglyceride, serum albumin,  
37  
38 243 total Kt/V and diabetes were calculated into the cox proportional hazards model for  
39  
40 244 technique failure. And we found that EOP was associated with technique failure  
41  
42 245 compared with the LOP group, with a hazard ratio (HR) of 1.801 (Table 3,  $P=0.051$ ).  
43  
44 246 Kaplan-Meier analysis showed that compared with LOP group, technique survival  
45  
46 247 was lower in the EOP group (Log rank 3.943,  $P=0.047$ , Fig.1).

47  
48 248

#### 49 50 249 **All-cause mortality**

51  
52 250 During the study period, a total of 52 patients died: 16 patients in the EOP group and  
53  
54 251 20 patients in the LOP group. Variables with  $P$  value  $< 0.10$  in univariate Cox  
55  
56 252 regression analysis, including the time to first peritonitis (EOP vs. LOP), age, serum  
57  
58 253 albumin and total Kt/V, were chosen for further adjustment in multivariate Cox  
59  
60

1  
2  
3  
4 254 proportional hazards model. After adjustment, there was no significant difference  
5  
6 255 between the EOP and LOP groups (Table 3). Fig. 2 describes cumulative survival by  
7  
8 256 EOP and LOP groups using the Kaplan-Meier analysis. Compared with LOP group,  
9  
10 257 cumulative survival was lower in the EOP group (Log rank 4.060,  $P=0.044$ ).

11  
12 258

### 13 14 259 **Risk factors of early-onset peritonitis**

15  
16 260 Variables in Table 1 were tried in an univariate logistic regression model, and only  
17  
18 261 variables with  $P$  value  $< 0.10$  for peritonitis were depicted in Table 4. Based on the  
19  
20 262 simple logistic regression analysis of risk factors associated with EOP, we constructed  
21  
22 263 a multiple logistic regression model using variables including gender, age, CCI score,  
23  
24 264 diabetes, serum albumin and Kt/V. We found that higher CCI score (OR=1.285,  
25  
26 265 95%CI 1.058-1.561,  $P=0.011$ ), lower serum albumin level (OR=0.924, 95%CI  
27  
28 266 0.867-0.985,  $P=0.016$ ) and Kt/V (OR=0.600, 95%CI 0.394-0.915,  $P=0.018$ ) at the  
29  
30 267 start of PD, were significantly associated with EOP (Table 4).

31  
32 268

### 33 34 269 **DISCUSSION**

35  
36  
37 270 Our retrospective cohort study of 357 PD patients showed that 74 (20.7%) patients in  
38  
39 271 three Shanghai dialysis centers developed the first episodes of peritonitis within the  
40  
41 272 first 6 months. Higher CCI score, lower serum albumin level and Kt/V at the start of  
42  
43 273 PD, were significantly associated with EOP. In addition, an early peritonitis onset  
44  
45 274 predicted a high peritonitis rate and technique failure.

46  
47 275 Early-onset peritonitis is a major complication of peritoneal dialysis, directly or  
48  
49 276 indirectly causing the abandon of dialysis treatment. In this study, among 213 patients  
50  
51 277 with peritonitis, 47 (22.1%) were due to Gram-positive organisms, 24 (11.3%) were  
52  
53 278 due to Gram-negative organisms, 6 (2.8%) were due to fungi. Staphylococcus was the  
54  
55 279 most common Gram-positive organism in both early-onset and late-onset peritonitis.  
56  
57 280 This bacterial flora distribution and high incidence of staphylococcus were similar to  
58  
59 281 previous reports.<sup>18-20</sup> Fungal peritonitis was rare in PD patients, but could bring out  
60

1  
2  
3  
4 282 irreversible peritoneal damage.<sup>21</sup> Recent clinical studies confirmed that the incidence  
5  
6 283 of fungal peritonitis was only 3%-6%,<sup>21</sup> while the relative mortality rate was up to  
7  
8 284 20%-30%.<sup>22</sup> The culture-negative proportion for the first peritonitis episode was high  
9  
10 285 in the LOP patients (89.2%). And the incidences of culture-negative peritonitis were  
11  
12 286 37.1% (13/35) in Shanghai East Hospital, 71.7% (38/53) in Shanghai Songjiang  
13  
14 287 District Central Hospital, 67.2% (84/125) in Baoshan branch of Shanghai First  
15  
16 288 People's Hospital ( $P=0.002$ ). The high culture-negative proportion may primarily  
17  
18 289 attribute to early antibiotic treatment and limited effluent culture technique in  
19  
20 290 small-scale PD units. Before 2014, the technology of blood culture for PD effluent  
21  
22 291 has not been widely adopted by small-scale district hospitals in Shanghai. In the  
23  
24 292 district PD units, dialysate was inoculated onto solid medium and then incubated only  
25  
26 293 in aerobic environment. It accounted for about 60% of culture-negative peritonitis  
27  
28 294 patients in this investigation. Since 2015, all these three units in Shanghai chose  
29  
30 295 blood-culture bottle for the preferred technique to culture microorganism in PD  
31  
32 296 effluent. Lacking centrifugation of PD effluent and recent antibiotic usage may be the  
33  
34 297 major reasons for the rest of 40% negative effluent cultures in this investigation. In  
35  
36 298 addition, culture negative peritonitis was higher in LOP than EOP group in the same  
37  
38 299 study period, because LOP patients underwent dialysis more than 6 months and had  
39  
40 300 more experience in peritoneal dialysis. In the early stage of peritonitis, some of  
41  
42 301 experienced PD patients might take dialysate to wash the peritoneum to relieve  
43  
44 302 abdominal pain. Diluted peritoneal fluid would result in a high negative rate of  
45  
46 303 peritoneal effluent culture. Considering the high culture negative rate in this study,  
47  
48 304 our three PD units will take a series of measures to improve our culture methods,  
49  
50 305 including centrifugation of PD effluent, incubation in aerobic, microaerophilic and  
51  
52 306 anaerobic environments, using antibiotic neutralization bottle and so on.<sup>13 14</sup>

54 307 By the end of the study, 509 episodes of peritonitis occurred in 213 patients, and  
55  
56 308 the peritonitis rate was 0.490 episodes per patient-year. The peritonitis rates in  
57  
58 309 Shanghai East Hospital, Shanghai Songjiang District Central Hospital and Baoshan  
59  
60

1  
2  
3  
4 310 Branch of Shanghai First People's Hospital were 0.41, 0.31 and 0.61 episodes per  
5  
6 311 patient-year respectively. Recently, some investigations from other areas of China  
7  
8 312 have indicated that the peritonitis rate was 0.196 episodes per patient-year in Taiwan  
9  
10 313 <sup>5</sup>, 0.158 episodes per patient-year in Guangzhou,<sup>7</sup> 0.296 episodes per patient-year in  
11  
12 314 Suzhou <sup>16</sup> and 0.158 per patient-year in Hangzhou <sup>8</sup>. Peritonitis rate in our study is  
13  
14 315 higher than the rest of China. Among the early-onset peritonitis patients who had  $\geq 3$   
15  
16 316 episodes of peritonitis, 25 patients from EOP group experienced recurrent peritonitis,  
17  
18 317 16 patients from EOP group experienced repeat peritonitis. 43.8% repeat patients  
19  
20 318 were staphylococcal peritonitis. And 75% EOP patients with  $\geq 3$  episodes of peritonitis  
21  
22 319 came from Baoshan Branch of Shanghai First People's Hospital. Most of them are  
23  
24 320 fishermen and live in the Chongming Island. Since the poorer economic abilities and  
25  
26 321 living conditions, they are easy to get malnutrition and suffer from peritonitis again. <sup>23</sup>  
27  
28 322 <sup>24</sup> And lacking of home visit by PD nurses makes it difficult to determine which  
29  
30 323 patients require PD re-training. Lacking of technical improvement in small-scale PD  
31  
32 324 units is also the important reason for high peritonitis rate.

34 325 The complete cure rate in our study was related low (EOP 17.6%, LOP 33.8%).  
35  
36 326 All the PD patients from these three centers received prophylactic intravenous  
37  
38 327 antibiotics prior to PD catheter insertion. However, most of antibiotics used are first  
39  
40 328 or second generation cephalosporin. They may not cover all the Gram-negative  
41  
42 329 organisms, thereby resulting in increased rate of relapse and recurrence. To address  
43  
44 330 this issue, we may have to modify our empirical antibiotic regimen by using more  
45  
46 331 effective antibiotics such as third generation cephalosporin, and applying  
47  
48 332 individualized treatment strategy. In addition, patients with poorer economic abilities  
49  
50 333 and living conditions are easy to suffer malnutrition and peritonitis again. <sup>23 24</sup> Finally,  
51  
52 334 the reason for the low cure rate in this study may also include a considerable number  
53  
54 335 of patients with hemodialysis due to other dialysis-related complications.

56 336 Our study indicated that lower serum albumin was one of the major risk factors  
57  
58 337 for early-onset peritonitis. Loss of protein would cause negative nitrogen balance and  
59  
60

1  
2  
3  
4 338 malnutrition, leading to a decline in immune function and increased susceptibility to  
5  
6 339 pathogenic microorganisms.<sup>25</sup> Malnutrition was one of the most common  
7  
8 340 complications in PD patients, and plasma albumin level was an important clinical  
9  
10 341 predictor. Hypoalbuminemia was proved to be related with malnutrition, protein  
11  
12 342 losses, and inflammation.<sup>26 27</sup> Wang Qin et al. discovered that patients with an initial  
13  
14 343 serum albumin level less than 2.9 g/dL had a higher incidence of peritonitis and  
15  
16 344 regarded hypoalbuminemia as an independent predictor for subsequent peritonitis at  
17  
18 345 the start of PD therapy.<sup>28</sup> Further studies demonstrated that low serum albumin level  
19  
20 346 increased all-cause, cardiovascular, and infection related mortality in both PD and HD  
21  
22 347 patients.<sup>29</sup> In addition to peritoneal infection, hypoalbuminemia was also found to be  
23  
24 348 associated with septicemia, pneumonia and other inflammatory responses.<sup>30-34</sup> In this  
25  
26 349 study, we reaffirmed that a low baseline serum albumin level is an independent risk  
27  
28 350 factors for EOP (OR=0.924, 95%CI 0.867-0.985, P=0.016).

30 351 Although older age is not an independent risk factor for EOP, baseline data  
31  
32 352 showed that patients in EOP group older than LOP group (65.87±13.20 vs.  
33  
34 353 61.40±13.53, P=0.022). It was reported that elder patients were more likely to  
35  
36 354 progress to a worse outcome, including HD, renal transplantation or death.<sup>35</sup>  
37  
38 355 Incidence of malnutrition in elderly PD patients was more common than young and  
39  
40 356 middle-aged patients. Together with cardiovascular diseases, cerebrovascular disease,  
41  
42 357 hearing and visual impairments, all of these factors increase and aggravate the episode  
43  
44 358 of peritonitis.<sup>36-38</sup> Malnutrition in elder not only affected the quality of dialysis  
45  
46 359 patients' life, but also was an important factor in comorbidity and mortality.<sup>39</sup> Other  
47  
48 360 elements that increased the peritonitis susceptibility in elderly patients included  
49  
50 361 generalized functional deterioration, weakened immune system,<sup>40</sup> combined chronic  
51  
52 362 diseases, bad eyesight, poor aseptic concept, lack of compliance and living alone.  
53  
54 363 Their atypical clinical symptoms of peritonitis could be regarded as another essential  
55  
56 364 reason. Up-regulated pain threshold, unobtrusive bellyache and mild subjective  
57  
58 365 symptoms might cover up early-onset peritonitis until the occurrence of liquid  
59  
60

1  
2  
3  
4 366 turbidity, which would delay the best time for treatment.

5 367 Comparison in biochemical indicators revealed that Kt/V and residual renal  
6  
7 368 function decreased significantly after early-onset peritonitis. Multivariate logistic  
8  
9 369 regression showed that a lower total Kt/V (OR=0.600, 95%CI 0.394-0.915, P=0.018)  
10  
11 370 at the start of PD was associated with EOP. These results suggest that early infection  
12  
13 371 with peritonitis might further worsen renal function, especially the scavenging  
14  
15 372 capacity of solutes by residual kidney. Early inflammatory response and renal  
16  
17 373 function damage might be the underlying causes of peritonitis. Some studies  
18  
19 374 suggested that the survival rate of PD patients depends more on residual renal  
20  
21 375 function than the peritoneal cleaning capacity.<sup>41-43</sup> Harris et al. further put forward  
22  
23 376 that residual renal function less than  $4 \text{ ml} \cdot \text{min}^{-1} \cdot 1.73\text{m}^{-2}$  was associated with high  
24  
25 377 mortality during peritoneal dialysis.<sup>44</sup> Therefore, we should pay close attention to the  
26  
27 378 change of residual renal function when monitoring the adequacy of dialysis.

28  
29 379 The relationship between peritonitis and technique failure and death have been  
30  
31 380 investigated in previous Chinese single-center studies.<sup>7 8</sup> A study in Chinese Zhejiang  
32  
33 381 province showed that, EOP was a significant predictor of all-cause mortality. As for  
34  
35 382 technique failure, they found no significant difference between EOP and LOP.<sup>8</sup>  
36  
37 383 However, a study in Chinese Guangzhou province indicated that technique failure in  
38  
39 384 EOP group was lower than LOP group, but patient survival did not differ between two  
40  
41 385 groups.<sup>7</sup> Our present study showed that EOP was more likely a predictor of technique  
42  
43 386 failure (HR=1.801, 95%CI 0.996-3.257, P=0.051). There was no difference between  
44  
45 387 EOP and LOP for all-cause mortality. These conclusions might be limited by regional  
46  
47 388 and demographic differences in different dialysis centers. However, all three studies  
48  
49 389 indicated that patients who experienced peritonitis early after the initiation of PD tend  
50  
51 390 to experience more episodes of peritonitis. Repeating peritonitis in EOP patients not  
52  
53 391 only injury membrane permeability and reduce ultrafiltration, but also increase severe  
54  
55 392 systemic inflammation, leading to worse clinical outcomes.<sup>45</sup> Thus, appropriately  
56  
57 393 dealing with the risk factors of early-onset peritonitis will be good to reduce infection  
58  
59  
60

1  
2  
3  
4 394 incidence, raise therapeutic effect of PD and improve patient's life quality and  
5  
6 395 prognosis.

7  
8 396 There are several limitations to this study. Firstly, this was a retrospective cohort  
9  
10 397 study, lacking of some objective information such as education level, economic  
11  
12 398 development and living standard, which may cause bias. Secondly, our study lacked  
13  
14 399 of the adjustment of different center factors (education, re-training and home visit) in  
15  
16 400 the multivariate analysis. Thirdly, although this was a multicenter study, the sample  
17  
18 401 size was relatively small. Further larger size and prospective investigation are  
19  
20 402 necessary.

21  
22 403

#### 23 24 404 **CONCLUSION**

25  
26 405 This retrospective cohort study found that a higher CCI score and lower serum  
27  
28 406 albumin and Kt/V at PD initiation were significantly associated with EOP. In  
29  
30 407 addition, an early peritonitis onset predicted a high peritonitis rate and worse clinical  
31  
32 408 outcomes. Understanding the risk factors for EOP will help to develop effective  
33  
34 409 measures to prevent or delay the complication of peritoneal dialysis as much as  
35  
36 410 possible.

37  
38 411

39  
40 412 **Acknowledgements** The authors appreciate all the participants and their families.  
41  
42 413 They also thank the members of the study team from Shanghai East Hospital  
43  
44 414 Affiliated to Tongji University School of Medicine, Shanghai Songjiang District  
45  
46 415 Central Hospital and Baoshan Branch of Shanghai First People's Hospital for their  
47  
48 416 assistance in completing this project.

49  
50 417

#### 51 52 418 **Author Contributors**

53  
54 419 X.M., Y.S. M.T. and X.J. contributed equally to this work. X.M., Y.S. M.T. and X.J.  
55  
56 420 performed the statistical analysis and wrote the manuscript; X.M., Y.S., M.T., X.J.,  
57  
58 421 Y.W., D.J., L.F., W.J., L.D. and X.Z. participated in the data collection; X.M., Y.S.,  
59  
60

1  
2  
3  
4 422 S.Z. and N.L. contributed to discussion; X.M., S.Z. and N.L. participated in the  
5  
6 423 design of the study and edited the manuscript. All authors contributed to data  
7  
8 424 interpretation and revisions of the manuscript critically for important intellectual  
9  
10 425 content. All authors approved the final version of the submitted manuscript and  
11  
12 426 agreed to be accountable for all aspects of the work in ensuring that questions related  
13  
14 427 to the accuracy or integrity of any part of work are appropriately investigated and  
15  
16 428 resolved.

17  
18 429

### 20 430 **Funding**

21  
22 431 This study was supported by the National Nature Science Foundation of China grants  
23  
24 432 (81670690, 81470991 and 81200492 to N.L., 81270778, 81470920, 81670623 and  
25  
26 433 81830021 to S.Z.), the Key Discipline Construction Project of Pudong Health Bureau  
27  
28 434 of Shanghai (PWZxk2017-05 to N.L.), the Science Technology grant of Jiangxi  
29  
30 435 Province Municipal Health Commission (20184077 to L.F.), the Branch grant of  
31  
32 436 National key grants of Ministry of Science and Technology (2018YFA0108802 to  
33  
34 437 S.Z.), the US National Institutes of Health (2R01DK08506505A1 to S.Z.), the  
35  
36 438 Shanghai Scientific Committee of China (13PJ1406900 to N.L.).

37  
38 439 **Competing interests** None declared.

39  
40 440

### 42 441 **Ethics approval and consent to participate**

43  
44 442 The study was conducted according to the guidelines of the Helsinki Declaration and  
45  
46 443 was approved by the Human Research Ethics Committee of Shanghai East Hospital  
47  
48 444 Affiliated to Tongji University School of Medicine, Human Research Ethics  
49  
50 445 Committee of Shanghai Songjiang District Central Hospital and the Human Research  
51  
52 446 Ethics Committee of Baoshan Branch of Shanghai First People's Hospital. The human  
53  
54 447 research ethics committees approved this study and agreed to collect the information  
55  
56 448 from the hospital databases. They waived the need for participant consent.

57  
58 449 **Provenance and peer review** Not commissioned; externally peer reviewed.  
59  
60



1  
2  
3  
4 450 **Data availability statement** The data sets generated and analyzed during the  
5  
6 451 current study are available from the corresponding author upon reasonable request.

7  
8 452 **Open Access** This is an Open Access article distributed in accordance with the  
9  
10 453 Creative Commons Attribution Non Commercial (CC BY-NC 4.0) license, which  
11  
12 454 permits others to distribute, remix, adapt, build upon this work non-commercially, and  
13  
14 455 license their derivative works on different terms, provided the original work is  
15  
16 456 properly cited and the use is non-commercial.

17  
18 457 See: <http://creativecommons.org/licenses/by-nc/4.0/>

19  
20 458 © Article author(s) (or their employer(s) unless otherwise stated in the text of the  
21  
22 459 article) 2018. All rights reserved. No commercial use is permitted unless otherwise  
23  
24 460 expressly granted.

25  
26 461

## 27 28 462 **REFERENCES**

- 29  
30 463 1. Li PK, Chow KM, Van de Luitgaarden MW, et al. Changes in the worldwide  
31  
32 464 epidemiology of peritoneal dialysis. *Nat Rev Nephrol* 2017;13:90-103.
- 33  
34 465 2. Jain AK, Blake P, Cordy P, et al. Global trends in rates of peritoneal dialysis. *J Am*  
35  
36 466 *Soc Nephrol* 2012;23:533-44.
- 37  
38 467 3. Cho Y, Johnson DW. Peritoneal dialysis-related peritonitis: towards improving  
39  
40 468 evidence, practices, and outcomes. *Am J Kidney Dis* 2014;64:278-89.
- 41  
42 469 4. Thirugnanasambathan T, Hawley CM, Badve SV, et al. Repeated peritoneal  
43  
44 470 dialysis-associated peritonitis: a multicenter registry study. *Am J Kidney Dis*  
45  
46 471 2012;59:84-91.
- 47  
48 472 5. Hsieh YP, Wang SC, Chang CC, et al. The negative impact of early peritonitis on  
49  
50 473 continuous ambulatory peritoneal dialysis patients. *Perit Dial Int* 2014;34:627-35.
- 51  
52 474 6. See EJ, Johnson DW, Hawley CM, et al. Early peritonitis and its outcome in  
53  
54 475 incident peritoneal dialysis patients. *Perit Dial Int* 2017.
- 55  
56 476 7. Wu H, Huang R, Yi C, et al. Risk factors for early-onset peritonitis in Southern  
57  
58 477 Chinese peritoneal dialysis patients. *Perit Dial Int* 2016;36:640-46.
- 59  
60

- 1  
2  
3  
4 478 8. Tian Y, Xie X, Xiang S, et al. Risk factors and outcomes of early-onset peritonitis  
5  
6 479 in Chinese peritoneal dialysis patients. *Kidney Blood Press Res* 2017;42:1266-76.
- 7  
8 480 9. Béchade C, Guittet L, Evans D, et al. Early failure in patients starting peritoneal  
9  
10 481 dialysis: a competing risks approach. *Nephrol Dial Transplant* 2014;29:2127-35.
- 11  
12 482 10. Feng S, Wang Y, Qiu B, et al. Impact of early-onset peritonitis on mortality and  
13  
14 483 technique survival in peritoneal dialysis patients. *Springerplus* 2016;5:1676.
- 15  
16 484 11. Fourtounas C, Savidaki E, Dousdabanis P, et al. Peritonitis during the first year  
17  
18 485 after commencement of peritoneal dialysis has an impact on technique survival  
19  
20 486 and patient morbidity. *Adv Perit Dial* 2006;22:50-4.
- 21  
22 487 12. Catheterization CEGoPD. Chinese guidelines for peritoneal dialysis  
23  
24 488 catheterization. *Chinese J Nephrol* 2016;32:867-71.
- 25  
26 489 13. Li PK, Szeto CC, Piraino B, et al. ISPD peritonitis recommendations: 2016 update  
27  
28 490 on prevention and treatment. *Perit Dial Int* 2016;36:481-508.
- 29  
30 491 14. Szeto CC, Li PK, Johnson DW, et al. ISPD catheter-related infection  
31  
32 492 recommendations: 2017 Update. *Perit Dial Int* 2017;37:141-54.
- 33  
34 493 15. Li PK, Szeto CC, Piraino B, et al. Peritoneal dialysis-related infections  
35  
36 494 recommendations: 2010 update. *Perit Dial Int* 2010;30:393-423.
- 37  
38 495 16. Wang Z, Jiang L, Feng S, et al. Early peritonitis is an independent risk factor for  
39  
40 496 mortality in elderly peritoneal dialysis patients. *Kidney Blood Press Res*  
41  
42 497 2015;40:298-305.
- 43  
44 498 17. Shen JI, Mitani AA, Saxena AB, et al. Determinants of peritoneal dialysis  
45  
46 499 technique failure in incident US patients. *Perit Dial Int* 2013;33:155-66.
- 47  
48 500 18. Hsieh Y, Wang S, Chang C, et al. The negative impact of early peritonitis on  
49  
50 501 continuous ambulatory peritoneal dialysis patients. *Perit Dial Int* 2014;34:627-35.
- 51  
52 502 19. Barretti P, Doles J, Pinotti D, et al. Efficacy of antibiotic therapy for peritoneal  
53  
54 503 dialysis-associated peritonitis: a proportional meta-analysis. *BMC Infect Dis*  
55  
56 504 2014;14:445.
- 57  
58 505 20. Govindarajulu S, Hawley C, McDonald S, et al. Staphylococcus aureus peritonitis  
59  
60

- 1  
2  
3  
4 506 in Australian peritoneal dialysis patients: predictors, treatment, and outcomes in  
5  
6 507 503 cases. *Perit Dial Int* 2010;30:311-9.  
7  
8 508 21. Matuszkiewicz-Rowinska J. Update on fungal peritonitis and its treatment. *Perit*  
9  
10 509 *Dial Int* 2009;29 Suppl 2:S161-5.  
11  
12 510 22. Szeto C, Chow K. Gram-negative peritonitis--the Achilles heel of peritoneal  
13  
14 511 dialysis? *Perit Dial Int* 2007;27 Suppl 2:S267-71.  
15  
16 512 23. Prasad N, Gupta A, Sharma RK, et al. Impact of nutritional status on peritonitis in  
17  
18 513 CAPD patients. *Perit Dial Int* 2007;27:42-7.  
19  
20 514 24. Wang Q, Bernardini J, Piraino B, et al. Albumin at the start of peritoneal dialysis  
21  
22 515 predicts the development of peritonitis. *Am J Kidney Dis* 2003;41:664-9.  
23  
24 516 25. Li Z, An X, Mao H, et al. Association between depression and  
25  
26 517 malnutrition-inflammation complex syndrome in patients with continuous  
27  
28 518 ambulatory peritoneal dialysis. *Int Urol Nephrol* 2011;43:875-82.  
29  
30 519 26. Fanali G, di Masi A, Trezza V, et al. Human serum albumin: from bench to  
31  
32 520 bedside. *Mol Aspects Med* 2012;33:209-90.  
33  
34 521 27. Yu Z, Tan B, Dainty S, et al. Hypoalbuminaemia, systemic albumin leak and  
35  
36 522 endothelial dysfunction in peritoneal dialysis patients. *Nephrol Dial Transplant*  
37  
38 523 2012;27:4437-45.  
39  
40 524 28. Wang Q, Bernardini J, Piraino B, et al. Albumin at the start of peritoneal dialysis  
41  
42 525 predicts the development of peritonitis. *Am J Kidney Dis* 2003;41:664-9.  
43  
44 526 29. Mehrotra R, Duong U, Jiwakanon S, et al. Serum albumin as a predictor of  
45  
46 527 mortality in peritoneal dialysis: comparisons with hemodialysis. *Am J Kidney Dis*  
47  
48 528 2011;58:418-28.  
49  
50 529 30. Seo M, Choa M, You J, et al. Hypoalbuminemia, low base excess values, and  
51  
52 530 tachypnea predict 28-day mortality in severe sepsis and septic shock patients in  
53  
54 531 the emergency department. *Yonsei Med J* 2016;57:1361-9.  
55  
56 532 31. Mizuno T, Mizokami F, Fukami K, et al. The influence of severe  
57  
58 533 hypoalbuminemia on the half-life of vancomycin in elderly patients with  
59  
60

- 1  
2  
3  
4 534 methicillin-resistant staphylococcus aureus hospital-acquired pneumonia. *Clin*  
5  
6 535 *Interv Aging* 2013;8:1323-8.
- 7  
8 536 32. Juneja M, Baidoo L, Schwartz M, et al. Geriatric inflammatory bowel disease:  
9  
10 537 phenotypic presentation, treatment patterns, nutritional status, outcomes, and  
11  
12 538 comorbidity. *Dig Dis Sci* 2012;57:2408-15.
- 13  
14 539 33. Don B, Kaysen G. Serum albumin: relationship to inflammation and nutrition.  
15  
16 540 *Semin Dial* 2004;17:432-7.
- 17  
18 541 34. Magnussen B, Oren Gradel K, Gorm Jensen T, et al. Association between  
19  
20 542 hypoalbuminaemia and mortality in patients with community-acquired  
21  
22 543 bacteraemia is primarily related to acute disorders. *PLoS ONE* 2016;11:e0160466.
- 23  
24 544 35. Maitra S, Burkart J, Fine A, et al. Patients on chronic peritoneal dialysis for ten  
25  
26 545 years or more in North America. *Perit Dial Int* 2000;20 Suppl 2:S127.
- 27  
28 546 36. Sakaci T, Ahbap E, Koc Y, et al. Clinical outcomes and mortality in elderly  
29  
30 547 peritoneal dialysis patients. *Clinics (Sao Paulo)* 2015;70:363-8.
- 31  
32 548 37. Valderrabano F, Jofre R, Lopez-Gomez JM. Quality of life in end-stage renal  
33  
34 549 disease patients. *Am J Kidney Dis* 2001;38:443-64.
- 35  
36 550 38. Joly D, Anglicheau D, Alberti C, et al. Octogenarians reaching end-stage renal  
37  
38 551 disease: cohort study of decision-making and clinical outcomes. *J Am Soc*  
39  
40 552 *Nephrol* 2003;14:1012-21.
- 41  
42 553 39. Tennankore KK, Bargman JM. Nutrition and the kidney: recommendations for  
43  
44 554 peritoneal dialysis. *Adv Chronic Kidney Dis* 2013;20:190-201.
- 45  
46 555 40. Hsieh YP, Chang CC, Wen YK, et al. Predictors of Peritonitis and the Impact of  
47  
48 556 Peritonitis on Clinical Outcomes of Continuous Ambulatory Peritoneal Dialysis  
49  
50 557 Patients in Taiwan—10 Years' Experience in a Single Center. *Perit Dial Int*  
51  
52 558 2014;34:85.
- 53  
54 559 41. Szeto C, Kwan B, Chow K, et al. Predictors of residual renal function decline in  
55  
56 560 patients undergoing continuous ambulatory peritoneal dialysis. *Perit Dial Int*  
57  
58 561 2015;35:180-8.
- 59  
60

- 1  
2  
3  
4 562 42. Vilar E, Farrington K. Emerging importance of residual renal function in  
5  
6 563 end-stage renal failure. *Semin Dial* 2011;24:487-94.  
7  
8 564 43. Raimann J, Kitzler T, Levin N. Factors affecting loss of residual renal function(s)  
9  
10 565 in dialysis. *Contrib Nephrol* 2012;178:150-6.  
11  
12 566 44. Harris S, Lamping D, Brown E, et al. Clinical outcomes and quality of life in  
13  
14 567 elderly patients on peritoneal dialysis versus hemodialysis. *Perit Dial Int*  
15  
16 568 2002;22:463-70.  
17  
18 569 45. van Diepen AT, van Esch S, Struijk DG, et al. The first peritonitis episode alters  
19  
20 570 the natural course of peritoneal membrane characteristics in peritoneal dialysis  
21  
22 571 patients. *Perit Dial Int* 2015;35:324-32.  
23  
24  
25 572  
26  
27  
28 573  
29  
30 574  
31  
32 575  
33  
34 576  
35  
36 577  
37  
38 578  
39  
40 579  
41  
42  
43 580  
44  
45  
46 581  
47  
48  
49 582  
50  
51  
52 583  
53  
54 584  
55  
56  
57 585  
58  
59  
60

586

587

588

589

590

591

Table 1. Baseline characteristic of the study population

| Variable                             | Peritonitis-free<br>(N=144) | EOP<br>(N=74)     | LOP<br>(N=139)    | P value between<br>EOP and LOP | P value |
|--------------------------------------|-----------------------------|-------------------|-------------------|--------------------------------|---------|
| Age (years)                          | 63.18±13.91                 | 65.87±13.20       | 61.40±13.53       | 0.022                          | 0.075   |
| Gender (male, n, %)                  | 84 (58.3)                   | 37 (50.0)         | 90 (64.7)         | 0.037                          | 0.135   |
| Smoking (%)                          | 40 (27.8)                   | 22 (29.7)         | 31 (22.3)         | 0.233                          | 0.415   |
| Drinking (%)                         | 31 (21.5)                   | 20 (27.0)         | 32 (23.0)         | 0.517                          | 0.659   |
| Charlson comorbidity index score     | 3.76±1.51                   | 5.73±2.17         | 4.42±1.93         | <0.001                         | <0.001  |
| Body mass index (kg/m <sup>2</sup> ) | 23.55±3.76                  | 24.19±3.31        | 24.32±3.38        | 0.791                          | 0.174   |
| Hemoglobin (g/L)                     | 83.67±17.70                 | 89.10±22.90       | 88.53±19.77       | 0.849                          | 0.059   |
| Serum calcium (mmol/L)               | 1.98±0.29                   | 2.14±0.41         | 2.11±0.33         | 0.514                          | 0.001   |
| Serum phosphorus (mmol/L)            | 1.77±0.55                   | 1.91±0.61         | 1.83±0.78         | 0.457                          | 0.349   |
| Serum potassium (mmol/L)             | 4.39±0.65                   | 4.41±0.74         | 4.39±0.80         | 0.865                          | 0.980   |
| Fasting blood glucose (mmol/L)       | 5.38±2.01                   | 6.49±2.93         | 6.09±2.10         | 0.261                          | 0.001   |
| TC (mmol/L)                          | 4.02 (3.36, 5.11)           | 4.59 (3.54, 6.06) | 4.43 (3.57, 5.70) | 0.537                          | 0.022   |
| TG (mmol/L)                          | 1.28 (0.97, 1.74)           | 1.30 (1.00, 2.39) | 1.24 (1.00, 2.17) | 0.469                          | 0.430   |
| HDL-C (mmol/L)                       | 1.11 (0.85, 1.33)           | 1.18 (0.97, 1.43) | 1.19 (0.98, 1.48) | 0.740                          | 0.042   |
| LDL-C (mmol/L)                       | 2.44 (1.94, 3.11)           | 2.65 (2.01, 3.25) | 2.38 (2.00, 3.09) | 0.238                          | 0.473   |
| Serum albumin (g/L)                  | 33.26±6.26                  | 30.01±7.15        | 33.37±4.92        | <0.001                         | <0.001  |
| Serum uric acid (mmol/L)             | 516.93±142.32               | 495.46±183.30     | 536.48±185.05     | 0.124                          | 0.231   |
| Serum creatinine (µmol/L)            | 659.74±185.48               | 749.77±268.11     | 660.42±302.69     | 0.034                          | 0.027   |
| Blood urea nitrogen (mmol/L)         | 24.49±7.72                  | 25.69±10.73       | 24.51±9.85        | 0.421                          | 0.616   |
| eGFR (ml/min/1.73 m <sup>2</sup> )   | 8.49±3.25                   | 6.84±3.82         | 8.48±4.13         | 0.005                          | 0.003   |
| Total Kt/V                           | 2.31 (1.98, 2.56)           | 2.10 (1.71, 2.54) | 2.33 (1.93, 3.04) | 0.008                          | 0.012   |
| Diabetes mellitus(%)                 | 64 (44.4)                   | 54 (73.0)         | 79 (56.8)         | 0.021                          | <0.001  |
| Hypertension (%)                     | 126 (87.5)                  | 66 (89.2)         | 116 (83.5)        | 0.258                          | 0.439   |
| Dyslipidemia (%)                     | 54 (37.5)                   | 41 (55.4)         | 74 (53.2)         | 0.762                          | 0.009   |
| Cardiovascular disease (%)           | 43 (29.9)                   | 30 (40.5)         | 51 (36.7)         | 0.582                          | 0.241   |
| Cerebrovascular disease (%)          | 21 (14.6)                   | 30 (40.5)         | 55 (39.6)         | 0.890                          | <0.001  |
| Calcium                              | 90 (62.5)                   | 44 (59.5)         | 72 (51.8)         | 0.285                          | 0.179   |
| Iron                                 | 73 (50.7)                   | 41 (55.4)         | 68 (48.9)         | 0.367                          | 0.664   |
| Anti-diabetic medications (%)        | 54 (37.5)                   | 38 (51.4)         | 46 (33.1)         | 0.009                          | 0.031   |
| Anti-hypertension medications (%)    | 124 (86.1)                  | 65 (87.8)         | 112 (80.6)        | 0.178                          | 0.284   |
| Lipid-lowering medications (%)       | 38 (26.4)                   | 36 (48.6)         | 61 (43.9)         | 0.506                          | 0.001   |
| Cause of ESKD                        |                             |                   |                   | 0.182                          | 0.008   |
| Glomerulonephritis (%)               | 57 (39.6)                   | 29 (39.2)         | 68 (48.9)         |                                |         |
| Diabetes (%)                         | 42 (29.2)                   | 34 (45.9)         | 46 (33.1)         |                                |         |

|                          |           |           |           |       |       |
|--------------------------|-----------|-----------|-----------|-------|-------|
| Other (%)                | 45 (31.3) | 11 (14.9) | 25 (18.0) |       |       |
| Peritonitis episodes (%) |           |           |           | 0.006 | 0.006 |
| 1                        |           | 17 (23.0) | 57 (41.0) |       |       |
| 2                        |           | 16 (21.6) | 35 (25.2) |       |       |
| ≥3                       |           | 41 (55.4) | 47 (33.8) |       |       |

EOP, early-onset peritonitis; LOP, late-onset peritonitis; TC, total cholesterol; TG total triglyceride; HDL-C, high-density lipoprotein cholesterol; LDL-C, low-density lipoprotein cholesterol; GFR, glomerular filtration rate; ESKD, end stage kidney disease

592

593

594

595

596

Table 2. Organism and outcome of different vintages of peritonitis (n, %)

| Causative organisms          | Early-onset peritonitis |        | Late-onset peritonitis |        | P value |
|------------------------------|-------------------------|--------|------------------------|--------|---------|
|                              | episodes                | (n)    | episodes               | (n)    |         |
| Causative organisms          |                         |        |                        |        |         |
| Gram-positive organisms      | 38                      | (51.4) | 9                      | (6.5)  | <0.001  |
| Staphylococcus aureus        | 7                       | (18.4) | 0                      | (0.0)  | 0.163   |
| Coagulase-negative           | 3                       | (7.9)  | 0                      | (0.0)  | 0.384   |
| Staphylococcus               | 16                      | (42.1) | 8                      | (88.9) | 0.012   |
| Streptococcus species        | 4                       | (10.5) | 1                      | (11.1) | 0.959   |
| Enterococcus species         | 4                       | (10.5) | 0                      | (0.0)  | 0.309   |
| Other Gram-positives         | 4                       | (10.5) | 0                      | (0.0)  | 0.309   |
| Gram-negative organisms      | 20                      | (27.0) | 4                      | (2.9)  | <0.001  |
| Escherichia coli             | 8                       | (40.0) | 0                      | (0.0)  | 0.121   |
| Klebsiella species           | 6                       | (30.0) | 1                      | (25.0) | 0.841   |
| Acinetobacter species        | 4                       | (20.0) | 1                      | (25.0) | 0.822   |
| Pseudomonas Aeruginosa       | 2                       | (10.0) | 1                      | (25.0) | 0.408   |
| Other Gram-negatives         | 0                       | (0.0)  | 1                      | (25.0) | 0.022   |
| Fungi                        | 4                       | (5.4)  | 2                      | (1.4)  | 0.096   |
| Multiple organisms           | 1                       | (1.4)  | 0                      | (0.0)  | 0.170   |
| Culture-negative peritonitis | 11                      | (14.9) | 124                    | (89.2) | <0.001  |
| Outcomes                     |                         |        |                        |        |         |
| Complete cure                | 13                      | (17.6) | 47                     | (33.8) |         |
| Relapse or recurrence        | 25                      | (33.8) | 45                     | (32.4) |         |
| Transfer to hemodialysis     | 20                      | (27.0) | 27                     | (19.4) |         |
| Death                        | 16                      | (21.6) | 20                     | (14.4) |         |

597

598

599

600

601

602

603

1  
2  
3 604  
4 605  
5 606  
6 607  
7 608  
8 609  
9 610  
10 611  
11 612  
12 613  
13 614

Table 3. Cox proportional hazards model for technique failure and patient mortality.

| Variable                                | Univariate Cox regression analysis |             |         | Multivariate Cox regression analysis |             |         |
|-----------------------------------------|------------------------------------|-------------|---------|--------------------------------------|-------------|---------|
|                                         | HR                                 | (95%CI)     | P value | HR                                   | (95%CI)     | P value |
| <b>Technique failure</b>                |                                    |             |         |                                      |             |         |
| Time to first peritonitis (EOP vs. LOP) | 1.801                              | 0.996-3.257 | 0.051   | 1.801                                | 0.996-3.257 | 0.051   |
| Age (year)                              | 1.004                              | 0.982-1.026 | 0.742   |                                      |             |         |
| Sex (men vs. women)                     | 1.045                              | 0.578-1.892 | 0.884   |                                      |             |         |
| Smoking (yes vs. no)                    | 1.112                              | 0.583-2.120 | 0.747   |                                      |             |         |
| Drinking (yes vs. no)                   | 0.750                              | 0.371-1.517 | 0.424   |                                      |             |         |
| Charlson comorbidity index score        | 1.103                              | 0.972-1.252 | 0.130   |                                      |             |         |
| Body mass index (kg/m <sup>2</sup> )    | 1.043                              | 0.953-1.140 | 0.361   |                                      |             |         |
| Hemoglobin (g/L)                        | 1.003                              | 0.990-1.016 | 0.655   |                                      |             |         |
| Total cholesterol (mmol/L)              | 0.979                              | 0.784-1.222 | 0.849   |                                      |             |         |
| Total triglyceride (mmol/L)             | 0.936                              | 0.676-1.297 | 0.691   |                                      |             |         |
| Serum albumin (g/L)                     | 0.990                              | 0.941-1.040 | 0.686   |                                      |             |         |
| Total Kt/V                              | 1.008                              | 0.737-1.379 | 0.959   |                                      |             |         |
| Diabetes (yes vs. no)                   | 1.383                              | 0.742-2.579 | 0.307   |                                      |             |         |
| <b>Patient mortality</b>                |                                    |             |         |                                      |             |         |
| Time to first peritonitis (EOP vs. LOP) | 1.968                              | 1.006-3.851 | 0.048   | 1.010                                | 0.391-2.606 | 0.984   |
| Age (year)                              | 1.037                              | 1.014-1.061 | 0.002   | 1.002                                | 0.973-1.031 | 0.917   |
| Sex (men vs. women)                     | 0.862                              | 0.498-1.492 | 0.596   |                                      |             |         |
| Smoking (yes vs. no)                    | 0.755                              | 0.344-1.659 | 0.484   |                                      |             |         |
| Drinking (yes vs. no)                   | 0.489                              | 0.200-1.191 | 0.115   |                                      |             |         |
| Charlson comorbidity index score        | 0.999                              | 0.878-1.138 | 0.990   |                                      |             |         |
| Body mass index (kg/m <sup>2</sup> )    | 0.977                              | 0.872-1.096 | 0.695   |                                      |             |         |
| Hemoglobin (g/L)                        | 0.996                              | 0.981-1.011 | 0.591   |                                      |             |         |
| Total cholesterol (mmol/L)              | 0.835                              | 0.647-1.078 | 0.167   |                                      |             |         |
| Total triglyceride (mmol/L)             | 0.956                              | 0.664-1.378 | 0.810   |                                      |             |         |
| Serum albumin (g/L)                     | 0.949                              | 0.907-0.993 | 0.025   | 0.965                                | 0.897-1.039 | 0.346   |
| Total Kt/V                              | 0.650                              | 0.409-1.033 | 0.069   | 0.683                                | 0.425-1.099 | 0.116   |
| Diabetes (yes vs. no)                   | 1.176                              | 0.672-2.057 | 0.570   |                                      |             |         |

615



1  
2  
3 616  
4 617  
5 618  
6 619  
7 620  
8 621  
9 622  
10 623  
11 624  
12 625  
13 626

Table 4. Logistic regression analysis of factors associated with early-onset peritonitis

| Variable                         | Univariate logistic regression analysis |             |         | Multivariate logistic regression analysis |             |         |
|----------------------------------|-----------------------------------------|-------------|---------|-------------------------------------------|-------------|---------|
|                                  | OR                                      | (95%CI)     | P value | OR                                        | (95%CI)     | P value |
| Sex (men vs. women)              | 0.544                                   | 0.307-0.966 | 0.038   | 0.586                                     | 0.295-1.163 | 0.126   |
| Age (year)                       | 1.026                                   | 1.004-1.049 | 0.023   | 1.020                                     | 0.994-1.046 | 0.131   |
| Charlson comorbidity index score | 1.355                                   | 1.173-1.566 | <0.001  | 1.285                                     | 1.058-1.561 | 0.011   |
| Diabetes                         | 2.051                                   | 1.111-3.786 | 0.022   | 1.084                                     | 0.457-2.571 | 0.854   |
| Serum albumin (g/L)              | 0.901                                   | 0.853-0.951 | <0.001  | 0.924                                     | 0.867-0.985 | 0.016   |
| Total Kt/V                       | 0.553                                   | 0.370-0.827 | 0.004   | 0.600                                     | 0.394-0.915 | 0.018   |

29 627  
30 628  
31 629  
32 630  
33 631  
34 632  
35 633  
36 634  
37 635  
38 636  
39 637  
40 638  
41 639  
42 640  
43  
44  
45  
46  
47  
48  
49  
50  
51  
52  
53  
54  
55  
56  
57  
58  
59  
60

1  
2  
3  
4 641  
5  
6  
7 642  
8  
9 643  
10  
11  
12 644  
13  
14  
15 645  
16  
17  
18 646  
19  
20 647  
21  
22  
23 648  
24  
25  
26 649  
27  
28  
29 650  
30  
31 651  
32  
33  
34 652  
35  
36  
37 653  
38  
39 654  
40  
41  
42 655  
43  
44  
45 656  
46  
47  
48 657  
49  
50 658  
51  
52  
53 659  
54  
55  
56 660  
57  
58 661 **Figure legends**  
59  
60 662 **Fig.1. Technique survival according to EOP and LOP.**

For peer review only

1  
2  
3  
4 663 Death were censored form the technique survival analysis. Log rank test Chi-square  
5 664 3.943,  $P=0.047$

6  
7  
8 665

9  
10 666

11 667 **Fig.2. Patient survival according to EOP and LOP.**

12  
13  
14 668 Patients who transferred to HD were censored form the patient survival analysis. Log  
15  
16 669 rank test Chi-square 4.060,  $P=0.044$

17  
18 670

19  
20 671  
21  
22  
23  
24  
25  
26  
27  
28  
29  
30  
31  
32  
33  
34  
35  
36  
37  
38  
39  
40  
41  
42  
43  
44  
45  
46  
47  
48  
49  
50  
51  
52  
53  
54  
55  
56  
57  
58  
59  
60

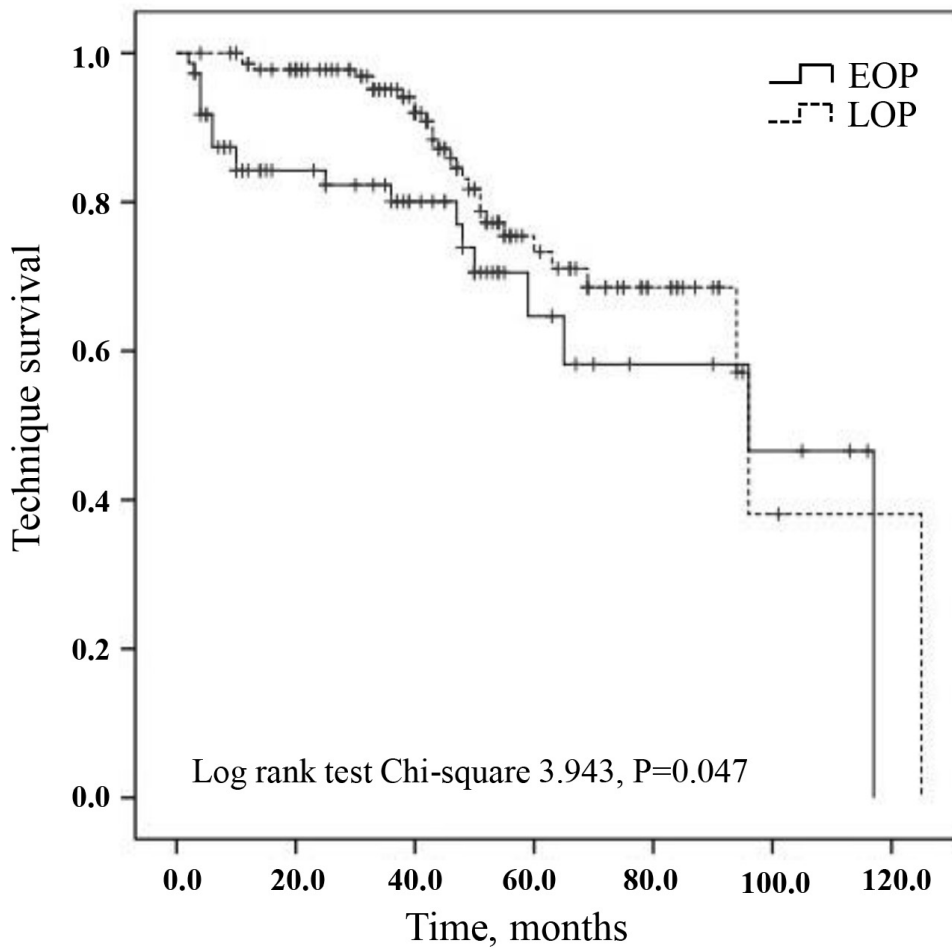

Fig.1. Technique survival according to EOP and LOP. Death were censored form the technique survival analysis. Log rank test Chi-square 3.943, P=0.047

113x111mm (300 x 300 DPI)



Fig.2. Patient survival according to EOP and LOP. Patients who transferred to HD were censored from the patient survival analysis. Log rank test Chi-square 4.060, P=0.044

111x108mm (300 x 300 DPI)

**STROBE 2007 (v4) Statement—Checklist of items that should be included in reports of *cohort studies***

| Section/Topic        | Item # | Recommendation                                                                                                                                                                                                                                                                                                                                                                                                                                                                                                                                                                                                                                                                                                                                                                                                                                                                                                                                                                                                                                                                                                                                                                                                                                                                                                                                                                                                                                                                                                                                                                                                                                                                                                                                                                                                                                                                                                                                                                                                                                                                                                                                                             | Reported on page # |
|----------------------|--------|----------------------------------------------------------------------------------------------------------------------------------------------------------------------------------------------------------------------------------------------------------------------------------------------------------------------------------------------------------------------------------------------------------------------------------------------------------------------------------------------------------------------------------------------------------------------------------------------------------------------------------------------------------------------------------------------------------------------------------------------------------------------------------------------------------------------------------------------------------------------------------------------------------------------------------------------------------------------------------------------------------------------------------------------------------------------------------------------------------------------------------------------------------------------------------------------------------------------------------------------------------------------------------------------------------------------------------------------------------------------------------------------------------------------------------------------------------------------------------------------------------------------------------------------------------------------------------------------------------------------------------------------------------------------------------------------------------------------------------------------------------------------------------------------------------------------------------------------------------------------------------------------------------------------------------------------------------------------------------------------------------------------------------------------------------------------------------------------------------------------------------------------------------------------------|--------------------|
| Title and abstract   | 1      | The analysis of risk factors and outcome in peritoneal dialysis patients with early-onset peritonitis: a multi-center, retrospective, cohort study.                                                                                                                                                                                                                                                                                                                                                                                                                                                                                                                                                                                                                                                                                                                                                                                                                                                                                                                                                                                                                                                                                                                                                                                                                                                                                                                                                                                                                                                                                                                                                                                                                                                                                                                                                                                                                                                                                                                                                                                                                        | 1                  |
|                      |        | <p><b>Objectives</b> To investigate the risk factors associated with early-onset peritonitis (EOP) and its influence on patients' technique survival and mortality.</p> <p><b>Study design</b> Retrospective, cohort study.</p> <p><b>Setting</b> Three peritoneal dialysis units in Shanghai.</p> <p><b>Participants</b> PD patients from June 1, 2006, to May 1, 2018, were recruited and followed up until December 31, 2018. According to time-to-first episode of peritonitis, patients were divided into non-peritonitis (n=144), early-onset peritonitis (<math>\leq</math> 6 months, n=74) and late-onset peritonitis (LOP) (&gt; 6 months, n=139).</p> <p><b>Primary and secondary outcome measures</b> EOP was defined as the first episode of peritonitis occurring within 6 months after the initiation of peritoneal dialysis (PD). The outcomes were all-cause mortality and technique failure.</p> <p><b>Results</b> Of the 357 patients, 74 (20.7%) patients developed their first episode of peritonitis within the first 6 months. Compared with the LOP group, the EOP group had older ages, more female patients, higher Charlson comorbidity index (CCI) score, lower serum albumin levels and renal function at the time of initiation of PD and higher diabetes mellitus and peritonitis rates (<math>P&lt;0.05</math>). Staphylococcus was the most common Gram-positive organism in both EOP and LOP groups. The multivariate logistic regression analysis showed that factors associated with EOP included a higher CCI score (odds ratio (OR) 1.285, <math>P=0.011</math>), lower serum albumin level (OR 0.924, <math>P=0.016</math>) and lower Kt/V (OR 0.600, <math>P=0.018</math>) at start of PD. In the Cox proportional hazards model, EOP was more likely a predictor of technique failure (hazard ratio (HR) 1.801, <math>P=0.051</math>). There was no difference between EOP and LOP for all-cause mortality.</p> <p><b>Conclusion</b> A higher CCI score and lower serum albumin level and Kt/V at PD initiation were significantly associated with EOP. EOP also predicted a high peritonitis rate and poor clinical outcomes.</p> | 2                  |
| <b>Introduction</b>  |        |                                                                                                                                                                                                                                                                                                                                                                                                                                                                                                                                                                                                                                                                                                                                                                                                                                                                                                                                                                                                                                                                                                                                                                                                                                                                                                                                                                                                                                                                                                                                                                                                                                                                                                                                                                                                                                                                                                                                                                                                                                                                                                                                                                            |                    |
| Background/rationale | 2      | The definition of early-onset peritonitis varies widely between studies, which generally refers to peritoneal dialysis related peritonitis occurring within 3-24 months after surgical catheterization. <sup>5-8</sup> Previous studies showed that the first episode of peritonitis in PD patients could significantly affect the prognosis of end-stage renal disease (ESRD) patients. <sup>9</sup> However, few studies have specifically examined the risk factors for peritonitis in the early PD period. And most of these were observational cohort studies carried out in single centers, <sup>5 10 11</sup> limiting the generalizability of their observed outcomes. To                                                                                                                                                                                                                                                                                                                                                                                                                                                                                                                                                                                                                                                                                                                                                                                                                                                                                                                                                                                                                                                                                                                                                                                                                                                                                                                                                                                                                                                                                          | 4                  |

|                              |    |                                                                                                                                                                                                                                                                                                                                                                                                                                                                                                                                                                                                                                                                                                                                         |   |
|------------------------------|----|-----------------------------------------------------------------------------------------------------------------------------------------------------------------------------------------------------------------------------------------------------------------------------------------------------------------------------------------------------------------------------------------------------------------------------------------------------------------------------------------------------------------------------------------------------------------------------------------------------------------------------------------------------------------------------------------------------------------------------------------|---|
|                              |    | determine the risk factors for early-onset peritonitis in Chinese CKD patients and its influence on patients' technique survival and mortality, we conducted this multiple-center, retrospective cohort study.                                                                                                                                                                                                                                                                                                                                                                                                                                                                                                                          |   |
| Objectives                   | 3  | PD patients from June 1, 2006, to May 1, 2018, were recruited and followed up until December 31, 2018. According to time-to-first episode of peritonitis, patients were divided into non-peritonitis (n=144), early-onset peritonitis ( $\leq 6$ months, n=74) and late-onset peritonitis (LOP) ( $> 6$ months, n=139).                                                                                                                                                                                                                                                                                                                                                                                                                 | 4 |
| <b>Methods</b>               |    |                                                                                                                                                                                                                                                                                                                                                                                                                                                                                                                                                                                                                                                                                                                                         |   |
| Study design                 | 4  | Retrospective, cohort study.                                                                                                                                                                                                                                                                                                                                                                                                                                                                                                                                                                                                                                                                                                            | 4 |
| Setting                      | 5  | Three peritoneal dialysis units in Shanghai.                                                                                                                                                                                                                                                                                                                                                                                                                                                                                                                                                                                                                                                                                            | 4 |
| Participants                 | 6  | This was a multi-center retrospective cohort study included 357 patients with ESRD who underwent PD in Department of Nephrology in Baoshan branch of Shanghai First People's Hospital, Shanghai Songjiang District Central Hospital and Shanghai East Hospital, Tongji University School of Medicine. All incident PD patients from June 1, 2006, to May 1, 2018, were recruited and followed up until December 31, 2018. The exclusion criteria were as follows: patients who had been using PD for fewer than 90 days, patients with an age younger than 18 years and patients who initiated PD in other PD centers and previously accepted HD or kidney transplantation.                                                             | 4 |
|                              |    | According to time-to-first episode of peritonitis, patients were divided into non-peritonitis (n=144), early-onset peritonitis ( $\leq 6$ months, n=74) and late-onset peritonitis (LOP) ( $> 6$ months, n=139).                                                                                                                                                                                                                                                                                                                                                                                                                                                                                                                        | 4 |
| Variables                    | 7  | We collected baseline characteristics within 1-3 months from the start of PD, including demographic data (age, gender, smoking, drinking, CCI, BMI), medical history, drug-taking history, biochemical data (hemoglobin, serum electrolyte, fasting blood glucose, total cholesterol, total triglyceride, high-density lipoprotein cholesterol, low-density lipoprotein cholesterol, and serum albumin, uric acid, creatinine, blood urea nitrogen, estimated glomerular filtration rate (eGFR), the clearance rate of urea nitrogen (Kt/V), cause of ESRD, peritonitis episodes. Peritoneal fluid effluent from patients with peritonitis was collected and cultured for 1 to 5 days to identify the bacterial flora in the dialysate. | 6 |
| Data sources/<br>measurement | 8* | Peritoneal fluid effluent from patients with peritonitis was collected and cultured for 1 to 5 days to identify the bacterial flora in the dialysate.                                                                                                                                                                                                                                                                                                                                                                                                                                                                                                                                                                                   | 6 |
| Bias                         | 9  | This was a retrospective cohort study, lacking of some objective information such as education level, economic development and living standard, which may cause bias.                                                                                                                                                                                                                                                                                                                                                                                                                                                                                                                                                                   | 3 |
| Study size                   | 10 | 357 PD patients                                                                                                                                                                                                                                                                                                                                                                                                                                                                                                                                                                                                                                                                                                                         | 4 |
| Quantitative variables       | 11 | The normal distributed data were showed as mean $\pm$ standard deviation (SD) and the skewed data were showed as median values with the 25th to 75th percentile intervals. As for normally distributed data, student's t-test is using for analyzing the differences between the EOP group and LOP group, while one-way ANOVA for differences among in non-peritonitis, EOP group and LOP groups. The Wilcoxon rank sum test for skewed continuous data.                                                                                                                                                                                                                                                                                | 7 |

|                                                                               |                     |     |                                                                                                                                                                                                                                                                                                                                                                                                                                                                                                                                                                                                                                                                                                                                                                                                                                                                                                                                                                                                                                                                                                                                                                                                                                                                                                                                        |      |
|-------------------------------------------------------------------------------|---------------------|-----|----------------------------------------------------------------------------------------------------------------------------------------------------------------------------------------------------------------------------------------------------------------------------------------------------------------------------------------------------------------------------------------------------------------------------------------------------------------------------------------------------------------------------------------------------------------------------------------------------------------------------------------------------------------------------------------------------------------------------------------------------------------------------------------------------------------------------------------------------------------------------------------------------------------------------------------------------------------------------------------------------------------------------------------------------------------------------------------------------------------------------------------------------------------------------------------------------------------------------------------------------------------------------------------------------------------------------------------|------|
| 1<br>2<br>3<br>4<br>5<br>6<br>7<br>8<br>9<br>10<br>11<br>12<br>13<br>14<br>15 | Statistical methods | 12  | All statistical analyses were performed by SPSS 20.0 for Windows (IBM Corp., Armonk, NY, USA). The normal distributed data were showed as mean±standard deviation (SD) and the skewed data were showed as median values with the 25th to 75th percentile intervals. Categorical data were expressed as frequency (n) and percentage (%). As for normally distributed data, student's t-test is using for analyzing the differences between the EOP group and LOP group, while one-way ANOVA for differences among in non-peritonitis, EOP group and LOP groups. The Wilcoxon rank sum test for skewed continuous data and the Chi-square test or Fisher's exact test for categorical data. The Kaplan-Meier survival curves were drawn for each event of interest (technique survival and patient survival) and the log-rank test was used to compare curves. Univariate Cox proportional hazards regression was used to select significant factors associated with study outcomes. Variables whose $P<0.10$ were selected for inclusion in the final multivariate Cox model. Multivariate logistic regression was calculated to select significant risk factors for EOP and the inclusion standard was also $P<0.10$ . Collinearity of variables was tested. A two-tailed $P$ value $<0.05$ was considered statistically significant. | 7    |
| 16                                                                            | <b>Results</b>      |     |                                                                                                                                                                                                                                                                                                                                                                                                                                                                                                                                                                                                                                                                                                                                                                                                                                                                                                                                                                                                                                                                                                                                                                                                                                                                                                                                        |      |
| 17<br>18<br>19<br>20<br>21<br>22<br>23                                        | Participants        | 13* | The first episode of peritonitis was experienced by 74 (20.7%) patients within 6 months after the start of PD. 11 (11/61) in Shanghai East Hospital, 22 (22/142) in Shanghai Songjiang District Central Hospital, 41 (41/154) in Baoshan branch of Shanghai First People's Hospital. There are 19 PD patients suffer the peritonitis within the first 3 months, 6 subjects died, 3 patients transferred to hemodialysis, 0 patients underwent renal transplantation, 10 patients continued peritoneal dialysis. While these 10 PD patients lacked of the information of peritoneal equilibration test.                                                                                                                                                                                                                                                                                                                                                                                                                                                                                                                                                                                                                                                                                                                                 | 8    |
| 24<br>25<br>26<br>27<br>28<br>29<br>30                                        | Descriptive data    | 14* | Median follow-up time for the 357 patients was 33.0 months (interquartile range 14.0-50.0 months). There were 211 males (59.1%) with an average age of $61.6 \pm 14.0$ years, and 145 females (40.9%) with an average age of $65.3 \pm 12.9$ years. The most common primary renal diseases were chronic glomerulonephritis (43.1%) and diabetic nephropathy (34.2%). Compared with the LOP patients, the EOP patient group had older ages, more female patients, higher Charlson comorbidity index (CCI) score and lower serum albumin levels, renal function and Kt/V at the time of initiation of PD and higher diabetes mellitus and peritonitis rates ( $P<0.05$ ).                                                                                                                                                                                                                                                                                                                                                                                                                                                                                                                                                                                                                                                                | 8    |
| 31<br>32<br>33<br>34<br>35                                                    | Outcome data        | 15* | Of the 357 patients, 74 (20.7%) patients developed their first episode of peritonitis within the first 6 months. Compared with the LOP group, the EOP group had older ages, more female patients, higher Charlson comorbidity index (CCI) score, lower serum albumin levels and renal function at the time of initiation of PD and higher diabetes mellitus and peritonitis rates ( $P<0.05$ ). Staphylococcus was the most common Gram-positive organism in both EOP and LOP groups.                                                                                                                                                                                                                                                                                                                                                                                                                                                                                                                                                                                                                                                                                                                                                                                                                                                  | 8-9  |
| 36<br>37<br>38<br>39<br>40<br>41<br>42<br>43<br>44<br>45<br>46                | Main results        | 16  | The multivariate logistic regression analysis showed that factors associated with EOP included a higher CCI score (odds ratio (OR) 1.285, $P=0.011$ ), lower serum albumin level (OR 0.924, $P=0.016$ ) and lower Kt/V (OR 0.600, $P=0.018$ ) at start of PD. In the Cox proportional hazards model, EOP was more likely a predictor of technique failure (hazard ratio (HR) 1.801, $P=0.051$ ). There was no difference between EOP and LOP for all-cause mortality.                                                                                                                                                                                                                                                                                                                                                                                                                                                                                                                                                                                                                                                                                                                                                                                                                                                                  | 9-10 |



|                          |    |                                                                                                                                                                                                                                                                                                                                                                                                                                                                                                                                                                                                                                                                                                                                                                                                                                                                                                   |    |
|--------------------------|----|---------------------------------------------------------------------------------------------------------------------------------------------------------------------------------------------------------------------------------------------------------------------------------------------------------------------------------------------------------------------------------------------------------------------------------------------------------------------------------------------------------------------------------------------------------------------------------------------------------------------------------------------------------------------------------------------------------------------------------------------------------------------------------------------------------------------------------------------------------------------------------------------------|----|
|                          |    |                                                                                                                                                                                                                                                                                                                                                                                                                                                                                                                                                                                                                                                                                                                                                                                                                                                                                                   |    |
| Other analyses           | 17 | EOP was defined as the first episode of peritonitis occurring within 3 months. After univariate and multivariate Cox analysis for technique failure and patient mortality, EOP was significantly associated with mortality compared with the LOP group, with a hazard ratio (HR) of 5.131 (Supplemental table1, $P<0.001$ ). Kaplan-Meier analysis showed that compared with LOP group, patient survival (Log rank 11.211, $P=0.001$ , Supplemental Fig.2) was lower in the EOP group. As for technique survival, there was no significant difference between EOP and LOP group (Log rank 0.179, $P=0.672$ , Supplemental Fig.1). We constructed the univariate and multiple logistic regression model using variables including gender, age, CCI score, diabetes, serum albumin, eGFR. We found that lower eGFR at the start of PD is an independent risk factor for EOP (Supplemental table 2). |    |
| <b>Discussion</b>        |    |                                                                                                                                                                                                                                                                                                                                                                                                                                                                                                                                                                                                                                                                                                                                                                                                                                                                                                   |    |
| Key results              | 18 | A higher CCI score and lower serum albumin level and Kt/V at PD initiation were significantly associated with EOP. EOP also predicted a high peritonitis rate and poor clinical outcomes.                                                                                                                                                                                                                                                                                                                                                                                                                                                                                                                                                                                                                                                                                                         | 10 |
| <b>Limitations</b>       |    |                                                                                                                                                                                                                                                                                                                                                                                                                                                                                                                                                                                                                                                                                                                                                                                                                                                                                                   |    |
| Interpretation           | 20 | This was a retrospective cohort study, lacking of some objective information such as education level, economic development and living standard, which may cause bias. Second, although this was a multicenter study, the sample size was relatively small. Further larger size and prospective investigation are necessary.                                                                                                                                                                                                                                                                                                                                                                                                                                                                                                                                                                       | 14 |
| Generalisability         | 21 | There is a strict exclusion criteria based on PD histories. We conducted a multi-center study which ensured sufficient power in obtaining the risk factors of EOP.                                                                                                                                                                                                                                                                                                                                                                                                                                                                                                                                                                                                                                                                                                                                | 14 |
| <b>Other information</b> |    |                                                                                                                                                                                                                                                                                                                                                                                                                                                                                                                                                                                                                                                                                                                                                                                                                                                                                                   |    |
| Funding                  | 22 | This study was supported by the National Nature Science Foundation of China grants (81670690, 81470991 and 81200492 to N.L., 81270778, 81470920, 81670623 and 81830021 to S.Z.), the Key Discipline Construction Project of Pudong Health Bureau of Shanghai (PWZxk2017-05 to N.L.), the Science Technology grant of Jiangxi Province Municipal Health Commission (20184077 to L.F.), the Branch grant of National key grants of Ministry of Science and Technology (2018YFA0108802 to S.Z.), the US National Institutes of Health (2R01DK08506505A1 to S.Z.), the Shanghai Scientific Committee of China (13PJ1406900 to N.L.).                                                                                                                                                                                                                                                                  | 15 |

\*Give information separately for cases and controls in case-control studies and, if applicable, for exposed and unexposed groups in cohort and cross-sectional studies.

**Note:** An Explanation and Elaboration article discusses each checklist item and gives methodological background and published examples of transparent reporting. The STROBE checklist is best used in conjunction with this article (freely available on the Web sites of PLoS Medicine at <http://www.plosmedicine.org/>, Annals of Internal Medicine at <http://www.annals.org/>, and Epidemiology at <http://www.epidem.com/>). Information on the STROBE Initiative is available at [www.strobe-statement.org](http://www.strobe-statement.org).
